# Supplementary material for: Targeted Characterization of the Chemical Composition of JUUL Systems Aerosol and Comparison with 3R4F Reference Cigarettes and IQOS Heat Sticks
Source: MDPI journal article supplement (doi:10.3390/separations8100168), 2021-10-03
Supplement: s1 [file s1]

Supplementary Materials

# Targeted Characterization of the Chemical Composition of JUUL Systems Aerosol and Comparison with 3R4F Reference Cigarettes and IQOS Heat Sticks

Xin Chen <sup>†</sup>, Patrick C. Bailey, Clarissa Yang, Bryant Hiraki, Michael J. Oldham and I. Gene Gillman <sup>\*</sup>

JUUL Labs Inc., 1000 F St. NW, Washington, DC 20004, USA; xinchen\_2000@yahoo.com (X.C.); patrick.bailey@juul.com (P.C.B.); clarissa.yang@juul.com (C.Y.); bryant.hiraki@juul.com (B.H.); michael.oldham@juul.com (M.J.O.)

<sup>\*</sup> Correspondence: gene.gillman@juul.com

<sup>†</sup> Current Address: Turn Biotechnologies, 319 N. Bernardo Ave., Mountain View, CA 94043, USA.

**Table S1.** Supplementary Methods.

| Compounds Classification              | Compounds                                                                                                                  | Method of Capture | Analysis Method                                                                                                | Instrument       | Testing Lab | Method Reference Code              | ISO17025 Status |
|---------------------------------------|----------------------------------------------------------------------------------------------------------------------------|-------------------|----------------------------------------------------------------------------------------------------------------|------------------|-------------|------------------------------------|-----------------|
| Nicotine, Water, Composition, Menthol | diethylene glycol, ethylene glycol, glycerol, menthol, NFDPM, nicotine, propylene glycol, Water, ACM, DML, Carbon monoxide | Pad/impinger      | Pads were extracted with IPA                                                                                   | GC-TCD/FID, NDIR | Labstat     | TMS- <sup>00</sup> 115a Appendix E | Accredited      |
| Benzoic acid                          | Benzoic acid                                                                                                               | Pad               | Pads were extracted with H <sub>3</sub> PO <sub>4</sub>                                                        | HPLC-UV          | Labstat     | TMS- <sup>00</sup> 115a Appendix F | Accredited      |
| Volatile Compounds                    | Benzene, Toluene, Acrylonitrile, Propylene Oxide                                                                           | Pad               | Sample were puffed through pad into a cryogenic trap containing methanol.                                      | GC-MS (SIM)      | Labstat     | TMS- <sup>00</sup> 124 Appendix G  | Accredited      |
|                                       | 1,3-Butadiene, Isoprene                                                                                                    | Pad/Impinger      | Pads were extracted with IPA                                                                                   | GC-MS            | Enthalpy    | ENT208 Rev. 7.0                    | Accredited      |
| Tobacco Specific Nitrosamines         | N-nitrosornicotine, 4-(N-nitrosomethylamino)-1-(3-pyridyl)-1-butanone                                                      | Pad               | Pads were spiked with internal standard solution containing 4 TSNA analogues and TSN analogues were extraction | LC-MS/MS (ESI)   | Labstat     | TMS- <sup>00</sup> 135 Appendix I  | Accredited      |

|                               |                                                                                                                                       |              |                                                                                                                                                                                    |                |          |                                               |            |
|-------------------------------|---------------------------------------------------------------------------------------------------------------------------------------|--------------|------------------------------------------------------------------------------------------------------------------------------------------------------------------------------------|----------------|----------|-----------------------------------------------|------------|
|                               |                                                                                                                                       |              | into ammonium acetate solution.                                                                                                                                                    |                |          |                                               |            |
| Nicotine Degradation Products | Nicotine-N-Oxide, Cotinine, B-nicotyrine                                                                                              | Pad          | Pads were extracted with ammonium acetate solution                                                                                                                                 | LC-MS/MS       | Labstat  | TMS <sup>00153</sup>                          | Accredited |
|                               | Anatabine, Anabasine, Myosmine, Nornicotine                                                                                           | Pad          | Pads are extracted with methanol/water                                                                                                                                             | LC-MS/MS (ESI) | Enthalpy | AM <sup>-238</sup> v3.1                       | Accredited |
| Carbonyls                     | Formaldehyde, Acetaldehyde, Acrolein, Isobutyraldehyde, Butyraldehyde, Crotonaldehyde, Diacetyl, Acetyl Propionyl, Ethyl Acetoacetate | Pad/Impinger | Sample were puffed through pad into a cryogenic trap containing acetonitrile, extracted with the impinger solution, and derivatized with PFBHA, followed by extraction in toluene. | GC-MS (SIM)    | Labstat  | TMS <sup>00155</sup> and TMS-00155 Appendix G | Accredited |
| Heavy Metal                   | Cadmium, Lead, Chromium, Nickel, Copper, Gold                                                                                         | Pad          | Quartz Pad was extracted with 10% (v/v) ultra-high purity nitric acid.                                                                                                             | ICP-MS         | Labstat  | TMS <sup>00160</sup>                          | Accredited |
| Aromatic Flavourants          | Methyl Acetate, Ethyl Acetate, 1-Butanol, Isobutyl Acetate, Furfural, Isoamyl Acetate, Benzyl Acetate                                 | Pad/Impinger | Pads were extracted with the impinger solution containing acetonitrile                                                                                                             | GC-MS          | Labstat  | TMS <sup>00175</sup>                          | Accredited |
| Aromatic Amines               | 1-aminonaphthalene, 2-aminonaphthalene, 4-aminobiphenyl                                                                               | Pad          | Pad was extracted with dichloromethane                                                                                                                                             | GC-MS (NCI)    | Enthalpy | SOP AM <sup>-221</sup> v4.0                   | Accredited |
| Propionic Acid                | Propionic Acid                                                                                                                        | Pad/Impinger | Sample were puffed through pad into a cryogenic trap containing acetonitrile                                                                                                       | GC-MS (SIM)    | Labstat  | TMS <sup>00177</sup>                          | Accredited |
| Glycidol                      | Glycidol                                                                                                                              | Impinger     | Aerosol was collected in impingers containing                                                                                                                                      | GC-MS          | Enthalpy | ENT203 Rev. 1.0                               | Accredited |

|                |                |              |                                                                                                                                     |                             |          |                       |            |
|----------------|----------------|--------------|-------------------------------------------------------------------------------------------------------------------------------------|-----------------------------|----------|-----------------------|------------|
|                |                |              | trapping solution of internal standard, hydrochloric acid, and p-toluenesulfonyl chloride, followed by hexane addition.             |                             |          |                       |            |
| Water          | Water          | Pad          | Pad was analyzed for water by gas chromatography with thermal conductivity detection (GC-TCD) using a porous polymer packed column. | GC-TCD                      | Labstat  | TMS-00115a Appendix E | Accredited |
| Ammonia        | Ammonia        | Pad/impinger | Vapor was passed through a filter pad and impinger containing 40 mN H2SO4                                                           | Ion exchange chromatography | Enthalpy | ENT307 Rev 2.0        | Accredited |
| Benzo(a)pyrene | Benzo(a)pyrene | Pad          | Pad were extracted for benzo[a]pyrene                                                                                               | GC-MS                       | Enthalpy | ENT217 Rev 1.0        | Accredited |

**Table S2.** Method LOD and LOQ for Me3 analysis.

| Parameter/Constituent | Units | LOD                    | LOQ                    |
|-----------------------|-------|------------------------|------------------------|
| 1,3-Butadiene         | µg    | 0.03                   | 0.32                   |
| 1-Butanol             | µg    | 0.06                   | 0.20                   |
| 2-Aminonaphthalene    | ng    | 6.75×10 <sup>-04</sup> | 2.02×10 <sup>-03</sup> |
| 4-Aminobiphenyl       | ng    | 3.32×10 <sup>-04</sup> | 9.97×10 <sup>-04</sup> |
| β-Nicotyrine          | µg    | 3.81×10 <sup>-03</sup> | 0.01                   |
| Acetaldehyde          | µg    | 0.01                   | 0.03                   |
| Acetyl Propionyl      | µg    | 3.51×10 <sup>-03</sup> | 0.01                   |
| Acrolein              | µg    | 0.01                   | 0.03                   |
| Acrylonitrile         | µg    | 0.01                   | 0.02                   |
| Ammonia               | µg    | 0.01                   | 0.12                   |
| Anabasine             | µg    | 1.29×10 <sup>-03</sup> | 0.01                   |
| Anatabine             | µg    | 6.02×10 <sup>-04</sup> | 5.99×10 <sup>-03</sup> |
| Benzene               | µg    | 3.41×10 <sup>-03</sup> | 0.01                   |
| Benzo(a)pyrene        | ng    | 1.86×10 <sup>-03</sup> | 0.01                   |
| Benzoic Acid          | mg    | 9.59×10 <sup>-05</sup> | 3.20×10 <sup>-04</sup> |
| Benzyl Acetate        | µg    | 0.06                   | 0.20                   |
| Cadmium               | ng    | 0.01                   | 0.04                   |
| Carbon Monoxide       | mg    | NA                     | NA                     |
| Chromium              | ng    | 0.11                   | 0.35                   |
| Copper                | ng    | 0.13                   | 0.44                   |
| Cotinine              | µg    | 1.87×10 <sup>-03</sup> | 0.01                   |
| Crotonaldehyde        | µg    | 0.01                   | 0.02                   |

|                    |          |                        |                        |
|--------------------|----------|------------------------|------------------------|
| Diacetyl           | µg       | 1.74×10 <sup>-03</sup> | 0.01                   |
| Diethylene Glycol  | mg       | 2.40×10 <sup>-04</sup> | 8.00×10 <sup>-04</sup> |
| Ethyl Acetate      | µg       | 0.06                   | 0.20                   |
| Ethyl Acetoacetate | µg       | 4.80×10 <sup>-03</sup> | 0.02                   |
| Ethylene Glycol    | mg       | 5.05×10 <sup>-05</sup> | 1.68×10 <sup>-04</sup> |
| Formaldehyde       | µg       | 0.01                   | 0.02                   |
| Furfural           | µg       | 0.08                   | 0.28                   |
| Glycerol           | mg       | 1.44×10 <sup>-03</sup> | 4.80×10 <sup>-03</sup> |
| Glycidol           | µg       | NA                     | NA                     |
| Gold               | ng       | NA                     | NA                     |
| Isoamyl Acetate    | µg       | 0.10                   | 0.32                   |
| Isobutyl Acetate   | µg       | 0.06                   | 0.20                   |
| Isobutyraldehyde   | µg       | 1.65×10 <sup>-03</sup> | 0.01                   |
| Isoprene           | µg       | 0.32                   | 3.21                   |
| Lead               | ng       | 0.02                   | 0.07                   |
| Menthol            | mg       | 2.44×10 <sup>-04</sup> | 8.14×10 <sup>-04</sup> |
| Methyl Acetate     | µg       | 0.07                   | 0.24                   |
| Myosmine           | µg       | 5.95×10 <sup>-04</sup> | 0.01                   |
| n-Butyraldehyde    | µg       | 3.51×10 <sup>-03</sup> | 0.01                   |
| Nickel             | ng       | 0.21                   | 0.70                   |
| Nicotine           | mg       | 1.35×10 <sup>-04</sup> | 4.49×10 <sup>-04</sup> |
| Nicotine-N-Oxide   | µg       | 0.02                   | 0.06                   |
| NNK                | ng       | 0.02                   | 0.05                   |
| NNN                | ng       | 0.01                   | 0.03                   |
| Nornicotine        | µg       | 9.45×10 <sup>-04</sup> | 5.88×10 <sup>-03</sup> |
| pH                 | Unitless | NA                     | NA                     |
| Propionic Acid     | µg       | 0.04                   | 0.12                   |
| Propylene Glycol   | mg       | 2.40×10 <sup>-04</sup> | 8.01×10 <sup>-04</sup> |
| Propylene Oxide    | ng       | 3.12                   | 10.40                  |
| Toluene            | µg       | 0.01                   | 0.04                   |
| Water              | mg       | 3.83×10 <sup>-03</sup> | 0.01                   |

**Table S3.** Method LOD and LOQ for VT5, VT3 and Me5 analysis.

| Parameter/Constituent | Units | LOD                    | LOQ                    |
|-----------------------|-------|------------------------|------------------------|
| 1-Aminonaphthalene    | ng    | 1.64×10 <sup>-03</sup> | 0.01                   |
| 1,3-Butadiene         | µg    | 5.70×10 <sup>-03</sup> | 1.90×10 <sup>-02</sup> |
| 1-Butanol             | µg    | 0.06                   | 0.20                   |
| 2-Aminonaphthalene    | ng    | 7.12×10 <sup>-04</sup> | 2.37×10 <sup>-03</sup> |
| 4-Aminobiphenyl       | ng    | 2.86×10 <sup>-04</sup> | 9.53×10 <sup>-04</sup> |
| β-Nicotyrine          | µg    | 3.81×10 <sup>-03</sup> | 0.01                   |
| Acetaldehyde          | µg    | 0.01                   | 0.03                   |
| Acetyl Propionyl      | µg    | 3.51×10 <sup>-03</sup> | 0.01                   |
| Acrolein              | µg    | 0.01                   | 0.03                   |
| Acrylonitrile         | µg    | 0.01                   | 0.02                   |
| Ammonia               | µg    | 0.02                   | 0.06                   |
| Anabasine             | µg    | 0.01                   | 0.02                   |
| Anatabine             | µg    | 4.76×10 <sup>-03</sup> | 0.02                   |
| Benzene               | µg    | 3.41×10 <sup>-03</sup> | 0.01                   |
| Benzo(a)pyrene        | ng    | 1.06×10 <sup>-02</sup> | 0.04                   |
| Benzoic Acid          | mg    | 9.59×10 <sup>-05</sup> | 3.20×10 <sup>-04</sup> |
| Benzyl Acetate        | µg    | 0.06                   | 0.20                   |
| Cadmium               | ng    | 0.01                   | 0.04                   |
| Carbon Monoxide       | mg    | 0.01                   | 0.03                   |
| Chromium              | ng    | 0.11                   | 0.35                   |

|                    |          |                        |                        |
|--------------------|----------|------------------------|------------------------|
| Copper             | ng       | 0.13                   | 0.44                   |
| Cotinine           | µg       | 1.87×10 <sup>-03</sup> | 0.01                   |
| Crotonaldehyde     | µg       | 0.01                   | 0.02                   |
| Diacetyl           | µg       | 1.74×10 <sup>-03</sup> | 0.01                   |
| Diethylene Glycol  | mg       | 2.40×10 <sup>-04</sup> | 8.00×10 <sup>-04</sup> |
| Ethyl Acetate      | µg       | 0.06                   | 0.20                   |
| Ethyl Acetoacetate | µg       | 4.80×10 <sup>-03</sup> | 0.02                   |
| Ethylene Glycol    | mg       | 5.05×10 <sup>-05</sup> | 1.68×10 <sup>-04</sup> |
| Formaldehyde       | µg       | 0.01                   | 0.02                   |
| Furfural           | µg       | 0.08                   | 0.28                   |
| Glycerol           | mg       | 1.44×10 <sup>-03</sup> | 4.80×10 <sup>-03</sup> |
| Glycidol           | µg       | NA                     | NA                     |
| Gold               | ng       | 0.01                   | 0.04                   |
| Isoamyl Acetate    | µg       | 0.10                   | 0.32                   |
| Isobutyl Acetate   | µg       | 0.06                   | 0.20                   |
| Isobutyraldehyde   | µg       | 1.65×10 <sup>-03</sup> | 0.01                   |
| Isoprene           | µg       | 8.12×10 <sup>-03</sup> | 0.03                   |
| Lead               | ng       | 0.02                   | 0.07                   |
| Menthol            | mg       | 2.44×10 <sup>-04</sup> | 8.14×10 <sup>-04</sup> |
| Methyl Acetate     | µg       | 0.07                   | 0.24                   |
| Myosmine           | µg       | 0.01                   | 0.03                   |
| n-Butyraldehyde    | µg       | 3.51×10 <sup>-03</sup> | 0.01                   |
| Nickel             | ng       | 0.21                   | 0.70                   |
| Nicotine           | mg       | 1.35×10 <sup>-04</sup> | 4.49×10 <sup>-04</sup> |
| Nicotine-N-Oxide   | µg       | 0.02                   | 0.06                   |
| NNK                | ng       | 0.02                   | 0.05                   |
| NNN                | ng       | 0.01                   | 0.03                   |
| Nornicotine        | µg       | 4.76×10 <sup>-03</sup> | 0.02                   |
| pH                 | Unitless | NA                     | NA                     |
| Propionic Acid     | µg       | 0.04                   | 0.12                   |
| Propylene Glycol   | mg       | 2.40×10 <sup>-04</sup> | 8.01×10 <sup>-04</sup> |
| Propylene Oxide    | ng       | 3.12                   | 10.40                  |
| Toluene            | µg       | 0.01                   | 0.04                   |
| Water              | mg       | 3.83×10 <sup>-03</sup> | 0.01                   |

**Table S4.** Comparison of HPHC and Chemical Intense Aerosol Levels in Virginia Tobacco 5.0% and Smoke Levels in 3R4F Reference Cigarette.

| HPHC Chemical      | JUUL Virginia Tobacco 5.0%<br>(mg/puff) |          | 3R4F (mg/cig)          |          | Source Journal | Chemical and HPHC<br>Normalized by Nicotine<br>(mg/mg) |                        | % Difference<br>vs_3R4F |
|--------------------|-----------------------------------------|----------|------------------------|----------|----------------|--------------------------------------------------------|------------------------|-------------------------|
|                    | HPHC or Chemical                        | Nicotine | HPHC or Chemical       | Nicotine |                | JUUL Virginia Tobacco 5.0%                             | 3R4F                   |                         |
| 1-Aminonaphthalene | ≤8.19×10 <sup>-10</sup>                 | 0.04     | 2.91×10 <sup>-05</sup> | 1.99     | a              | ≤1.96×10 <sup>-08</sup>                                | 1.46×10 <sup>-05</sup> | ↓ ≥99.87                |
| 1-Butanol          | ≤3.00×10 <sup>-05</sup>                 | 0.10     | N/A                    | N/A      | N/A            | ≤3.00×10 <sup>-04</sup>                                | N/A                    | N/A                     |
| 1,3-Butadiene      | ≤2.85×10 <sup>-06</sup>                 | 0.04     | 1.00×10 <sup>-01</sup> | 1.99     | a              | ≤6.83×10 <sup>-05</sup>                                | 5.03×10 <sup>-02</sup> | ↓ ≥99.86                |
| 2-Aminonaphthalene | ≤3.56×10 <sup>-10</sup>                 | 0.04     | 1.81×10 <sup>-05</sup> | 1.99     | a              | ≤8.53×10 <sup>-09</sup>                                | 9.10×10 <sup>-06</sup> | ↓ ≥99.91                |
| 4-Aminobiphenyl    | ≤6.20×10 <sup>-10</sup>                 | 0.04     | 3.91×10 <sup>-06</sup> | 1.99     | a              | ≤1.48×10 <sup>-08</sup>                                | 1.96×10 <sup>-06</sup> | ↓ ≥99.24                |

|                    |                             |      |                             |      |     |                             |                             |                |
|--------------------|-----------------------------|------|-----------------------------|------|-----|-----------------------------|-----------------------------|----------------|
| Acetaldehyde       | $\leq 2.16 \times 10^{-05}$ | 0.10 | $1.84 \times 10^{+00}$      | 1.99 | a   | $\leq 2.16 \times 10^{-04}$ | $9.24 \times 10^{-01}$      | ↓ $\geq 99.98$ |
| Acetyl Propionyl   | $\leq 1.76 \times 10^{-06}$ | 0.10 | $9.19 \times 10^{-02}$      | 1.99 | b   | $\leq 1.76 \times 10^{-05}$ | $4.62 \times 10^{-02}$      | ↓ $\geq 99.96$ |
| Acrolein           | $\leq 2.01 \times 10^{-05}$ | 0.17 | $1.80 \times 10^{-01}$      | 1.99 | a   | $\leq 1.17 \times 10^{-04}$ | $9.05 \times 10^{-02}$      | ↓ $\geq 99.87$ |
| Acrylonitrile      | $\leq 3.20 \times 10^{-06}$ | 0.10 | $2.05 \times 10^{-02}$      | 1.99 | a   | $\leq 3.20 \times 10^{-05}$ | $1.03 \times 10^{-02}$      | ↓ $\geq 99.69$ |
| Ammonia            | NDFB                        | 0.04 | $3.40 \times 10^{-02}$      | 1.99 | a   | NDFB                        | $1.71 \times 10^{-02}$      | NC             |
| Anabasine          | $\leq 1.24 \times 10^{-05}$ | 0.04 | N/A                         | N/A  | N/A | $\leq 2.98 \times 10^{-04}$ | N/A                         | N/A            |
| Anatabine          | $\leq 2.38 \times 10^{-06}$ | 0.04 | N/A                         | N/A  | N/A | $\leq 5.70 \times 10^{-05}$ | N/A                         | N/A            |
| Benzene            | $\leq 1.71 \times 10^{-06}$ | 0.10 | $8.88 \times 10^{-02}$      | 1.99 | a   | $\leq 1.71 \times 10^{-05}$ | $4.46 \times 10^{-02}$      | ↓ $\geq 99.96$ |
| Benzo(a)pyrene     | $\leq 5.31 \times 10^{-09}$ | 0.04 | $1.51 \times 10^{-05}$      | 1.99 | a   | $\leq 1.27 \times 10^{-07}$ | $7.59 \times 10^{-06}$      | ↓ $\geq 98.32$ |
| Benzoic Acid       | $1.37 \times 10^{-01}$      | 0.17 | N/A                         | N/A  | N/A | $7.94 \times 10^{-01}$      | N/A                         | N/A            |
| Benzyl Acetate     | $\leq 3.00 \times 10^{-05}$ | 0.10 | N/A                         | N/A  | N/A | $\leq 3.00 \times 10^{-04}$ | N/A                         | N/A            |
| β-Nicotyrine       | $\leq 8.25 \times 10^{-06}$ | 0.17 | N/A                         | N/A  | N/A | $\leq 4.79 \times 10^{-05}$ | N/A                         | N/A            |
| Cadmium            | $\leq 5.25 \times 10^{-09}$ | 0.10 | $9.32 \times 10^{-05}$      | 1.99 | a   | $\leq 5.26 \times 10^{-08}$ | $4.68 \times 10^{-05}$      | ↓ $\geq 99.89$ |
| Carbon Monoxide    | $\leq 5.25 \times 10^{-03}$ | 0.04 | $3.05 \times 10^{+01}$      | 1.99 | a   | $\leq 1.26 \times 10^{-01}$ | $1.53 \times 10^{+01}$      | ↓ $\geq 99.18$ |
| Chromium           | NDFB                        | 0.10 | $\leq 1.19 \times 10^{-05}$ | 1.74 | c   | NDFB                        | $\leq 6.84 \times 10^{-06}$ | NC             |
| Copper             | $\leq 6.56 \times 10^{-08}$ | 0.10 | N/A                         | N/A  | N/A | $\leq 6.57 \times 10^{-07}$ | N/A                         | N/A            |
| Cotinine           | $6.57 \times 10^{-06}$      | 0.17 | N/A                         | N/A  | N/A | $3.81 \times 10^{-05}$      | N/A                         | N/A            |
| Crotonaldehyde     | $\leq 3.11 \times 10^{-06}$ | 0.10 | $5.95 \times 10^{-02}$      | 1.99 | a   | $\leq 3.12 \times 10^{-05}$ | $2.99 \times 10^{-02}$      | ↓ $\geq 99.90$ |
| Diacetyl           | $\leq 8.70 \times 10^{-07}$ | 0.10 | $3.37 \times 10^{-01}$      | 1.99 | a   | $\leq 8.71 \times 10^{-06}$ | $1.69 \times 10^{-01}$      | ↓ $\geq 99.99$ |
| Diethylene Glycol  | $\leq 1.20 \times 10^{-04}$ | 0.10 | N/A                         | N/A  | N/A | $\leq 1.20 \times 10^{-03}$ | N/A                         | N/A            |
| Ethyl Acetate      | $\leq 1.30 \times 10^{-04}$ | 0.04 | N/A                         | N/A  | N/A | $\leq 3.45 \times 10^{-03}$ | N/A                         | N/A            |
| Ethyl Acetoacetate | $\leq 2.40 \times 10^{-06}$ | 0.10 | N/A                         | N/A  | N/A | $\leq 2.40 \times 10^{-05}$ | N/A                         | N/A            |
| Ethylene Glycol    | $\leq 1.09 \times 10^{-04}$ | 0.10 | N/A                         | N/A  | N/A | $\leq 1.09 \times 10^{-03}$ | N/A                         | N/A            |
| Formaldehyde       | $6.03 \times 10^{-05}$      | 0.17 | $8.71 \times 10^{-02}$      | 1.99 | a   | $3.50 \times 10^{-04}$      | $4.38 \times 10^{-02}$      | ↓ 99.2         |
| Furfural           | $\leq 4.20 \times 10^{-05}$ | 0.10 | $2.59 \times 10^{-02}$      | 1.74 | c   | $\leq 4.20 \times 10^{-04}$ | $1.49 \times 10^{-02}$      | ↓ $\geq 97.18$ |
| Glycerol           | $2.12 \times 10^{+00}$      | 0.17 | $2.70 \times 10^{+00}$      | 1.99 | a   | $1.23 \times 10^{+01}$      | $1.36 \times 10^{+00}$      | 808.58         |
| Glycidol           | NR                          | 0.10 | $1.76 \times 10^{-03}$      | 1.99 | a   | NR                          | $8.84 \times 10^{-04}$      | N/A            |
| Gold               | $\leq 6.33 \times 10^{-09}$ | 0.04 | N/A                         | N/A  | N/A | $\leq 1.52 \times 10^{-07}$ | N/A                         | N/A            |
| Isoamyl Acetate    | $\leq 4.80 \times 10^{-05}$ | 0.10 | N/A                         | N/A  | N/A | $\leq 4.80 \times 10^{-04}$ | N/A                         | N/A            |
| Isobutyl Acetate   | $\leq 3.00 \times 10^{-05}$ | 0.10 | N/A                         | N/A  | N/A | $\leq 3.00 \times 10^{-04}$ | N/A                         | N/A            |
| Isobutyraldehyde   | $\leq 8.26 \times 10^{-07}$ | 0.10 | N/A                         | N/A  | N/A | $\leq 8.27 \times 10^{-06}$ | N/A                         | N/A            |
| Isoprene           | $\leq 4.06 \times 10^{-06}$ | 0.04 | $7.99 \times 10^{-01}$      | 1.99 | a   | $\leq 9.72 \times 10^{-05}$ | $4.02 \times 10^{-01}$      | ↓ $\geq 99.98$ |
| Lead               | $\leq 4.55 \times 10^{-08}$ | 0.10 | $3.12 \times 10^{-05}$      | 1.74 | c   | $\leq 4.55 \times 10^{-07}$ | $1.79 \times 10^{-05}$      | ↓ $\geq 97.46$ |
| Menthol            | $\leq 1.22 \times 10^{-04}$ | 0.10 | $\leq 1.00 \times 10^{-05}$ | 2.10 | d   | $\leq 1.22 \times 10^{-03}$ | $\leq 4.76 \times 10^{-06}$ | NC             |
| Methyl Acetate     | $\leq 3.60 \times 10^{-05}$ | 0.10 | N/A                         | N/A  | N/A | $\leq 3.60 \times 10^{-04}$ | N/A                         | N/A            |
| Myosmine           | $\leq 1.93 \times 10^{-05}$ | 0.04 | N/A                         | N/A  | N/A | $\leq 4.62 \times 10^{-04}$ | N/A                         | N/A            |
| n-Butyraldehyde    | $\leq 1.76 \times 10^{-06}$ | 0.10 | $9.30 \times 10^{-02}$      | 1.99 | a   | $\leq 1.76 \times 10^{-05}$ | $4.67 \times 10^{-02}$      | ↓ $\geq 99.96$ |
| Nickel             | $\leq 1.05 \times 10^{-07}$ | 0.10 | $\leq 1.29 \times 10^{-05}$ | 1.74 | c   | $\leq 1.05 \times 10^{-06}$ | $\leq 7.41 \times 10^{-06}$ | NC             |
| Nicotine           | $1.72 \times 10^{-01}$      | 0.17 | $1.99 \times 10^{+00}$      | 1.99 | a   | $1.00 \times 10^{+00}$      | $1.00 \times 10^{+00}$      | N/A            |

|                  |                             |      |                        |      |     |                             |                        |                          |
|------------------|-----------------------------|------|------------------------|------|-----|-----------------------------|------------------------|--------------------------|
| Nicotine-N-Oxide | $\leq 8.72 \times 10^{-06}$ | 0.10 | N/A                    | N/A  | N/A | $\leq 8.73 \times 10^{-05}$ | N/A                    | N/A                      |
| NNK              | $\leq 7.53 \times 10^{-09}$ | 0.10 | $2.95 \times 10^{-04}$ | 1.99 | a   | $\leq 7.54 \times 10^{-08}$ | $1.48 \times 10^{-04}$ | $\downarrow \geq 99.95$  |
| NNN              | $\leq 4.92 \times 10^{-09}$ | 0.10 | $3.37 \times 10^{-04}$ | 1.99 | a   | $\leq 4.93 \times 10^{-08}$ | $1.69 \times 10^{-04}$ | $\downarrow \geq 99.97$  |
| Normicotine      | $2.42 \times 10^{-05}$      | 0.04 | N/A                    | N/A  | N/A | $5.78 \times 10^{-04}$      | N/A                    | N/A                      |
| Propionic Acid   | $\leq 1.80 \times 10^{-05}$ | 0.10 | N/A                    | N/A  | N/A | $\leq 1.80 \times 10^{-04}$ | N/A                    | N/A                      |
| Propylene Glycol | $8.30 \times 10^{-01}$      | 0.17 | $2.37 \times 10^{-02}$ | 1.74 | c   | $4.82 \times 10^{+00}$      | $1.36 \times 10^{-02}$ | 35265.37                 |
| Propylene Oxide  | $\leq 1.56 \times 10^{-06}$ | 0.10 | $1.00 \times 10^{+00}$ | 1.99 | a   | $\leq 1.56 \times 10^{-05}$ | $5.03 \times 10^{-01}$ | $\downarrow \geq 100.00$ |
| Toluene          | $\leq 6.12 \times 10^{-06}$ | 0.10 | $1.53 \times 10^{-01}$ | 1.99 | a   | $\leq 6.12 \times 10^{-05}$ | $7.69 \times 10^{-02}$ | $\downarrow \geq 99.92$  |
| Water            | $4.31 \times 10^{-01}$      | 0.17 | $1.58 \times 10^{+01}$ | 1.89 | e   | $2.50 \times 10^{+00}$      | $8.36 \times 10^{+00}$ | $\downarrow 70.11$       |

Average % Difference, Excluding Glycerol, PG and Water. a: Jaccard et al. 2019 b: Moldoveanu et al. 2017 c: Helen et al. 2018 d: Uchiyama et al. 2018 e: Schaller et al. 2016 f: Pappas et al. 2014 g: Roemer et al. 2012 h: IQOS PMTA, 2019.

**Table S5.** Comparison of HPHC and Chemical Non-Intense Aerosol Levels in Virginia Tobacco 5.0% and Smoke Levels in 3R4F Reference Cigarette.

| HPHC Chemical       | JUUL Virginia Tobacco 5.0% (mg/puff) |          | 3R4F (mg/cig)               |          | Source Journal | Chemical and HPHC Normalized by Nicotine (mg/mg) |                             | % Difference vs_3R4F    |
|---------------------|--------------------------------------|----------|-----------------------------|----------|----------------|--------------------------------------------------|-----------------------------|-------------------------|
|                     | HPHC or Chemical                     | Nicotine | HPHC or Chemical            | Nicotine |                | JUUL Virginia Tobacco 5.0%                       | 3R4F                        |                         |
| 1-Aminonaphthalene  | $\leq 8.19 \times 10^{-10}$          | 0.04     | $1.42 \times 10^{-05}$      | 0.70     | a              | $\leq 1.96 \times 10^{-08}$                      | $2.02 \times 10^{-05}$      | $\downarrow \geq 99.90$ |
| 1-Butanol           | $\leq 3.00 \times 10^{-05}$          | 0.05     | N/A                         | N/A      | N/A            | $\leq 5.52 \times 10^{-04}$                      | N/A                         | N/A                     |
| 1,3-Butadiene       | $\leq 2.85 \times 10^{-06}$          | 0.04     | $3.79 \times 10^{-02}$      | 0.70     | a              | $\leq 6.83 \times 10^{-05}$                      | $5.40 \times 10^{-02}$      | $\downarrow \geq 99.87$ |
| 2-Aminonaphthalene  | $\leq 3.56 \times 10^{-10}$          | 0.04     | $8.77 \times 10^{-06}$      | 0.70     | a              | $\leq 8.53 \times 10^{-09}$                      | $1.25 \times 10^{-05}$      | $\downarrow \geq 99.93$ |
| 4-Aminobiphenyl     | $\leq 6.20 \times 10^{-10}$          | 0.04     | $1.54 \times 10^{-06}$      | 0.70     | a              | $\leq 1.48 \times 10^{-08}$                      | $2.19 \times 10^{-06}$      | $\downarrow \geq 99.32$ |
| Acetaldehyde        | $\leq 2.16 \times 10^{-05}$          | 0.05     | $5.97 \times 10^{-01}$      | 0.70     | a              | $\leq 3.97 \times 10^{-04}$                      | $8.50 \times 10^{-01}$      | $\downarrow \geq 99.95$ |
| Acetyl Propionyl    | $\leq 1.76 \times 10^{-06}$          | 0.05     | $2.95 \times 10^{-02}$      | 0.70     | b              | $\leq 3.23 \times 10^{-05}$                      | $4.21 \times 10^{-02}$      | $\downarrow \geq 99.92$ |
| Acrolein            | $\leq 2.01 \times 10^{-05}$          | 0.10     | $5.32 \times 10^{-02}$      | 0.70     | a              | $\leq 1.92 \times 10^{-04}$                      | $7.58 \times 10^{-02}$      | $\downarrow \geq 99.75$ |
| Acrylonitrile       | $\leq 3.20 \times 10^{-06}$          | 0.05     | $5.23 \times 10^{-03}$      | 0.70     | a              | $\leq 5.89 \times 10^{-05}$                      | $7.45 \times 10^{-03}$      | $\downarrow \geq 99.21$ |
| Ammonia             | NDFB                                 | 0.04     | $9.64 \times 10^{-03}$      | 0.70     | a              | NDFB                                             | $1.37 \times 10^{-02}$      | NC                      |
| Anabasine           | $\leq 1.24 \times 10^{-05}$          | 0.04     | N/A                         | N/A      | N/A            | $\leq 2.98 \times 10^{-04}$                      | N/A                         | N/A                     |
| Anatabine           | $\leq 2.38 \times 10^{-06}$          | 0.04     | N/A                         | N/A      | N/A            | $\leq 5.70 \times 10^{-05}$                      | N/A                         | N/A                     |
| Benzene             | $\leq 1.71 \times 10^{-06}$          | 0.05     | $3.36 \times 10^{-02}$      | 0.70     | a              | $\leq 3.14 \times 10^{-05}$                      | $4.79 \times 10^{-02}$      | $\downarrow \geq 99.93$ |
| Benzo(a)pyrene      | $\leq 5.31 \times 10^{-09}$          | 0.04     | $6.30 \times 10^{-06}$      | 0.70     | a              | $\leq 1.27 \times 10^{-07}$                      | $8.97 \times 10^{-06}$      | $\downarrow \geq 98.58$ |
| Benzoic Acid        | $7.81 \times 10^{-02}$               | 0.10     | N/A                         | N/A      | N/A            | $7.45 \times 10^{-01}$                           | N/A                         | N/A                     |
| Benzyl Acetate      | $\leq 3.00 \times 10^{-05}$          | 0.05     | N/A                         | N/A      | N/A            | $\leq 5.52 \times 10^{-04}$                      | N/A                         | N/A                     |
| $\beta$ -Nicotyrine | $\leq 8.25 \times 10^{-06}$          | 0.08     | N/A                         | N/A      | N/A            | $\leq 9.72 \times 10^{-05}$                      | N/A                         | N/A                     |
| Cadmium             | $\leq 5.25 \times 10^{-09}$          | 0.05     | $2.45 \times 10^{-05}$      | 0.70     | a              | $\leq 9.66 \times 10^{-08}$                      | $3.49 \times 10^{-05}$      | $\downarrow \geq 99.72$ |
| Carbon Monoxide     | $\leq 5.25 \times 10^{-03}$          | 0.04     | $1.00 \times 10^{+01}$      | 0.70     | a              | $\leq 1.26 \times 10^{-01}$                      | $1.42 \times 10^{+01}$      | $\downarrow \geq 99.12$ |
| Chromium            | NDFB                                 | 0.05     | $\leq 8.80 \times 10^{-07}$ | 0.70     | f              | NDFB                                             | $\leq 1.25 \times 10^{-06}$ | NC                      |

|                    |                             |      |                             |      |     |                             |                             |                |
|--------------------|-----------------------------|------|-----------------------------|------|-----|-----------------------------|-----------------------------|----------------|
| Copper             | $\leq 2.84 \times 10^{-07}$ | 0.10 | N/A                         | N/A  | N/A | $\leq 2.71 \times 10^{-06}$ | N/A                         | N/A            |
| Cotinine           | $\leq 4.06 \times 10^{-06}$ | 0.05 | N/A                         | N/A  | N/A | $\leq 7.48 \times 10^{-05}$ | N/A                         | N/A            |
| Crotonaldehyde     | $\leq 3.11 \times 10^{-06}$ | 0.05 | $9.89 \times 10^{-03}$      | 0.70 | a   | $\leq 5.73 \times 10^{-05}$ | $1.41 \times 10^{-02}$      | ↓ $\geq 99.59$ |
| Diacetyl           | $\leq 8.70 \times 10^{-07}$ | 0.05 | $1.15 \times 10^{-01}$      | 0.70 | b   | $\leq 1.60 \times 10^{-05}$ | $1.64 \times 10^{-01}$      | ↓ $\geq 99.99$ |
| Diethylene Glycol  | $\leq 1.20 \times 10^{-04}$ | 0.05 | N/A                         | N/A  | N/A | $\leq 2.21 \times 10^{-03}$ | N/A                         | N/A            |
| Ethyl Acetate      | $\leq 3.00 \times 10^{-05}$ | 0.05 | N/A                         | N/A  | N/A | $\leq 5.52 \times 10^{-04}$ | N/A                         | N/A            |
| Ethyl Acetoacetate | $\leq 2.40 \times 10^{-06}$ | 0.05 | N/A                         | N/A  | N/A | $\leq 4.42 \times 10^{-05}$ | N/A                         | N/A            |
| Ethylene Glycol    | $\leq 1.09 \times 10^{-04}$ | 0.05 | N/A                         | N/A  | N/A | $\leq 2.01 \times 10^{-03}$ | N/A                         | N/A            |
| Formaldehyde       | $8.33 \times 10^{-05}$      | 0.08 | $2.47 \times 10^{-02}$      | 0.70 | a   | $9.82 \times 10^{-04}$      | $3.52 \times 10^{-02}$      | ↓ 97.21        |
| Furfural           | $\leq 4.20 \times 10^{-05}$ | 0.05 | $1.40 \times 10^{-02}$      | 0.76 | d   | $\leq 7.73 \times 10^{-04}$ | $1.84 \times 10^{-02}$      | ↓ $\geq 95.80$ |
| Glycerol           | $1.24 \times 10^{+00}$      | 0.10 | $2.70 \times 10^{+00}$      | 0.70 | a   | $1.19 \times 10^{+01}$      | $3.85 \times 10^{+00}$      | 208.86         |
| Glycidol           | NR                          | 0.05 | N/A                         | N/A  | N/A | NR                          | N/A                         | N/A            |
| Gold               | $\leq 6.33 \times 10^{-09}$ | 0.04 | N/A                         | N/A  | N/A | $\leq 1.52 \times 10^{-07}$ | N/A                         | N/A            |
| Isoamyl Acetate    | $\leq 4.80 \times 10^{-05}$ | 0.05 | N/A                         | N/A  | N/A | $\leq 8.83 \times 10^{-04}$ | N/A                         | N/A            |
| Isobutyl Acetate   | $\leq 3.00 \times 10^{-05}$ | 0.05 | N/A                         | N/A  | N/A | $\leq 5.52 \times 10^{-04}$ | N/A                         | N/A            |
| Isobutyraldehyde   | $\leq 8.26 \times 10^{-07}$ | 0.05 | N/A                         | N/A  | N/A | $\leq 1.52 \times 10^{-05}$ | N/A                         | N/A            |
| Isoprene           | $\leq 4.06 \times 10^{-06}$ | 0.04 | $2.88 \times 10^{-01}$      | 0.70 | a   | $\leq 9.72 \times 10^{-05}$ | $4.10 \times 10^{-01}$      | ↓ $\geq 99.98$ |
| Lead               | $\leq 4.55 \times 10^{-08}$ | 0.10 | $9.20 \times 10^{-06}$      | 0.70 | f   | $\leq 4.34 \times 10^{-07}$ | $1.31 \times 10^{-05}$      | ↓ $\geq 96.69$ |
| Menthol            | $\leq 1.22 \times 10^{-04}$ | 0.05 | $\leq 1.00 \times 10^{-05}$ | 0.76 | a   | $\leq 2.25 \times 10^{-03}$ | $\leq 1.32 \times 10^{-05}$ | NC             |
| Methyl Acetate     | $\leq 3.60 \times 10^{-05}$ | 0.05 | N/A                         | N/A  | N/A | $\leq 6.62 \times 10^{-04}$ | N/A                         | N/A            |
| Myosmine           | $\leq 1.93 \times 10^{-05}$ | 0.04 | N/A                         | N/A  | N/A | $\leq 4.62 \times 10^{-04}$ | N/A                         | N/A            |
| n-Butyraldehyde    | $\leq 1.76 \times 10^{-06}$ | 0.05 | $2.84 \times 10^{-02}$      | 0.70 | a   | $\leq 3.23 \times 10^{-05}$ | $4.05 \times 10^{-02}$      | ↓ $\geq 99.92$ |
| Nickel             | $\leq 4.55 \times 10^{-07}$ | 0.05 | $\leq 3.80 \times 10^{-07}$ | 0.70 | f   | $\leq 8.37 \times 10^{-06}$ | $\leq 5.41 \times 10^{-07}$ | NC             |
| Nicotine           | $1.05 \times 10^{-01}$      | 0.10 | $7.02 \times 10^{-01}$      | 0.70 | a   | $1.00 \times 10^{+00}$      | $1.00 \times 10^{+00}$      | N/A            |
| Nicotine-N-Oxide   | $\leq 8.72 \times 10^{-06}$ | 0.05 | N/A                         | N/A  | N/A | $\leq 1.60 \times 10^{-04}$ | N/A                         | N/A            |
| NNK                | $\leq 7.53 \times 10^{-09}$ | 0.05 | $1.13 \times 10^{-04}$      | 0.70 | a   | $\leq 1.39 \times 10^{-07}$ | $1.61 \times 10^{-04}$      | ↓ $\geq 99.91$ |
| NNN                | $\leq 4.92 \times 10^{-09}$ | 0.05 | $1.31 \times 10^{-04}$      | 0.70 | a   | $\leq 9.06 \times 10^{-08}$ | $1.87 \times 10^{-04}$      | ↓ $\geq 99.95$ |
| Normicotine        | $2.42 \times 10^{-05}$      | 0.04 | N/A                         | N/A  | N/A | $5.78 \times 10^{-04}$      | N/A                         | N/A            |
| Propionic Acid     | $\leq 1.80 \times 10^{-05}$ | 0.05 | N/A                         | N/A  | N/A | $\leq 3.31 \times 10^{-04}$ | N/A                         | N/A            |
| Propylene Glycol   | $5.32 \times 10^{-01}$      | 0.10 | $3.20 \times 10^{-03}$      | 0.76 | d   | $5.07 \times 10^{+00}$      | $4.21 \times 10^{-03}$      | 120417.77      |
| Propylene Oxide    | $\leq 1.56 \times 10^{-06}$ | 0.05 | $2.97 \times 10^{-01}$      | 0.70 | a   | $\leq 2.87 \times 10^{-05}$ | $4.23 \times 10^{-01}$      | ↓ $\geq 99.99$ |
| Toluene            | $\leq 6.12 \times 10^{-06}$ | 0.05 | $5.14 \times 10^{-02}$      | 0.70 | a   | $\leq 1.13 \times 10^{-04}$ | $7.32 \times 10^{-02}$      | ↓ $\geq 99.85$ |
| Water              | $2.82 \times 10^{-01}$      | 0.10 | $3.20 \times 10^{+00}$      | 0.76 | d   | $2.69 \times 10^{+00}$      | $4.21 \times 10^{+00}$      | ↓ 36.14        |

Average % Difference, Excluding Glycerol, PG and Water. a: Jaccard et al. 2019 b: Moldoveanu et al. 2017 c: Helen et al. 2018 d: Uchiyama et al. 2018 e: Schaller et al. 2016 f: Pappas et al. 2014 g: Roemer et al. 2012 h: IQOS PMTA, 2019.

**Table S6.** Comparison of HPHC and Chemical Non-Intense Aerosol Levels in Virginia Tobacco 5.0% and Smoke Levels in IQOS regular.

| HPHC Chemical      | JUUL Virginia Tobacco 5.0% (mg/puff) |          | IQOS (mg/cig)               |          |                | Chemical and HPHC Normalized by Nicotine (mg/mg) |                             | % Difference vs_IQOS |
|--------------------|--------------------------------------|----------|-----------------------------|----------|----------------|--------------------------------------------------|-----------------------------|----------------------|
|                    | HPHC or Chemical                     | Nicotine | HPHC or Chemical            | Nicotine | Source Journal | JUUL Virginia Tobacco 5.0%                       | IQOS                        |                      |
| 1-Aminonaphthalene | $\leq 8.19 \times 10^{-10}$          | 0.04     | $7.70 \times 10^{-08}$      | 1.32     | e              | $\leq 1.96 \times 10^{-08}$                      | $5.83 \times 10^{-08}$      | ↓ ≥66.39             |
| 1-Butanol          | $\leq 3.00 \times 10^{-05}$          | 0.10     | N/A                         | N/A      | N/A            | $\leq 3.00 \times 10^{-04}$                      | N/A                         | N/A                  |
| 1,3-Butadiene      | $\leq 2.85 \times 10^{-06}$          | 0.04     | $2.94 \times 10^{-04}$      | 1.32     | e              | $\leq 6.83 \times 10^{-05}$                      | $2.23 \times 10^{-04}$      | ↓ ≥69.34             |
| 2-Aminonaphthalene | $\leq 3.56 \times 10^{-10}$          | 0.04     | $4.60 \times 10^{-08}$      | 1.32     | e              | $\leq 8.53 \times 10^{-09}$                      | $3.48 \times 10^{-08}$      | ↓ ≥75.53             |
| 4-Aminobiphenyl    | $\leq 6.20 \times 10^{-10}$          | 0.04     | $9.00 \times 10^{-09}$      | 1.29     | c              | $\leq 1.48 \times 10^{-08}$                      | $6.98 \times 10^{-09}$      | NC                   |
| Acetaldehyde       | $\leq 2.16 \times 10^{-05}$          | 0.10     | $2.19 \times 10^{-01}$      | 1.32     | e              | $\leq 2.16 \times 10^{-04}$                      | $1.66 \times 10^{-01}$      | ↓ ≥99.87             |
| Acetyl Propionyl   | $\leq 1.76 \times 10^{-06}$          | 0.10     | N/A                         | N/A      | N/A            | $\leq 1.76 \times 10^{-05}$                      | N/A                         | N/A                  |
| Acrolein           | $\leq 2.01 \times 10^{-05}$          | 0.17     | $1.13 \times 10^{-02}$      | 1.32     | e              | $\leq 1.17 \times 10^{-04}$                      | $8.56 \times 10^{-03}$      | ↓ ≥98.64             |
| Acrylonitrile      | $\leq 3.20 \times 10^{-06}$          | 0.10     | $2.58 \times 10^{-04}$      | 1.32     | e              | $\leq 3.20 \times 10^{-05}$                      | $1.95 \times 10^{-04}$      | ↓ ≥83.61             |
| Ammonia            | NDFB                                 | 0.04     | $1.42 \times 10^{-02}$      | 1.32     | e              | NDFB                                             | $1.08 \times 10^{-02}$      | NC                   |
| Anabasine          | $\leq 1.24 \times 10^{-05}$          | 0.04     | N/A                         | N/A      | N/A            | $\leq 2.98 \times 10^{-04}$                      | N/A                         | N/A                  |
| Anatabine          | $\leq 2.38 \times 10^{-06}$          | 0.04     | N/A                         | N/A      | N/A            | $\leq 5.70 \times 10^{-05}$                      | N/A                         | N/A                  |
| Benzene            | $\leq 1.71 \times 10^{-06}$          | 0.10     | $6.49 \times 10^{-04}$      | 1.32     | e              | $\leq 1.71 \times 10^{-05}$                      | $4.92 \times 10^{-04}$      | ↓ ≥96.53             |
| Benzo(a)pyrene     | $\leq 5.31 \times 10^{-09}$          | 0.04     | $7.36 \times 10^{-07}$      | 1.29     | c              | $\leq 1.27 \times 10^{-07}$                      | $5.71 \times 10^{-07}$      | ↓ ≥77.70             |
| Benzoic Acid       | $1.37 \times 10^{-01}$               | 0.17     | N/A                         | N/A      | N/A            | $7.94 \times 10^{-01}$                           | N/A                         | N/A                  |
| Benzyl Acetate     | $\leq 3.00 \times 10^{-05}$          | 0.10     | N/A                         | N/A      | N/A            | $\leq 3.00 \times 10^{-04}$                      | N/A                         | N/A                  |
| β-Nicotyrine       | $\leq 8.25 \times 10^{-06}$          | 0.17     | N/A                         | N/A      | N/A            | $\leq 4.79 \times 10^{-05}$                      | N/A                         | N/A                  |
| Cadmium            | $\leq 5.25 \times 10^{-09}$          | 0.10     | $\leq 3.50 \times 10^{-07}$ | 1.32     | e              | $\leq 5.26 \times 10^{-08}$                      | $\leq 2.65 \times 10^{-07}$ | NC                   |
| Carbon Monoxide    | $\leq 5.25 \times 10^{-03}$          | 0.04     | $5.31 \times 10^{-01}$      | 1.32     | e              | $\leq 1.26 \times 10^{-01}$                      | $4.02 \times 10^{-01}$      | ↓ ≥68.75             |
| Chromium           | NDBF                                 | 0.10     | $\leq 5.50 \times 10^{-07}$ | 1.32     | e              | NDFB                                             | $\leq 4.17 \times 10^{-07}$ | NC                   |
| Copper             | $\leq 6.56 \times 10^{-08}$          | 0.10     | N/A                         | N/A      | N/A            | $\leq 6.57 \times 10^{-07}$                      | N/A                         | N/A                  |
| Cotinine           | $6.57 \times 10^{-06}$               | 0.17     | N/A                         | N/A      | N/A            | $3.81 \times 10^{-05}$                           | N/A                         | N/A                  |
| Crotonaldehyde     | $\leq 3.11 \times 10^{-06}$          | 0.10     | $4.14 \times 10^{-03}$      | 1.32     | e              | $\leq 3.12 \times 10^{-05}$                      | $3.14 \times 10^{-03}$      | ↓ ≥99.01             |
| Diacetyl           | $\leq 8.70 \times 10^{-07}$          | 0.10     | $4.30 \times 10^{-02}$      | 1.2      | d              | $\leq 8.71 \times 10^{-06}$                      | $3.58 \times 10^{-02}$      | ↓ ≥99.98             |
| Diethylene Glycol  | $\leq 1.20 \times 10^{-04}$          | 0.10     | N/A                         | N/A      | N/A            | $\leq 1.20 \times 10^{-03}$                      | N/A                         | N/A                  |
| Ethyl Acetate      | $\leq 1.30 \times 10^{-04}$          | 0.04     | N/A                         | N/A      | N/A            | $\leq 3.45 \times 10^{-03}$                      | N/A                         | N/A                  |
| Ethyl Acetoacetate | $\leq 2.40 \times 10^{-06}$          | 0.10     | N/A                         | N/A      | N/A            | $\leq 2.40 \times 10^{-05}$                      | N/A                         | N/A                  |
| Ethylene Glycol    | $\leq 1.09 \times 10^{-04}$          | 0.10     | N/A                         | N/A      | N/A            | $\leq 1.09 \times 10^{-03}$                      | N/A                         | N/A                  |
| Formaldehyde       | $6.03 \times 10^{-05}$               | 0.17     | $5.53 \times 10^{-03}$      | 1.32     | e              | $3.50 \times 10^{-04}$                           | $4.19 \times 10^{-03}$      | ↓ 91.64              |
| Furfural           | $\leq 4.20 \times 10^{-05}$          | 0.10     | $3.11 \times 10^{-02}$      | 1.29     | c              | $\leq 4.20 \times 10^{-04}$                      | $2.41 \times 10^{-02}$      | ↓ ≥98.26             |
| Glycerol           | $2.12 \times 10^{+00}$               | 0.17     | $4.63 \times 10^{+00}$      | 1.32     | e              | $1.23 \times 10^{+01}$                           | $3.51 \times 10^{+00}$      | 251.45               |

|                  |                         |      |                         |      |     |                         |                         |          |
|------------------|-------------------------|------|-------------------------|------|-----|-------------------------|-------------------------|----------|
| Glycidol         | NR                      | 0.10 | 5.71×10 <sup>-03</sup>  | 1.29 | c   | NR                      | 4.43×10 <sup>-03</sup>  | N/A      |
| Gold             | ≤6.33×10 <sup>-09</sup> | 0.04 | N/A                     | N/A  | N/A | ≤1.52×10 <sup>-07</sup> | N/A                     | N/A      |
| Isoamyl Acetate  | ≤4.80×10 <sup>-05</sup> | 0.10 | N/A                     | N/A  | N/A | ≤4.80×10 <sup>-04</sup> | N/A                     | N/A      |
| Isobutyl Acetate | ≤3.00×10 <sup>-05</sup> | 0.10 | N/A                     | N/A  | N/A | ≤3.00×10 <sup>-04</sup> | N/A                     | N/A      |
| Isobutyraldehyde | ≤8.26×10 <sup>-07</sup> | 0.10 | N/A                     | N/A  | N/A | ≤8.27×10 <sup>-06</sup> | N/A                     | N/A      |
| Isoprene         | ≤4.06×10 <sup>-06</sup> | 0.04 | 2.35×10 <sup>-03</sup>  | 1.32 | e   | ≤9.72×10 <sup>-05</sup> | 1.78×10 <sup>-03</sup>  | ↓ ≥94.54 |
| Lead             | ≤4.55×10 <sup>-08</sup> | 0.10 | 2.23×10 <sup>-06</sup>  | 1.29 | c   | ≤4.55×10 <sup>-07</sup> | 1.73×10 <sup>-06</sup>  | ↓ ≥73.65 |
| Menthol          | ≤1.22×10 <sup>-04</sup> | 0.10 | 4.10×10 <sup>-04</sup>  | 1.20 | d   | ≤1.22×10 <sup>-03</sup> | 3.42×10 <sup>-04</sup>  | NC       |
| Methyl Acetate   | ≤3.60×10 <sup>-05</sup> | 0.10 | N/A                     | N/A  | N/A | ≤3.60×10 <sup>-04</sup> | N/A                     | N/A      |
| Myosmine         | ≤1.93×10 <sup>-05</sup> | 0.04 | N/A                     | N/A  | N/A | ≤4.62×10 <sup>-04</sup> | N/A                     | N/A      |
| n-Butyraldehyde  | ≤1.76×10 <sup>-06</sup> | 0.10 | 2.61×10 <sup>-02</sup>  | 1.32 | e   | ≤1.76×10 <sup>-05</sup> | 1.98×10 <sup>-02</sup>  | ↓ ≥99.91 |
| Nickel           | ≤1.05×10 <sup>-07</sup> | 0.10 | ≤5.50×10 <sup>-07</sup> | 1.32 | e   | ≤1.05×10 <sup>-06</sup> | ≤4.17×10 <sup>-07</sup> | NC       |
| Nicotine         | 1.72×10 <sup>-01</sup>  | 0.17 | 1.32×10 <sup>+00</sup>  | 1.32 | e   | 1.00×10 <sup>+00</sup>  | 1.00×10 <sup>+00</sup>  | N/A      |
| Nicotine-N-Oxide | ≤8.72×10 <sup>-06</sup> | 0.10 | N/A                     | N/A  | N/A | ≤8.73×10 <sup>-05</sup> | N/A                     | N/A      |
| NNK              | ≤7.53×10 <sup>-09</sup> | 0.10 | 6.70×10 <sup>-06</sup>  | 1.32 | e   | ≤7.54×10 <sup>-08</sup> | 5.08×10 <sup>-06</sup>  | ↓ ≥98.52 |
| NNN              | ≤4.92×10 <sup>-09</sup> | 0.10 | 1.72×10 <sup>-05</sup>  | 1.32 | e   | ≤4.93×10 <sup>-08</sup> | 1.30×10 <sup>-05</sup>  | ↓ ≥99.62 |
| Nornicotine      | 2.42×10 <sup>-05</sup>  | 0.04 | N/A                     | N/A  | N/A | 5.78×10 <sup>-04</sup>  | N/A                     | N/A      |
| Propionic Acid   | ≤1.80×10 <sup>-05</sup> | 0.10 | N/A                     | N/A  | N/A | ≤1.80×10 <sup>-04</sup> | N/A                     | N/A      |
| Propylene Glycol | 8.30×10 <sup>-01</sup>  | 0.17 | 1.75×10 <sup>-01</sup>  | 1.29 | c   | 4.82×10 <sup>+00</sup>  | 1.36×10 <sup>-01</sup>  | 3450.82  |
| Propylene Oxide  | ≤1.56×10 <sup>-06</sup> | 0.10 | 1.48×10 <sup>-04</sup>  | 1.32 | e   | ≤1.56×10 <sup>-05</sup> | 1.12×10 <sup>-04</sup>  | ↓ ≥86.07 |
| Toluene          | ≤6.12×10 <sup>-06</sup> | 0.10 | 2.59×10 <sup>-03</sup>  | 1.32 | e   | ≤6.12×10 <sup>-05</sup> | 1.96×10 <sup>-03</sup>  | ↓ ≥96.88 |
| Water            | 4.31×10 <sup>-01</sup>  | 0.17 | 3.65×10 <sup>+01</sup>  | 1.32 | e   | 2.50×10 <sup>+00</sup>  | 2.77×10 <sup>+01</sup>  | ↓ 90.96  |

Average % Difference, Excluding Glycerol, PG and Water. a: Jaccard et al. 2019 b: Moldoveanu et al. 2017 c: Helen et al. 2018 d: Uchiyama et al. 2018 e: Schaller et al. 2016 f: Pappas et al. 2014 g: Roemer et al. 2012 h: IQOS PMTA, 2019.

**Table S7.** Comparison of HPHC and Chemical Intense Aerosol Levels in Virginia Tobacco 3.0% and Smoke Levels in 3R4F Reference Cigarette.

| HPHC or Chemical   | JUUL Virginia Tobacco 3.0% 3R4F (mg/cig) |          |                        |          |                | Chemical and HPHC Normalized by Nicotine (mg/mg) |                        | % Difference vs_3R4F |
|--------------------|------------------------------------------|----------|------------------------|----------|----------------|--------------------------------------------------|------------------------|----------------------|
|                    | HPHC or Chemical                         | Nicotine | HPHC or Chemical       | Nicotine | Source Journal | JUUL Virginia Tobacco 3.0%                       | 3R4F                   |                      |
| 1-Aminonaphthalene | ≤8.19×10 <sup>-10</sup>                  | 0.07     | 2.91×10 <sup>-05</sup> | 1.99     | a              | ≤1.22×10 <sup>-08</sup>                          | 1.46×10 <sup>-05</sup> | ↓ ≥99.92             |
| 1-Butanol          | ≤3.00×10 <sup>-05</sup>                  | 0.05     | N/A                    | N/A      | N/A            | ≤5.68×10 <sup>-04</sup>                          | N/A                    | N/A                  |
| 1,3-Butadiene      | ≤2.85×10 <sup>-06</sup>                  | 0.07     | 1.00×10 <sup>-01</sup> | 1.99     | a              | ≤4.23×10 <sup>-05</sup>                          | 5.03×10 <sup>-02</sup> | ↓ ≥99.92             |
| 2-Aminonaphthalene | ≤3.56×10 <sup>-10</sup>                  | 0.07     | 1.81×10 <sup>-05</sup> | 1.99     | a              | ≤5.29×10 <sup>-09</sup>                          | 9.10×10 <sup>-06</sup> | ↓ ≥99.94             |
| 4-Aminobiphenyl    | ≤1.43×10 <sup>-10</sup>                  | 0.07     | 3.91×10 <sup>-06</sup> | 1.99     | a              | ≤2.12×10 <sup>-09</sup>                          | 1.96×10 <sup>-06</sup> | ↓ ≥99.89             |

|                       |                             |      |                             |      |     |                             |                             |          |
|-----------------------|-----------------------------|------|-----------------------------|------|-----|-----------------------------|-----------------------------|----------|
| Acetaldehyde          | $4.35 \times 10^{-05}$      | 0.11 | $1.84 \times 10^{+00}$      | 1.99 | a   | $4.13 \times 10^{-04}$      | $9.24 \times 10^{-01}$      | ↓ 99.96  |
| Acetyl<br>Propionyl   | $\leq 1.76 \times 10^{-06}$ | 0.05 | $9.19 \times 10^{-02}$      | 1.99 | b   | $\leq 3.33 \times 10^{-05}$ | $4.62 \times 10^{-02}$      | ↓ ≥99.93 |
| Acrolein              | $\leq 2.01 \times 10^{-05}$ | 0.11 | $1.80 \times 10^{-01}$      | 1.99 | a   | $\leq 1.91 \times 10^{-04}$ | $9.05 \times 10^{-02}$      | ↓ ≥99.79 |
| Acrylonitrile         | $\leq 3.20 \times 10^{-06}$ | 0.05 | $2.05 \times 10^{-02}$      | 1.99 | a   | $\leq 6.06 \times 10^{-05}$ | $1.03 \times 10^{-02}$      | ↓ ≥99.41 |
| Ammonia               | $\leq 3.99 \times 10^{-05}$ | 0.07 | $3.40 \times 10^{-02}$      | 1.99 | a   | $\leq 5.92 \times 10^{-04}$ | $1.71 \times 10^{-02}$      | ↓ ≥96.53 |
| Anabasine             | $\leq 2.87 \times 10^{-06}$ | 0.07 | N/A                         | N/A  | N/A | $\leq 4.27 \times 10^{-05}$ | N/A                         | N/A      |
| Anatabine             | $\leq 2.38 \times 10^{-06}$ | 0.07 | N/A                         | N/A  | N/A | $\leq 3.53 \times 10^{-05}$ | N/A                         | N/A      |
| Benzene               | $\leq 1.71 \times 10^{-06}$ | 0.05 | $8.88 \times 10^{-02}$      | 1.99 | a   | $\leq 3.23 \times 10^{-05}$ | $4.46 \times 10^{-02}$      | ↓ ≥99.93 |
| Benzo(a)pyrene        | $\leq 5.31 \times 10^{-09}$ | 0.07 | $1.51 \times 10^{-05}$      | 1.99 | a   | $\leq 7.89 \times 10^{-08}$ | $7.59 \times 10^{-06}$      | ↓ ≥98.96 |
| Benzoic Acid          | $8.41 \times 10^{-02}$      | 0.11 | N/A                         | N/A  | N/A | $7.97 \times 10^{-01}$      | N/A                         | N/A      |
| Benzyl<br>Acetate     | $\leq 3.00 \times 10^{-05}$ | 0.05 | N/A                         | N/A  | N/A | $\leq 5.68 \times 10^{-04}$ | N/A                         | N/A      |
| β-Nicotyrine          | $\leq 8.25 \times 10^{-06}$ | 0.11 | N/A                         | N/A  | N/A | $\leq 7.82 \times 10^{-05}$ | N/A                         | N/A      |
| Cadmium               | $\leq 5.25 \times 10^{-09}$ | 0.05 | $9.32 \times 10^{-05}$      | 1.99 | a   | $\leq 9.94 \times 10^{-08}$ | $4.68 \times 10^{-05}$      | ↓ ≥99.79 |
| Carbon<br>Monoxide    | $\leq 5.25 \times 10^{-03}$ | 0.07 | $3.05 \times 10^{+01}$      | 1.99 | a   | $\leq 7.80 \times 10^{-02}$ | $1.53 \times 10^{+01}$      | ↓ ≥99.49 |
| Chromium              | NDFB                        | 0.05 | $\leq 1.19 \times 10^{-05}$ | 1.74 | c   | NDFB                        | $\leq 6.84 \times 10^{-06}$ | NC       |
| Copper                | $\leq 2.84 \times 10^{-07}$ | 0.05 | N/A                         | N/A  | N/A | $\leq 5.39 \times 10^{-06}$ | N/A                         | N/A      |
| Cotinine              | $\leq 9.37 \times 10^{-07}$ | 0.05 | N/A                         | N/A  | N/A | $\leq 1.78 \times 10^{-05}$ | N/A                         | N/A      |
| Crotonaldehyde        | $\leq 3.11 \times 10^{-06}$ | 0.05 | $5.95 \times 10^{-02}$      | 1.99 | a   | $\leq 5.90 \times 10^{-05}$ | $2.99 \times 10^{-02}$      | ↓ ≥99.80 |
| Diacetyl              | $\leq 8.70 \times 10^{-07}$ | 0.05 | $3.37 \times 10^{-01}$      | 1.99 | a   | $\leq 1.65 \times 10^{-05}$ | $1.69 \times 10^{-01}$      | ↓ ≥99.99 |
| Diethylene<br>Glycol  | $\leq 1.20 \times 10^{-04}$ | 0.05 | N/A                         | N/A  | N/A | $\leq 2.27 \times 10^{-03}$ | N/A                         | N/A      |
| Ethyl Acetate         | $\leq 1.30 \times 10^{-04}$ | 0.11 | N/A                         | N/A  | N/A | $\leq 1.23 \times 10^{-03}$ | N/A                         | N/A      |
| Ethyl<br>Acetoacetate | $\leq 2.40 \times 10^{-06}$ | 0.05 | N/A                         | N/A  | N/A | $\leq 4.54 \times 10^{-05}$ | N/A                         | N/A      |
| Ethylene<br>Glycol    | $\leq 1.09 \times 10^{-04}$ | 0.05 | N/A                         | N/A  | N/A | $\leq 2.07 \times 10^{-03}$ | N/A                         | N/A      |
| Formaldehyde          | $8.72 \times 10^{-05}$      | 0.11 | $8.71 \times 10^{-02}$      | 1.99 | a   | $8.27 \times 10^{-04}$      | $4.38 \times 10^{-02}$      | ↓ 98.11  |
| Furfural              | $\leq 4.20 \times 10^{-05}$ | 0.05 | $2.59 \times 10^{-02}$      | 1.74 | c   | $\leq 7.95 \times 10^{-04}$ | $1.49 \times 10^{-02}$      | ↓ ≥94.66 |
| Glycerol              | $2.40 \times 10^{+00}$      | 0.11 | $2.70 \times 10^{+00}$      | 1.99 | a   | $2.27 \times 10^{+01}$      | $1.36 \times 10^{+00}$      | 1574     |
| Glycidol              | NR                          | 0.05 | $1.76 \times 10^{-03}$      | 1.99 | a   | NR                          | $8.84 \times 10^{-04}$      | N/A      |
| Gold                  | $\leq 6.33 \times 10^{-09}$ | 0.07 | N/A                         | N/A  | N/A | $\leq 9.40 \times 10^{-08}$ | N/A                         | N/A      |
| Isoamyl<br>Acetate    | $\leq 4.80 \times 10^{-05}$ | 0.05 | N/A                         | N/A  | N/A | $\leq 9.09 \times 10^{-04}$ | N/A                         | N/A      |
| Isobutyl<br>Acetate   | $\leq 3.00 \times 10^{-05}$ | 0.05 | N/A                         | N/A  | N/A | $\leq 5.68 \times 10^{-04}$ | N/A                         | N/A      |
| Isobutyraldehyde      | $\leq 8.26 \times 10^{-07}$ | 0.05 | N/A                         | N/A  | N/A | $\leq 1.57 \times 10^{-05}$ | N/A                         | N/A      |
| Isoprene              | $\leq 4.06 \times 10^{-06}$ | 0.07 | $7.99 \times 10^{-01}$      | 1.99 | a   | $\leq 6.03 \times 10^{-05}$ | $4.02 \times 10^{-01}$      | ↓ ≥99.98 |
| Lead                  | NDFB                        | 0.05 | $3.12 \times 10^{-05}$      | 1.74 | c   | NDFB                        | $1.79 \times 10^{-05}$      | NC       |
| Menthol               | $\leq 1.22 \times 10^{-04}$ | 0.05 | $\leq 1.00 \times 10^{-05}$ | 2.10 | d   | $\leq 2.31 \times 10^{-03}$ | $\leq 4.76 \times 10^{-06}$ | NC       |
| Methyl<br>Acetate     | $\leq 3.60 \times 10^{-05}$ | 0.05 | N/A                         | N/A  | N/A | $\leq 6.82 \times 10^{-04}$ | N/A                         | N/A      |
| Myosmine              | $\leq 1.93 \times 10^{-05}$ | 0.07 | N/A                         | N/A  | N/A | $\leq 2.86 \times 10^{-04}$ | N/A                         | N/A      |
| n-<br>Butyraldehyde   | $\leq 1.76 \times 10^{-06}$ | 0.05 | $9.30 \times 10^{-02}$      | 1.99 | a   | $\leq 3.33 \times 10^{-05}$ | $4.67 \times 10^{-02}$      | ↓ ≥99.93 |
| Nickel                | $\leq 4.55 \times 10^{-07}$ | 0.05 | $\leq 1.29 \times 10^{-05}$ | 1.74 | c   | $\leq 8.62 \times 10^{-06}$ | $\leq 7.41 \times 10^{-06}$ | NC       |
| Nicotine              | $1.05 \times 10^{-01}$      | 0.11 | $1.99 \times 10^{+00}$      | 1.99 | a   | $1.00 \times 10^{+00}$      | $1.00 \times 10^{+00}$      | N/A      |

|                  |                             |      |                        |      |     |                             |                        |                |
|------------------|-----------------------------|------|------------------------|------|-----|-----------------------------|------------------------|----------------|
| Nicotine-N-Oxide | $\leq 8.72 \times 10^{-06}$ | 0.05 | N/A                    | N/A  | N/A | $\leq 1.65 \times 10^{-04}$ | N/A                    | N/A            |
| NNK              | $\leq 7.53 \times 10^{-09}$ | 0.05 | $2.95 \times 10^{-04}$ | 1.99 | a   | $\leq 1.43 \times 10^{-07}$ | $1.48 \times 10^{-04}$ | ↓ $\geq 99.90$ |
| NNN              | $\leq 4.92 \times 10^{-09}$ | 0.05 | $3.37 \times 10^{-04}$ | 1.99 | a   | $\leq 9.32 \times 10^{-08}$ | $1.69 \times 10^{-04}$ | ↓ $\geq 99.94$ |
| Normicotine      | $1.66 \times 10^{-05}$      | 0.07 | N/A                    | N/A  | N/A | $2.47 \times 10^{-04}$      | N/A                    | N/A            |
| Propionic Acid   | $\leq 7.80 \times 10^{-05}$ | 0.04 | N/A                    | N/A  | N/A | $\leq 1.79 \times 10^{-03}$ | N/A                    | N/A            |
| Propylene Glycol | $9.19 \times 10^{-01}$      | 0.11 | $2.37 \times 10^{-02}$ | 1.74 | c   | $8.71 \times 10^{+00}$      | $1.36 \times 10^{-02}$ | 63861.53       |
| Propylene Oxide  | $\leq 1.56 \times 10^{-06}$ | 0.05 | $1.00 \times 10^{+00}$ | 1.99 | a   | $\leq 2.96 \times 10^{-05}$ | $5.03 \times 10^{-01}$ | ↓ $\geq 99.99$ |
| Toluene          | $\leq 6.12 \times 10^{-06}$ | 0.05 | $1.53 \times 10^{-01}$ | 1.99 | a   | $\leq 1.16 \times 10^{-04}$ | $7.69 \times 10^{-02}$ | ↓ $\geq 99.85$ |
| Water            | $4.57 \times 10^{-01}$      | 0.11 | $1.58 \times 10^{+01}$ | 1.89 | e   | $4.33 \times 10^{+00}$      | $8.36 \times 10^{+00}$ | ↓ 48.2         |

Average % Difference, Excluding Glycerol, PG and Water. a: Jaccard et al. 2019 b: Moldoveanu et al. 2017 c: Helen et al. 2018 d: Uchiyama et al. 2018 e: Schaller et al. 2016 f: Pappas et al. 2014 g: Roemer et al. 2012 h: IQOS PMTA, 2019.

**Table S8.** Comparison of HPHC and Chemical Non-Intense Aerosol Levels in Virginia Tobacco 3.0% and Smoke Levels in 3R4F Reference Cigarette.

| HPHC Chemical      | JUUL Virginia Tobacco 3.0% (mg/puff) |             | 3R4F (mg/cig)               |             |                | Chemical and HPHC Normalized by Nicotine (mg/mg) |                             | % Difference vs_3R4F |
|--------------------|--------------------------------------|-------------|-----------------------------|-------------|----------------|--------------------------------------------------|-----------------------------|----------------------|
|                    | HPHC Chemical                        | or Nicotine | HPHC Chemical               | or Nicotine | Source Journal | JUUL Virginia Tobacco 3.0%                       | 3R4F                        |                      |
| 1-Aminonaphthalene | $\leq 8.19 \times 10^{-10}$          | 0.07        | $1.42 \times 10^{-05}$      | 0.70        | a              | $\leq 1.22 \times 10^{-08}$                      | $2.02 \times 10^{-05}$      | ↓ $\geq 99.94$       |
| 1-Butanol          | $\leq 3.00 \times 10^{-05}$          | 0.03        | N/A                         | N/A         | N/A            | $\leq 1.02 \times 10^{-03}$                      | N/A                         | N/A                  |
| 1,3-Butadiene      | $\leq 2.85 \times 10^{-06}$          | 0.07        | $3.79 \times 10^{-02}$      | 0.70        | a              | $\leq 4.24 \times 10^{-05}$                      | $5.40 \times 10^{-02}$      | ↓ $\geq 99.92$       |
| 2-Aminonaphthalene | $\leq 3.56 \times 10^{-10}$          | 0.07        | $8.77 \times 10^{-06}$      | 0.70        | a              | $\leq 5.29 \times 10^{-09}$                      | $1.25 \times 10^{-05}$      | ↓ $\geq 99.96$       |
| 4-Aminobiphenyl    | $\leq 1.43 \times 10^{-10}$          | 0.07        | $1.54 \times 10^{-06}$      | 0.70        | a              | $\leq 2.13 \times 10^{-09}$                      | $2.19 \times 10^{-06}$      | ↓ $\geq 99.90$       |
| Acetaldehyde       | $3.47 \times 10^{-05}$               | 0.05        | $5.97 \times 10^{-01}$      | 0.70        | a              | $6.49 \times 10^{-04}$                           | $8.50 \times 10^{-01}$      | ↓ 99.92              |
| Acetyl Propionyl   | $\leq 1.76 \times 10^{-06}$          | 0.03        | $2.95 \times 10^{-02}$      | 0.70        | b              | $\leq 5.99 \times 10^{-05}$                      | $4.21 \times 10^{-02}$      | ↓ $\geq 99.86$       |
| Acrolein           | $\leq 2.01 \times 10^{-05}$          | 0.06        | $5.32 \times 10^{-02}$      | 0.70        | a              | $\leq 3.55 \times 10^{-04}$                      | $7.58 \times 10^{-02}$      | ↓ $\geq 99.53$       |
| Acrylonitrile      | $\leq 3.20 \times 10^{-06}$          | 0.03        | $5.23 \times 10^{-03}$      | 0.70        | a              | $\leq 1.09 \times 10^{-04}$                      | $7.45 \times 10^{-03}$      | ↓ $\geq 98.53$       |
| Ammonia            | $\leq 3.99 \times 10^{-05}$          | 0.07        | $9.64 \times 10^{-03}$      | 0.70        | a              | $\leq 5.92 \times 10^{-04}$                      | $1.37 \times 10^{-02}$      | ↓ $\geq 95.69$       |
| Anabasine          | $\leq 2.87 \times 10^{-06}$          | 0.07        | N/A                         | N/A         | N/A            | $\leq 4.27 \times 10^{-05}$                      | N/A                         | N/A                  |
| Anatabine          | $\leq 2.38 \times 10^{-06}$          | 0.07        | N/A                         | N/A         | N/A            | $\leq 3.53 \times 10^{-05}$                      | N/A                         | N/A                  |
| Benzene            | $\leq 1.71 \times 10^{-06}$          | 0.03        | $3.36 \times 10^{-02}$      | 0.70        | a              | $\leq 5.82 \times 10^{-05}$                      | $4.79 \times 10^{-02}$      | ↓ $\geq 99.88$       |
| Benzo(a)pyrene     | $\leq 5.31 \times 10^{-09}$          | 0.07        | $6.30 \times 10^{-06}$      | 0.70        | a              | $\leq 7.89 \times 10^{-08}$                      | $8.97 \times 10^{-06}$      | ↓ $\geq 99.12$       |
| Benzoic Acid       | $4.79 \times 10^{-02}$               | 0.06        | N/A                         | N/A         | N/A            | $8.46 \times 10^{-01}$                           | N/A                         | N/A                  |
| Benzyl Acetate     | $\leq 3.00 \times 10^{-05}$          | 0.03        | N/A                         | N/A         | N/A            | $\leq 1.02 \times 10^{-03}$                      | N/A                         | N/A                  |
| β-Nicotyrine       | $\leq 8.25 \times 10^{-06}$          | 0.06        | N/A                         | N/A         | N/A            | $\leq 1.46 \times 10^{-04}$                      | N/A                         | N/A                  |
| Cadmium            | $\leq 5.25 \times 10^{-09}$          | 0.03        | $2.45 \times 10^{-05}$      | 0.70        | a              | $\leq 1.79 \times 10^{-07}$                      | $3.49 \times 10^{-05}$      | ↓ $\geq 99.49$       |
| Carbon Monoxide    | $\leq 5.25 \times 10^{-03}$          | 0.07        | $1.00 \times 10^{+01}$      | 0.70        | a              | $\leq 7.80 \times 10^{-02}$                      | $1.42 \times 10^{+01}$      | ↓ $\geq 99.45$       |
| Chromium           | NDFB                                 | 0.03        | $\leq 8.80 \times 10^{-07}$ | 0.70        | f              | NDFB                                             | $\leq 1.25 \times 10^{-06}$ | NC                   |

|                    |                             |      |                             |      |     |                             |                             |                |
|--------------------|-----------------------------|------|-----------------------------|------|-----|-----------------------------|-----------------------------|----------------|
| Copper             | $\leq 2.84 \times 10^{-07}$ | 0.03 | N/A                         | N/A  | N/A | $\leq 9.70 \times 10^{-06}$ | N/A                         | N/A            |
| Cotinine           | $\leq 4.06 \times 10^{-06}$ | 0.03 | N/A                         | N/A  | N/A | $\leq 1.39 \times 10^{-04}$ | N/A                         | N/A            |
| Crotonaldehyde     | $\leq 3.11 \times 10^{-06}$ | 0.03 | $9.89 \times 10^{-03}$      | 0.70 | a   | $\leq 1.06 \times 10^{-04}$ | $1.41 \times 10^{-02}$      | ↓ $\geq 99.25$ |
| Diacetyl           | $\leq 8.70 \times 10^{-07}$ | 0.03 | $1.15 \times 10^{-01}$      | 0.70 | b   | $\leq 2.97 \times 10^{-05}$ | $1.64 \times 10^{-01}$      | ↓ $\geq 99.98$ |
| Diethylene Glycol  | $\leq 1.20 \times 10^{-04}$ | 0.03 | N/A                         | N/A  | N/A | $\leq 4.09 \times 10^{-03}$ | N/A                         | N/A            |
| Ethyl Acetate      | $\leq 1.30 \times 10^{-04}$ | 0.03 | N/A                         | N/A  | N/A | $\leq 4.43 \times 10^{-03}$ | N/A                         | N/A            |
| Ethyl Acetoacetate | $\leq 2.40 \times 10^{-06}$ | 0.03 | N/A                         | N/A  | N/A | $\leq 8.19 \times 10^{-05}$ | N/A                         | N/A            |
| Ethylene Glycol    | $\leq 1.09 \times 10^{-04}$ | 0.03 | N/A                         | N/A  | N/A | $\leq 3.73 \times 10^{-03}$ | N/A                         | N/A            |
| Formaldehyde       | $7.24 \times 10^{-05}$      | 0.05 | $2.47 \times 10^{-02}$      | 0.70 | a   | $1.35 \times 10^{-03}$      | $3.52 \times 10^{-02}$      | ↓ 96.16        |
| Furfural           | $\leq 4.20 \times 10^{-05}$ | 0.03 | $1.40 \times 10^{-02}$      | 0.76 | d   | $\leq 1.43 \times 10^{-03}$ | $1.84 \times 10^{-02}$      | ↓ $\geq 92.22$ |
| Glycerol           | $1.23 \times 10^{+00}$      | 0.05 | $2.70 \times 10^{+00}$      | 0.70 | a   | $2.31 \times 10^{+01}$      | $3.85 \times 10^{+00}$      | 499.45         |
| Glycidol           | NR                          | 0.03 | N/A                         | N/A  | N/A | NR                          | N/A                         | N/A            |
| Gold               | $\leq 6.33 \times 10^{-09}$ | 0.07 | N/A                         | N/A  | N/A | $\leq 9.41 \times 10^{-08}$ | N/A                         | N/A            |
| Isoamyl Acetate    | $\leq 4.80 \times 10^{-05}$ | 0.03 | N/A                         | N/A  | N/A | $\leq 1.64 \times 10^{-03}$ | N/A                         | N/A            |
| Isobutyl Acetate   | $\leq 3.00 \times 10^{-05}$ | 0.03 | N/A                         | N/A  | N/A | $\leq 1.02 \times 10^{-03}$ | N/A                         | N/A            |
| Isobutyraldehyde   | $\leq 8.26 \times 10^{-07}$ | 0.03 | N/A                         | N/A  | N/A | $\leq 2.82 \times 10^{-05}$ | N/A                         | N/A            |
| Isoprene           | $\leq 4.06 \times 10^{-06}$ | 0.07 | $2.88 \times 10^{-01}$      | 0.70 | a   | $\leq 6.03 \times 10^{-05}$ | $4.10 \times 10^{-01}$      | ↓ $\geq 99.99$ |
| Lead               | $\leq 4.55 \times 10^{-08}$ | 0.03 | $9.20 \times 10^{-06}$      | 0.70 | f   | $\leq 1.55 \times 10^{-06}$ | $1.31 \times 10^{-05}$      | ↓ $\geq 88.16$ |
| Menthol            | $\leq 1.22 \times 10^{-04}$ | 0.03 | $\leq 1.00 \times 10^{-05}$ | 0.76 | a   | $\leq 4.17 \times 10^{-03}$ | $\leq 1.32 \times 10^{-05}$ | NC             |
| Methyl Acetate     | $\leq 3.60 \times 10^{-05}$ | 0.03 | N/A                         | N/A  | N/A | $\leq 1.23 \times 10^{-03}$ | N/A                         | N/A            |
| Myosmine           | $\leq 1.93 \times 10^{-05}$ | 0.07 | N/A                         | N/A  | N/A | $\leq 2.86 \times 10^{-04}$ | N/A                         | N/A            |
| n-Butyraldehyde    | $\leq 1.76 \times 10^{-06}$ | 0.03 | $2.84 \times 10^{-02}$      | 0.70 | a   | $\leq 5.99 \times 10^{-05}$ | $4.05 \times 10^{-02}$      | ↓ $\geq 99.85$ |
| Nickel             | $\leq 4.55 \times 10^{-07}$ | 0.06 | $\leq 3.80 \times 10^{-07}$ | 0.70 | f   | $\leq 8.03 \times 10^{-06}$ | $\leq 5.41 \times 10^{-07}$ | NC             |
| Nicotine           | $5.67 \times 10^{-02}$      | 0.06 | $7.02 \times 10^{-01}$      | 0.70 | a   | $1.00 \times 10^{+00}$      | $1.00 \times 10^{+00}$      | N/A            |
| Nicotine-N-Oxide   | $\leq 8.72 \times 10^{-06}$ | 0.03 | N/A                         | N/A  | N/A | $\leq 2.97 \times 10^{-04}$ | N/A                         | N/A            |
| NNK                | $\leq 7.53 \times 10^{-09}$ | 0.03 | $1.13 \times 10^{-04}$      | 0.70 | a   | $\leq 2.57 \times 10^{-07}$ | $1.61 \times 10^{-04}$      | ↓ $\geq 99.84$ |
| NNN                | $\leq 4.92 \times 10^{-09}$ | 0.03 | $1.31 \times 10^{-04}$      | 0.70 | a   | $\leq 1.68 \times 10^{-07}$ | $1.87 \times 10^{-04}$      | ↓ $\geq 99.91$ |
| Nornicotine        | $1.66 \times 10^{-05}$      | 0.07 | N/A                         | N/A  | N/A | $2.47 \times 10^{-04}$      | N/A                         | N/A            |
| Propionic Acid     | $\leq 7.80 \times 10^{-05}$ | 0.03 | N/A                         | N/A  | N/A | $\leq 2.66 \times 10^{-03}$ | N/A                         | N/A            |
| Propylene Glycol   | $5.01 \times 10^{-01}$      | 0.06 | $3.20 \times 10^{-03}$      | 0.76 | d   | $8.85 \times 10^{+00}$      | $4.21 \times 10^{-03}$      | 210011.2       |
| Propylene Oxide    | $\leq 1.56 \times 10^{-06}$ | 0.03 | $2.97 \times 10^{-01}$      | 0.70 | a   | $\leq 5.32 \times 10^{-05}$ | $4.23 \times 10^{-01}$      | ↓ $\geq 99.99$ |
| Toluene            | $\leq 6.12 \times 10^{-06}$ | 0.03 | $5.14 \times 10^{-02}$      | 0.70 | a   | $\leq 2.09 \times 10^{-04}$ | $7.32 \times 10^{-02}$      | ↓ $\geq 99.72$ |
| Water              | $2.75 \times 10^{-01}$      | 0.05 | $3.20 \times 10^{+00}$      | 0.76 | d   | $5.13 \times 10^{+00}$      | $4.21 \times 10^{+00}$      | 21.78          |

Average % Difference, Excluding Glycerol, PG and Water. a: Jaccard et al. 2019 b: Moldoveanu et al. 2017 c: Helen et al. 2018 d: Uchiyama et al. 2018 e: Schaller et al. 2016 f: Pappas et al. 2014 g: Roemer et al. 2012 h: IQOS PMTA, 2019.

**Table S9.** Comparison of HPHC and Chemical Intense Aerosol Levels in Virginia Tobacco 3.0% and Aerosol Levels in IQOS Regular.

| HPHC Chemical      | JUUL Virginia Tobacco 3.0% (mg/puff) |             | IQOS (mg/cig)               |             | Source Journal | Chemical and HPHC Normalized by Nicotine (mg/mg) |                             | % Difference vs_3R4F |
|--------------------|--------------------------------------|-------------|-----------------------------|-------------|----------------|--------------------------------------------------|-----------------------------|----------------------|
|                    | HPHC Chemical                        | or Nicotine | HPHC Chemical               | or Nicotine |                | JUUL Virginia Tobacco 3.0%                       | 3R4F                        |                      |
| 1-Aminonaphthalene | $\leq 8.19 \times 10^{-10}$          | 0.07        | $7.70 \times 10^{-08}$      | 1.32        | e              | $\leq 1.22 \times 10^{-08}$                      | $5.83 \times 10^{-08}$      | ↓ $\geq 79.16$       |
| 1-Butanol          | $\leq 3.00 \times 10^{-05}$          | 0.05        | N/A                         | N/A         | N/A            | $\leq 5.68 \times 10^{-04}$                      | N/A                         | N/A                  |
| 1,3-Butadiene      | $\leq 2.85 \times 10^{-06}$          | 0.07        | $2.94 \times 10^{-04}$      | 1.32        | e              | $\leq 4.23 \times 10^{-05}$                      | $2.23 \times 10^{-04}$      | ↓ $\geq 80.99$       |
| 2-Aminonaphthalene | $\leq 3.56 \times 10^{-10}$          | 0.07        | $4.60 \times 10^{-08}$      | 1.32        | e              | $\leq 5.29 \times 10^{-09}$                      | $3.48 \times 10^{-08}$      | ↓ $\geq 84.82$       |
| 4-Aminobiphenyl    | $\leq 1.43 \times 10^{-10}$          | 0.07        | $9.00 \times 10^{-09}$      | 1.29        | c              | $\leq 2.12 \times 10^{-09}$                      | $6.98 \times 10^{-09}$      | ↓ $\geq 69.55$       |
| Acetaldehyde       | $4.35 \times 10^{-05}$               | 0.11        | $2.19 \times 10^{-01}$      | 1.32        | e              | $4.13 \times 10^{-04}$                           | $1.66 \times 10^{-01}$      | -99.75               |
| Acetyl Propionyl   | $\leq 1.76 \times 10^{-06}$          | 0.05        | N/A                         | N/A         | N/A            | $\leq 3.33 \times 10^{-05}$                      | N/A                         | N/A                  |
| Acrolein           | $\leq 2.01 \times 10^{-05}$          | 0.11        | $1.13 \times 10^{-02}$      | 1.32        | e              | $\leq 1.91 \times 10^{-04}$                      | $8.56 \times 10^{-03}$      | ↓ $\geq 97.77$       |
| Acrylonitrile      | $\leq 3.20 \times 10^{-06}$          | 0.05        | $2.58 \times 10^{-04}$      | 1.32        | e              | $\leq 6.06 \times 10^{-05}$                      | $1.95 \times 10^{-04}$      | ↓ $\geq 68.99$       |
| Ammonia            | $\leq 3.99 \times 10^{-05}$          | 0.07        | $1.42 \times 10^{-02}$      | 1.32        | e              | $\leq 5.92 \times 10^{-04}$                      | $1.08 \times 10^{-02}$      | ↓ $\geq 94.50$       |
| Anabasine          | $\leq 2.87 \times 10^{-06}$          | 0.07        | N/A                         | N/A         | N/A            | $\leq 4.27 \times 10^{-05}$                      | N/A                         | N/A                  |
| Anatabine          | $\leq 2.38 \times 10^{-06}$          | 0.07        | N/A                         | N/A         | N/A            | $\leq 3.53 \times 10^{-05}$                      | N/A                         | N/A                  |
| Benzene            | $\leq 1.71 \times 10^{-06}$          | 0.05        | $6.49 \times 10^{-04}$      | 1.32        | e              | $\leq 3.23 \times 10^{-05}$                      | $4.92 \times 10^{-04}$      | ↓ $\geq 93.43$       |
| Benzo(a)pyrene     | $\leq 5.31 \times 10^{-09}$          | 0.07        | $7.36 \times 10^{-07}$      | 1.29        | c              | $\leq 7.89 \times 10^{-08}$                      | $5.71 \times 10^{-07}$      | ↓ $\geq 86.17$       |
| Benzoic Acid       | $8.41 \times 10^{-02}$               | 0.11        | N/A                         | N/A         | N/A            | $7.97 \times 10^{-01}$                           | N/A                         | N/A                  |
| Benzyl Acetate     | $\leq 3.00 \times 10^{-05}$          | 0.05        | N/A                         | N/A         | N/A            | $\leq 5.68 \times 10^{-04}$                      | N/A                         | N/A                  |
| β-Nicotyrine       | $\leq 8.25 \times 10^{-06}$          | 0.11        | N/A                         | N/A         | N/A            | $\leq 7.82 \times 10^{-05}$                      | N/A                         | N/A                  |
| Cadmium            | $\leq 5.25 \times 10^{-09}$          | 0.05        | $\leq 3.50 \times 10^{-07}$ | 1.32        | e              | $\leq 9.94 \times 10^{-08}$                      | $\leq 2.65 \times 10^{-07}$ | NC                   |
| Carbon Monoxide    | $\leq 5.25 \times 10^{-03}$          | 0.07        | $5.31 \times 10^{-01}$      | 1.32        | e              | $\leq 7.80 \times 10^{-02}$                      | $4.02 \times 10^{-01}$      | ↓ $\geq 80.62$       |
| Chromium           | NDFB                                 | 0.05        | $\leq 5.50 \times 10^{-07}$ | 1.32        | e              | NDFB                                             | $\leq 4.17 \times 10^{-07}$ | NC                   |
| Copper             | $\leq 2.84 \times 10^{-07}$          | 0.05        | N/A                         | N/A         | N/A            | $\leq 5.39 \times 10^{-06}$                      | N/A                         | N/A                  |
| Cotinine           | $\leq 9.37 \times 10^{-07}$          | 0.05        | N/A                         | N/A         | N/A            | $\leq 1.78 \times 10^{-05}$                      | N/A                         | N/A                  |
| Crotonaldehyde     | $\leq 3.11 \times 10^{-06}$          | 0.05        | $4.14 \times 10^{-03}$      | 1.32        | e              | $\leq 5.90 \times 10^{-05}$                      | $3.14 \times 10^{-03}$      | ↓ $\geq 98.12$       |
| Diacetyl           | $\leq 8.70 \times 10^{-07}$          | 0.05        | $4.30 \times 10^{-02}$      | 1.20        | d              | $\leq 1.65 \times 10^{-05}$                      | $3.58 \times 10^{-02}$      | ↓ $\geq 99.95$       |
| Diethylene Glycol  | $\leq 1.20 \times 10^{-04}$          | 0.05        | N/A                         | N/A         | N/A            | $\leq 2.27 \times 10^{-03}$                      | N/A                         | N/A                  |
| Ethyl Acetate      | $\leq 1.30 \times 10^{-04}$          | 0.11        | N/A                         | N/A         | N/A            | $\leq 1.23 \times 10^{-03}$                      | N/A                         | N/A                  |
| Ethyl Acetoacetate | $\leq 2.40 \times 10^{-06}$          | 0.05        | N/A                         | N/A         | N/A            | $\leq 4.54 \times 10^{-05}$                      | N/A                         | N/A                  |
| Ethylene Glycol    | $\leq 1.09 \times 10^{-04}$          | 0.05        | N/A                         | N/A         | N/A            | $\leq 2.07 \times 10^{-03}$                      | N/A                         | N/A                  |
| Formaldehyde       | $8.72 \times 10^{-05}$               | 0.11        | $5.53 \times 10^{-03}$      | 1.32        | e              | $8.27 \times 10^{-04}$                           | $4.19 \times 10^{-03}$      | ↓ 80.27              |
| Furfural           | $\leq 4.20 \times 10^{-05}$          | 0.05        | $3.11 \times 10^{-02}$      | 1.29        | c              | $\leq 7.95 \times 10^{-04}$                      | $2.41 \times 10^{-02}$      | ↓ $\geq 96.70$       |
| Glycerol           | $2.40 \times 10^{+00}$               | 0.11        | $4.63 \times 10^{+00}$      | 1.32        | e              | $2.27 \times 10^{+01}$                           | $3.51 \times 10^{+00}$      | 547.53               |

|                  |                         |      |                         |      |     |                         |                         |          |
|------------------|-------------------------|------|-------------------------|------|-----|-------------------------|-------------------------|----------|
| Glycidol         | NR                      | 0.05 | 5.71×10 <sup>-03</sup>  | 1.29 | c   | NR                      | 4.43×10 <sup>-03</sup>  | N/A      |
| Gold             | ≤6.33×10 <sup>-09</sup> | 0.07 | N/A                     | N/A  | N/A | ≤9.40×10 <sup>-08</sup> | N/A                     | N/A      |
| Isoamyl Acetate  | ≤4.80×10 <sup>-05</sup> | 0.05 | N/A                     | N/A  | N/A | ≤9.09×10 <sup>-04</sup> | N/A                     | N/A      |
| Isobutyl Acetate | ≤3.00×10 <sup>-05</sup> | 0.05 | N/A                     | N/A  | N/A | ≤5.68×10 <sup>-04</sup> | N/A                     | N/A      |
| Isobutyraldehyde | ≤8.26×10 <sup>-07</sup> | 0.05 | N/A                     | N/A  | N/A | ≤1.57×10 <sup>-05</sup> | N/A                     | N/A      |
| Isoprene         | ≤4.06×10 <sup>-06</sup> | 0.07 | 2.35×10 <sup>-03</sup>  | 1.32 | e   | ≤6.03×10 <sup>-05</sup> | 1.78×10 <sup>-03</sup>  | ↓ ≥96.61 |
| Lead             | NDFB                    | 0.05 | 2.23×10 <sup>-06</sup>  | 1.29 | c   | NDFB                    | 1.73×10 <sup>-06</sup>  | NC       |
| Menthol          | ≤1.22×10 <sup>-04</sup> | 0.05 | 4.10×10 <sup>-04</sup>  | 1.20 | d   | ≤2.31×10 <sup>-03</sup> | 3.42×10 <sup>-04</sup>  | NC       |
| Methyl Acetate   | ≤3.60×10 <sup>-05</sup> | 0.05 | N/A                     | N/A  | N/A | ≤6.82×10 <sup>-04</sup> | N/A                     | N/A      |
| Myosmine         | ≤1.93×10 <sup>-05</sup> | 0.07 | N/A                     | N/A  | N/A | ≤2.86×10 <sup>-04</sup> | N/A                     | N/A      |
| n-Butyraldehyde  | ≤1.76×10 <sup>-06</sup> | 0.05 | 2.61×10 <sup>-02</sup>  | 1.32 | e   | ≤3.33×10 <sup>-05</sup> | 1.98×10 <sup>-02</sup>  | ↓ ≥99.83 |
| Nickel           | ≤4.55×10 <sup>-07</sup> | 0.05 | ≤5.50×10 <sup>-07</sup> | 1.32 | e   | ≤8.62×10 <sup>-06</sup> | ≤4.17×10 <sup>-07</sup> | NC       |
| Nicotine         | 1.05×10 <sup>-01</sup>  | 0.11 | 1.32×10 <sup>+00</sup>  | 1.32 | e   | 1.00×10 <sup>+00</sup>  | 1.00×10 <sup>+00</sup>  | N/A      |
| Nicotine-N-Oxide | ≤8.72×10 <sup>-06</sup> | 0.05 | N/A                     | N/A  | N/A | ≤1.65×10 <sup>-04</sup> | N/A                     | N/A      |
| NNK              | ≤7.53×10 <sup>-09</sup> | 0.05 | 6.70×10 <sup>-06</sup>  | 1.32 | e   | ≤1.43×10 <sup>-07</sup> | 5.08×10 <sup>-06</sup>  | ↓ ≥97.19 |
| NNN              | ≤4.92×10 <sup>-09</sup> | 0.05 | 1.72×10 <sup>-05</sup>  | 1.32 | e   | ≤9.32×10 <sup>-08</sup> | 1.30×10 <sup>-05</sup>  | ↓ ≥99.28 |
| Nornicotine      | 1.66×10 <sup>-05</sup>  | 0.07 | N/A                     | N/A  | N/A | 2.47×10 <sup>-04</sup>  | N/A                     | N/A      |
| Propionic Acid   | ≤7.80×10 <sup>-05</sup> | 0.04 | N/A                     | N/A  | N/A | ≤1.79×10 <sup>-03</sup> | N/A                     | N/A      |
| Propylene Glycol | 9.19×10 <sup>-01</sup>  | 0.11 | 1.75×10 <sup>-01</sup>  | 1.29 | c   | 8.71×10 <sup>+00</sup>  | 1.36×10 <sup>-01</sup>  | 6321.99  |
| Propylene Oxide  | ≤1.56×10 <sup>-06</sup> | 0.05 | 1.48×10 <sup>-04</sup>  | 1.32 | e   | ≤2.96×10 <sup>-05</sup> | 1.12×10 <sup>-04</sup>  | ↓ ≥73.64 |
| Toluene          | ≤6.12×10 <sup>-06</sup> | 0.05 | 2.59×10 <sup>-03</sup>  | 1.32 | e   | ≤1.16×10 <sup>-04</sup> | 1.96×10 <sup>-03</sup>  | ↓ ≥94.10 |
| Water            | 4.57×10 <sup>-01</sup>  | 0.11 | 3.65×10 <sup>+01</sup>  | 1.32 | e   | 4.33×10 <sup>+00</sup>  | 2.77×10 <sup>+01</sup>  | ↓ 84.34  |

Average % Difference, Excluding Glycerol, PG and Water. a: Jaccard et al. 2019 b: Moldoveanu et al. 2017 c: Helen et al. 2018 d: Uchiyama et al. 2018 e: Schaller et al. 2016 f: Pappas et al. 2014 g: Roemer et al. 2012 h: IQOS PMTA, 2019.

**Table S10.** Comparison of HPHC and Chemical Intense Aerosol Levels in 10enthol 5.0% and Smoke Levels 3R4F Reference Cigarette.

| HPHC Chemical      | JUUL Menthol 5.0% (mg/puff) |             | 3R4F (mg/cig)          |             |                | Chemical and HPHC Normalized by Nicotine (mg/mg) |                        | % Difference vs_3R4F |
|--------------------|-----------------------------|-------------|------------------------|-------------|----------------|--------------------------------------------------|------------------------|----------------------|
|                    | HPHC Chemical               | or Nicotine | HPHC Chemical          | or Nicotine | Source Journal | JUUL Virginia Tobacco 3.0%                       | 3R4F                   |                      |
| 1-Aminonaphthalene | ≤8.19×10 <sup>-10</sup>     | 0.04        | 2.91×10 <sup>-05</sup> | 1.99        | a              | ≤2.25×10 <sup>-08</sup>                          | 1.46×10 <sup>-05</sup> | ↓ ≥99.85             |
| 1-Butanol          | ≤3.00×10 <sup>-05</sup>     | 0.07        | N/A                    | N/A         | N/A            | ≤4.33×10 <sup>-04</sup>                          | N/A                    | N/A                  |
| 1,3-Butadiene      | ≤2.85×10 <sup>-06</sup>     | 0.04        | 1.00×10 <sup>-01</sup> | 1.99        | a              | ≤7.85×10 <sup>-05</sup>                          | 5.03×10 <sup>-02</sup> | ↓ ≥99.84             |
| 2-Aminonaphthalene | ≤3.56×10 <sup>-10</sup>     | 0.04        | 1.81×10 <sup>-05</sup> | 1.99        | a              | ≤9.80×10 <sup>-09</sup>                          | 9.10×10 <sup>-06</sup> | ↓ ≥99.89             |
| 4-Aminobiphenyl    | ≤1.43×10 <sup>-10</sup>     | 0.04        | 3.91×10 <sup>-06</sup> | 1.99        | a              | ≤3.94×10 <sup>-09</sup>                          | 1.96×10 <sup>-06</sup> | ↓ ≥99.80             |

|                    |                             |      |                             |      |     |                             |                             |          |
|--------------------|-----------------------------|------|-----------------------------|------|-----|-----------------------------|-----------------------------|----------|
| Acetaldehyde       | $3.57 \times 10^{-05}$      | 0.16 | $1.84 \times 10^{+00}$      | 1.99 | a   | $2.30 \times 10^{-04}$      | $9.24 \times 10^{-01}$      | ↓ 99.98  |
| Acetyl Propionyl   | $\leq 1.76 \times 10^{-06}$ | 0.07 | $9.19 \times 10^{-02}$      | 1.99 | b   | $\leq 2.54 \times 10^{-05}$ | $4.62 \times 10^{-02}$      | ↓ ≥99.95 |
| Acrolein           | $\leq 2.01 \times 10^{-05}$ | 0.16 | $1.80 \times 10^{-01}$      | 1.99 | a   | $\leq 1.29 \times 10^{-04}$ | $9.05 \times 10^{-02}$      | ↓ ≥99.86 |
| Acrylonitrile      | $\leq 3.20 \times 10^{-06}$ | 0.07 | $2.05 \times 10^{-02}$      | 1.99 | a   | $\leq 4.63 \times 10^{-05}$ | $1.03 \times 10^{-02}$      | ↓ ≥99.55 |
| Ammonia            | NDFB                        | 0.04 | $3.40 \times 10^{-02}$      | 1.99 | a   | NDFB                        | $1.71 \times 10^{-02}$      | NC       |
| Anabasine          | $\leq 1.24 \times 10^{-05}$ | 0.04 | N/A                         | N/A  | N/A | $\leq 3.43 \times 10^{-04}$ | N/A                         | N/A      |
| Anatabine          | $\leq 1.03 \times 10^{-05}$ | 0.04 | N/A                         | N/A  | N/A | $\leq 2.84 \times 10^{-04}$ | N/A                         | N/A      |
| Benzene            | $\leq 1.71 \times 10^{-06}$ | 0.07 | $8.88 \times 10^{-02}$      | 1.99 | a   | $\leq 2.46 \times 10^{-05}$ | $4.46 \times 10^{-02}$      | ↓ ≥99.94 |
| Benzo(a)pyrene     | $\leq 5.31 \times 10^{-09}$ | 0.04 | $1.51 \times 10^{-05}$      | 1.99 | a   | $\leq 1.46 \times 10^{-07}$ | $7.59 \times 10^{-06}$      | ↓ ≥98.07 |
| Benzoic Acid       | $1.17 \times 10^{-01}$      | 0.16 | N/A                         | N/A  | N/A | $7.48 \times 10^{-01}$      | N/A                         | N/A      |
| Benzyl Acetate     | $\leq 3.00 \times 10^{-05}$ | 0.07 | N/A                         | N/A  | N/A | $\leq 4.33 \times 10^{-04}$ | N/A                         | N/A      |
| β-Nicotyrine       | $1.33 \times 10^{-05}$      | 0.16 | N/A                         | N/A  | N/A | $8.49 \times 10^{-05}$      | N/A                         | N/A      |
| Cadmium            | $\leq 5.25 \times 10^{-09}$ | 0.07 | $9.32 \times 10^{-05}$      | 1.99 | a   | $\leq 7.59 \times 10^{-08}$ | $4.68 \times 10^{-05}$      | ↓ ≥99.84 |
| Carbon Monoxide    | $\leq 5.25 \times 10^{-03}$ | 0.04 | $3.05 \times 10^{+01}$      | 1.99 | a   | $\leq 1.44 \times 10^{-01}$ | $1.53 \times 10^{+01}$      | ↓ ≥99.06 |
| Chromium           | NDFB                        | 0.07 | $\leq 1.19 \times 10^{-05}$ | 1.74 | c   | NDFB                        | $\leq 6.84 \times 10^{-06}$ | NC       |
| Copper             | $\leq 6.56 \times 10^{-08}$ | 0.07 | N/A                         | N/A  | N/A | $\leq 9.48 \times 10^{-07}$ | N/A                         | N/A      |
| Cotinine           | $\leq 4.06 \times 10^{-06}$ | 0.07 | N/A                         | N/A  | N/A | $\leq 5.87 \times 10^{-05}$ | N/A                         | N/A      |
| Crotonaldehyde     | $\leq 3.11 \times 10^{-06}$ | 0.07 | $5.95 \times 10^{-02}$      | 1.99 | a   | $\leq 4.50 \times 10^{-05}$ | $2.99 \times 10^{-02}$      | ↓ ≥99.85 |
| Diacetyl           | $\leq 8.70 \times 10^{-07}$ | 0.07 | $3.37 \times 10^{-01}$      | 1.99 | a   | $\leq 1.26 \times 10^{-05}$ | $1.69 \times 10^{-01}$      | ↓ ≥99.99 |
| Diethylene Glycol  | $\leq 1.20 \times 10^{-04}$ | 0.07 | N/A                         | N/A  | N/A | $\leq 1.73 \times 10^{-03}$ | N/A                         | N/A      |
| Ethyl Acetate      | $\leq 1.30 \times 10^{-04}$ | 0.16 | N/A                         | N/A  | N/A | $\leq 8.32 \times 10^{-04}$ | N/A                         | N/A      |
| Ethyl Acetoacetate | $\leq 2.40 \times 10^{-06}$ | 0.07 | N/A                         | N/A  | N/A | $\leq 3.47 \times 10^{-05}$ | N/A                         | N/A      |
| Ethylene Glycol    | $\leq 1.09 \times 10^{-04}$ | 0.16 | N/A                         | N/A  | N/A | $\leq 7.05 \times 10^{-04}$ | N/A                         | N/A      |
| Formaldehyde       | $7.56 \times 10^{-05}$      | 0.16 | $8.71 \times 10^{-02}$      | 1.99 | a   | $4.88 \times 10^{-04}$      | $4.38 \times 10^{-02}$      | ↓ 98.89  |
| Furfural           | $\leq 4.20 \times 10^{-05}$ | 0.07 | $2.59 \times 10^{-02}$      | 1.74 | c   | $\leq 6.07 \times 10^{-04}$ | $1.49 \times 10^{-02}$      | ↓ ≥95.92 |
| Glycerol           | $1.99 \times 10^{+00}$      | 0.16 | $2.70 \times 10^{+00}$      | 1.99 | a   | $1.29 \times 10^{+01}$      | $1.36 \times 10^{+00}$      | 847.29   |
| Glycidol           | NR                          | 0.07 | $1.76 \times 10^{-03}$      | 1.99 | a   | NR                          | $8.84 \times 10^{-04}$      | N/A      |
| Gold               | $\leq 6.33 \times 10^{-09}$ | 0.04 | N/A                         | N/A  | N/A | $\leq 1.74 \times 10^{-07}$ | N/A                         | N/A      |
| Isoamyl Acetate    | $\leq 4.80 \times 10^{-05}$ | 0.07 | N/A                         | N/A  | N/A | $\leq 6.94 \times 10^{-04}$ | N/A                         | N/A      |
| Isobutyl Acetate   | $\leq 3.00 \times 10^{-05}$ | 0.07 | N/A                         | N/A  | N/A | $\leq 4.33 \times 10^{-04}$ | N/A                         | N/A      |
| Isobutyraldehyde   | $\leq 3.58 \times 10^{-06}$ | 0.07 | N/A                         | N/A  | N/A | $\leq 5.17 \times 10^{-05}$ | N/A                         | N/A      |
| Isoprene           | $\leq 4.06 \times 10^{-06}$ | 0.04 | $7.99 \times 10^{-01}$      | 1.99 | a   | $\leq 1.12 \times 10^{-04}$ | $4.02 \times 10^{-01}$      | ↓ ≥99.97 |
| Lead               | $\leq 4.55 \times 10^{-08}$ | 0.07 | $3.12 \times 10^{-05}$      | 1.74 | c   | $\leq 6.57 \times 10^{-07}$ | $1.79 \times 10^{-05}$      | ↓ ≥96.33 |
| Menthol            | $2.90 \times 10^{-02}$      | 0.16 | $\leq 1.00 \times 10^{-05}$ | 2.10 | d   | $1.87 \times 10^{-01}$      | $\leq 4.76 \times 10^{-06}$ | NC       |
| Methyl Acetate     | $\leq 3.60 \times 10^{-05}$ | 0.07 | N/A                         | N/A  | N/A | $\leq 5.20 \times 10^{-04}$ | N/A                         | N/A      |
| Myosmine           | $\leq 1.93 \times 10^{-05}$ | 0.04 | N/A                         | N/A  | N/A | $\leq 5.30 \times 10^{-04}$ | N/A                         | N/A      |
| n-Butyraldehyde    | $\leq 1.76 \times 10^{-06}$ | 0.07 | $9.30 \times 10^{-02}$      | 1.99 | a   | $\leq 2.54 \times 10^{-05}$ | $4.67 \times 10^{-02}$      | ↓ ≥99.95 |
| Nickel             | $\leq 4.55 \times 10^{-07}$ | 0.07 | $\leq 1.29 \times 10^{-05}$ | 1.74 | c   | $\leq 6.57 \times 10^{-06}$ | $\leq 7.41 \times 10^{-06}$ | NC       |
| Nicotine           | $1.56 \times 10^{-01}$      | 0.16 | $1.99 \times 10^{+00}$      | 1.99 | a   | $1.00 \times 10^{+00}$      | $1.00 \times 10^{+00}$      | N/A      |

|                  |                            |      |                       |      |     |                            |                       |                 |
|------------------|----------------------------|------|-----------------------|------|-----|----------------------------|-----------------------|-----------------|
| Nicotine-N-Oxide | $\leq 8.72 \times 10^{-6}$ | 0.07 | N/A                   | N/A  | N/A | $\leq 1.26 \times 10^{-4}$ | N/A                   | N/A             |
| NNK              | $\leq 7.53 \times 10^{-9}$ | 0.07 | $2.95 \times 10^{-4}$ | 1.99 | a   | $\leq 1.09 \times 10^{-7}$ | $1.48 \times 10^{-4}$ | ↓ $\geq 99.93$  |
| NNN              | $\leq 4.92 \times 10^{-9}$ | 0.07 | $3.37 \times 10^{-4}$ | 1.99 | a   | $\leq 7.11 \times 10^{-8}$ | $1.69 \times 10^{-4}$ | ↓ $\geq 99.96$  |
| Normicotine      | $1.99 \times 10^{-5}$      | 0.04 | N/A                   | N/A  | N/A | $5.48 \times 10^{-4}$      | N/A                   | N/A             |
| Propionic Acid   | $\leq 7.80 \times 10^{-5}$ | 0.07 | N/A                   | N/A  | N/A | $\leq 1.13 \times 10^{-3}$ | N/A                   | N/A             |
| Propylene Glycol | $7.83 \times 10^{-1}$      | 0.16 | $2.37 \times 10^{-2}$ | 1.74 | c   | $5.05 \times 10^{+0}$      | $1.36 \times 10^{-2}$ | 37003.23        |
| Propylene Oxide  | $\leq 1.56 \times 10^{-6}$ | 0.07 | $1.00 \times 10^{+0}$ | 1.99 | a   | $\leq 2.26 \times 10^{-5}$ | $5.03 \times 10^{-1}$ | ↓ $\geq 99.996$ |
| Toluene          | $\leq 6.12 \times 10^{-6}$ | 0.07 | $1.53 \times 10^{-1}$ | 1.99 | a   | $\leq 8.84 \times 10^{-5}$ | $7.69 \times 10^{-2}$ | ↓ $\geq 99.89$  |
| Water            | $3.84 \times 10^{-1}$      | 0.16 | $1.58 \times 10^{+1}$ | 1.89 | e   | $2.47 \times 10^{+0}$      | $8.36 \times 10^{+0}$ | ↓ 70.40         |

Average % Difference, Excluding Glycerol, PG and Water. a: Jaccard et al. 2019 b: Moldoveanu et al. 2017 c: Helen et al. 2018 d: Uchiyama et al. 2018 e: Schaller et al. 2016 f: Pappas et al. 2014 g: Roemer et al. 2012 h: IQOS PMTA, 2019.

**Table S11.** Comparison of HPHC and Chemical Non-Intense Aerosol Levels in Menthol 5.0% and Smoke Levels in 3R4F Reference Cigarette.

| HPHC Chemical      | JUUL Menthol 5.0% (mg/puff) |             | 3R4F (mg/cig)              |             |                | Chemical and HPHC Normalized by Nicotine (mg/mg) |                            | % Difference vs_3R4F |
|--------------------|-----------------------------|-------------|----------------------------|-------------|----------------|--------------------------------------------------|----------------------------|----------------------|
|                    | HPHC Chemical               | or Nicotine | HPHC Chemical              | or Nicotine | Source Journal | JUUL Virginia Tobacco 3.0%                       | 3R4F                       |                      |
| 1-Aminonaphthalene | $\leq 8.19 \times 10^{-10}$ | 0.04        | $1.42 \times 10^{-5}$      | 0.70        | a              | $\leq 2.25 \times 10^{-8}$                       | $2.02 \times 10^{-5}$      | ↓ $\geq 99.89$       |
| 1-Butanol          | $\leq 3.00 \times 10^{-5}$  | 0.04        | N/A                        | N/A         | N/A            | $\leq 7.45 \times 10^{-4}$                       | N/A                        | N/A                  |
| 1,3-Butadiene      | $\leq 2.85 \times 10^{-6}$  | 0.04        | $3.79 \times 10^{-2}$      | 0.70        | a              | $\leq 7.85 \times 10^{-5}$                       | $5.40 \times 10^{-2}$      | ↓ $\geq 99.85$       |
| 2-Aminonaphthalene | $\leq 3.56 \times 10^{-10}$ | 0.04        | $8.77 \times 10^{-6}$      | 0.70        | a              | $\leq 9.80 \times 10^{-9}$                       | $1.25 \times 10^{-5}$      | ↓ $\geq 99.92$       |
| 4-Aminobiphenyl    | $\leq 1.43 \times 10^{-10}$ | 0.04        | $1.54 \times 10^{-6}$      | 0.70        | a              | $\leq 3.94 \times 10^{-9}$                       | $2.19 \times 10^{-6}$      | ↓ $\geq 99.82$       |
| Acetaldehyde       | $\leq 2.16 \times 10^{-5}$  | 0.04        | $5.97 \times 10^{-1}$      | 0.70        | a              | $\leq 5.35 \times 10^{-4}$                       | $8.50 \times 10^{-1}$      | ↓ $\geq 99.94$       |
| Acetyl Propionyl   | $\leq 1.76 \times 10^{-6}$  | 0.04        | $2.95 \times 10^{-2}$      | 0.70        | b              | $\leq 4.36 \times 10^{-5}$                       | $4.21 \times 10^{-2}$      | ↓ $\geq 99.90$       |
| Acrolein           | $\leq 2.01 \times 10^{-5}$  | 0.08        | $5.32 \times 10^{-2}$      | 0.70        | a              | $\leq 2.44 \times 10^{-4}$                       | $7.58 \times 10^{-2}$      | ↓ $\geq 99.68$       |
| Acrylonitrile      | $\leq 3.20 \times 10^{-6}$  | 0.04        | $5.23 \times 10^{-3}$      | 0.70        | a              | $\leq 7.95 \times 10^{-5}$                       | $7.45 \times 10^{-3}$      | ↓ $\geq 98.93$       |
| Ammonia            | NDFB                        | 0.04        | $9.64 \times 10^{-3}$      | 0.70        | a              | NDFB                                             | $1.37 \times 10^{-2}$      | NC                   |
| Anabasine          | $\leq 1.24 \times 10^{-5}$  | 0.04        | N/A                        | N/A         | N/A            | $\leq 3.43 \times 10^{-4}$                       | N/A                        | N/A                  |
| Anatabine          | $\leq 1.03 \times 10^{-5}$  | 0.04        | N/A                        | N/A         | N/A            | $\leq 2.84 \times 10^{-4}$                       | N/A                        | N/A                  |
| Benzene            | $\leq 1.71 \times 10^{-6}$  | 0.04        | $3.36 \times 10^{-2}$      | 0.70        | a              | $\leq 4.24 \times 10^{-5}$                       | $4.79 \times 10^{-2}$      | ↓ $\geq 99.91$       |
| Benzo(a)pyrene     | $\leq 5.31 \times 10^{-9}$  | 0.04        | $6.30 \times 10^{-6}$      | 0.70        | a              | $\leq 1.46 \times 10^{-7}$                       | $8.97 \times 10^{-6}$      | ↓ $\geq 98.37$       |
| Benzoic Acid       | $7.30 \times 10^{-2}$       | 0.09        | N/A                        | N/A         | N/A            | $8.17 \times 10^{-1}$                            | N/A                        | N/A                  |
| Benzyl Acetate     | $\leq 3.00 \times 10^{-5}$  | 0.04        | N/A                        | N/A         | N/A            | $\leq 7.45 \times 10^{-4}$                       | N/A                        | N/A                  |
| β-Nicotyrine       | $\leq 8.25 \times 10^{-6}$  | 0.09        | N/A                        | N/A         | N/A            | $\leq 9.24 \times 10^{-5}$                       | N/A                        | N/A                  |
| Cadmium            | $\leq 5.25 \times 10^{-9}$  | 0.04        | $2.45 \times 10^{-5}$      | 0.70        | a              | $\leq 1.30 \times 10^{-7}$                       | $3.49 \times 10^{-5}$      | ↓ $\geq 99.63$       |
| Carbon Monoxide    | $\leq 5.25 \times 10^{-3}$  | 0.04        | $1.00 \times 10^{+1}$      | 0.70        | a              | $\leq 1.44 \times 10^{-1}$                       | $1.42 \times 10^{+1}$      | ↓ $\geq 98.99$       |
| Chromium           | NDFB                        | 0.04        | $\leq 8.80 \times 10^{-7}$ | 0.70        | f              | NDFB                                             | $\leq 1.25 \times 10^{-6}$ | NC                   |

|                    |                             |      |                             |      |     |                             |                             |           |
|--------------------|-----------------------------|------|-----------------------------|------|-----|-----------------------------|-----------------------------|-----------|
| Copper             | $\leq 6.56 \times 10^{-08}$ | 0.04 | N/A                         | N/A  | N/A | $\leq 1.63 \times 10^{-06}$ | N/A                         | N/A       |
| Cotinine           | $\leq 4.06 \times 10^{-06}$ | 0.04 | N/A                         | N/A  | N/A | $\leq 1.01 \times 10^{-04}$ | N/A                         | N/A       |
| Crotonaldehyde     | $\leq 3.11 \times 10^{-06}$ | 0.04 | $9.89 \times 10^{-03}$      | 0.70 | a   | $\leq 7.73 \times 10^{-05}$ | $1.41 \times 10^{-02}$      | ↓ ≥99.45  |
| Diacetyl           | $\leq 8.70 \times 10^{-07}$ | 0.04 | $1.15 \times 10^{-01}$      | 0.70 | b   | $\leq 2.16 \times 10^{-05}$ | $1.64 \times 10^{-01}$      | ↓ ≥99.99  |
| Diethylene Glycol  | $\leq 1.20 \times 10^{-04}$ | 0.04 | N/A                         | N/A  | N/A | $\leq 2.98 \times 10^{-03}$ | N/A                         | N/A       |
| Ethyl Acetate      | $\leq 3.00 \times 10^{-05}$ | 0.04 | N/A                         | N/A  | N/A | $\leq 7.45 \times 10^{-04}$ | N/A                         | N/A       |
| Ethyl Acetoacetate | $\leq 2.40 \times 10^{-06}$ | 0.04 | N/A                         | N/A  | N/A | $\leq 5.96 \times 10^{-05}$ | N/A                         | N/A       |
| Ethylene Glycol    | $\leq 1.09 \times 10^{-04}$ | 0.04 | N/A                         | N/A  | N/A | $\leq 2.71 \times 10^{-03}$ | N/A                         | N/A       |
| Formaldehyde       | $3.94 \times 10^{-05}$      | 0.09 | $2.47 \times 10^{-02}$      | 0.70 | a   | $4.41 \times 10^{-04}$      | $3.52 \times 10^{-02}$      | ↓ 98.75   |
| Furfural           | $\leq 4.20 \times 10^{-05}$ | 0.04 | $1.40 \times 10^{-02}$      | 0.76 | d   | $\leq 1.04 \times 10^{-03}$ | $1.84 \times 10^{-02}$      | ↓ ≥94.34  |
| Glycerol           | $1.23 \times 10^{+00}$      | 0.09 | $2.70 \times 10^{+00}$      | 0.70 | a   | $1.38 \times 10^{+01}$      | $3.85 \times 10^{+00}$      | 258.69    |
| Glycidol           | NR                          | 0.04 | N/A                         | N/A  | N/A | NR                          | N/A                         | N/A       |
| Gold               | $\leq 6.33 \times 10^{-09}$ | 0.04 | N/A                         | N/A  | N/A | $\leq 1.74 \times 10^{-07}$ | N/A                         | N/A       |
| Isoamyl Acetate    | $\leq 4.80 \times 10^{-05}$ | 0.04 | N/A                         | N/A  | N/A | $\leq 1.19 \times 10^{-03}$ | N/A                         | N/A       |
| Isobutyl Acetate   | $\leq 3.00 \times 10^{-05}$ | 0.04 | N/A                         | N/A  | N/A | $\leq 7.45 \times 10^{-04}$ | N/A                         | N/A       |
| Isobutyraldehyde   | $\leq 8.26 \times 10^{-07}$ | 0.04 | N/A                         | N/A  | N/A | $\leq 2.05 \times 10^{-05}$ | N/A                         | N/A       |
| Isoprene           | $\leq 4.06 \times 10^{-06}$ | 0.04 | $2.88 \times 10^{-01}$      | 0.70 | a   | $\leq 1.12 \times 10^{-04}$ | $4.10 \times 10^{-01}$      | ↓ ≥99.97  |
| Lead               | $\leq 4.55 \times 10^{-08}$ | 0.08 | $9.20 \times 10^{-06}$      | 0.70 | f   | $\leq 5.52 \times 10^{-07}$ | $1.31 \times 10^{-05}$      | ↓ ≥95.79  |
| Menthol            | $1.81 \times 10^{-02}$      | 0.09 | $\leq 1.00 \times 10^{-05}$ | 0.76 | a   | $2.02 \times 10^{-01}$      | $\leq 1.32 \times 10^{-05}$ | NC        |
| Methyl Acetate     | $\leq 3.60 \times 10^{-05}$ | 0.04 | N/A                         | N/A  | N/A | $\leq 8.94 \times 10^{-04}$ | N/A                         | N/A       |
| Myosmine           | $\leq 1.93 \times 10^{-05}$ | 0.04 | N/A                         | N/A  | N/A | $\leq 5.30 \times 10^{-04}$ | N/A                         | N/A       |
| n-Butyraldehyde    | $\leq 1.76 \times 10^{-06}$ | 0.04 | $2.84 \times 10^{-02}$      | 0.70 | a   | $\leq 4.36 \times 10^{-05}$ | $4.05 \times 10^{-02}$      | ↓ ≥99.89  |
| Nickel             | $\leq 4.55 \times 10^{-07}$ | 0.04 | $\leq 3.80 \times 10^{-07}$ | 0.70 | f   | $\leq 1.13 \times 10^{-05}$ | $\leq 5.41 \times 10^{-07}$ | NC        |
| Nicotine           | $8.93 \times 10^{-02}$      | 0.09 | $7.02 \times 10^{-01}$      | 0.70 | a   | $1.00 \times 10^{+00}$      | $1.00 \times 10^{+00}$      | N/A       |
| Nicotine-N-Oxide   | $\leq 8.72 \times 10^{-06}$ | 0.04 | N/A                         | N/A  | N/A | $\leq 2.16 \times 10^{-04}$ | N/A                         | N/A       |
| NNK                | $\leq 7.53 \times 10^{-09}$ | 0.04 | $1.13 \times 10^{-04}$      | 0.70 | a   | $\leq 1.87 \times 10^{-07}$ | $1.61 \times 10^{-04}$      | ↓ ≥99.88  |
| NNN                | $\leq 4.92 \times 10^{-09}$ | 0.04 | $1.31 \times 10^{-04}$      | 0.70 | a   | $\leq 1.22 \times 10^{-07}$ | $1.87 \times 10^{-04}$      | ↓ ≥99.93  |
| Normicotine        | $1.99 \times 10^{-05}$      | 0.04 | N/A                         | N/A  | N/A | $5.48 \times 10^{-04}$      | N/A                         | N/A       |
| Propionic Acid     | $\leq 7.80 \times 10^{-05}$ | 0.04 | N/A                         | N/A  | N/A | $\leq 1.94 \times 10^{-03}$ | N/A                         | N/A       |
| Propylene Glycol   | $4.24 \times 10^{-01}$      | 0.08 | $3.20 \times 10^{-03}$      | 0.76 | d   | $5.14 \times 10^{+00}$      | $4.21 \times 10^{-03}$      | 122083.26 |
| Propylene Oxide    | $\leq 1.56 \times 10^{-06}$ | 0.04 | $2.97 \times 10^{-01}$      | 0.70 | a   | $\leq 3.87 \times 10^{-05}$ | $4.23 \times 10^{-01}$      | ↓ ≥99.99  |
| Toluene            | $\leq 6.12 \times 10^{-06}$ | 0.04 | $5.14 \times 10^{-02}$      | 0.70 | a   | $\leq 1.52 \times 10^{-04}$ | $7.32 \times 10^{-02}$      | ↓ ≥99.79  |
| Water              | $2.52 \times 10^{-01}$      | 0.09 | $3.20 \times 10^{+00}$      | 0.76 | d   | $2.82 \times 10^{+00}$      | $4.21 \times 10^{+00}$      | ↓ 33.00   |

Average % Difference, Excluding Glycerol, PG and Water. a: Jaccard et al. 2019 b: Moldoveanu et al. 2017 c: Helen et al. 2018 d: Uchiyama et al. 2018 e: Schaller et al. 2016 f: Pappas et al. 2014 g: Roemer et al. 2012 h: IQOS PMTA, 2019.

**Table S12.** Comparison of HPHC and Chemical Intense Aerosol Levels in Menthol 5.0% and Aerosol in IQOS Menthol.

| HPHC Chemical      | JUUL Menthol 5.0% (mg/puff) |             | IQOS Menthol (mg/cig)       |             |                | Chemical and HPHC Normalized by Nicotine (mg/mg) |                             | % Difference vs_3R4F |
|--------------------|-----------------------------|-------------|-----------------------------|-------------|----------------|--------------------------------------------------|-----------------------------|----------------------|
|                    | HPHC Chemical               | or Nicotine | HPHC Chemical               | or Nicotine | Source Journal | JUUL Virginia Tobacco 3.0%                       | 3R4F                        |                      |
| 1-Aminonaphthalene | $\leq 8.19 \times 10^{-10}$ | 0.04        | $8.60 \times 10^{-08}$      | 1.21        | e              | $\leq 2.25 \times 10^{-08}$                      | $7.11 \times 10^{-08}$      | ↓ ≥68.30             |
| 1-Butanol          | $\leq 3.00 \times 10^{-05}$ | 0.07        | N/A                         | N/A         | N/A            | $\leq 4.33 \times 10^{-04}$                      | N/A                         | N/A                  |
| 1,3-Butadiene      | $\leq 2.85 \times 10^{-06}$ | 0.04        | $2.65 \times 10^{-04}$      | 1.21        | e              | $\leq 7.85 \times 10^{-05}$                      | $2.19 \times 10^{-04}$      | ↓ ≥64.17             |
| 2-Aminonaphthalene | $\leq 3.56 \times 10^{-10}$ | 0.04        | $\leq 3.50 \times 10^{-08}$ | 1.21        | e              | $\leq 9.80 \times 10^{-09}$                      | $\leq 2.89 \times 10^{-08}$ | NC                   |
| 4-Aminobiphenyl    | $\leq 1.43 \times 10^{-10}$ | 0.04        | $\leq 5.10 \times 10^{-08}$ | 1.21        | e              | $\leq 3.94 \times 10^{-09}$                      | $\leq 4.21 \times 10^{-08}$ | NC                   |
| Acetaldehyde       | $3.57 \times 10^{-05}$      | 0.16        | $2.05 \times 10^{-01}$      | 1.21        | e              | $2.30 \times 10^{-04}$                           | $1.69 \times 10^{-01}$      | ↓ 99.86              |
| Acetyl Propionyl   | $\leq 1.76 \times 10^{-06}$ | 0.07        | N/A                         | N/A         | N/A            | $\leq 2.54 \times 10^{-05}$                      | N/A                         | N/A                  |
| Acrolein           | $\leq 2.01 \times 10^{-05}$ | 0.16        | $9.15 \times 10^{-03}$      | 1.21        | e              | $\leq 1.29 \times 10^{-04}$                      | $7.56 \times 10^{-03}$      | ↓ ≥98.30             |
| Acrylonitrile      | $\leq 3.20 \times 10^{-06}$ | 0.07        | $2.20 \times 10^{-04}$      | 1.21        | e              | $\leq 4.63 \times 10^{-05}$                      | $1.82 \times 10^{-04}$      | ↓ ≥74.56             |
| Ammonia            | NDFB                        | 0.04        | $1.38 \times 10^{-02}$      | 1.21        | e              | NDFB                                             | $1.14 \times 10^{-02}$      | NC                   |
| Anabasine          | $\leq 1.24 \times 10^{-05}$ | 0.04        | N/A                         | N/A         | N/A            | $\leq 3.43 \times 10^{-04}$                      | N/A                         | N/A                  |
| Anatabine          | $\leq 1.03 \times 10^{-05}$ | 0.04        | N/A                         | N/A         | N/A            | $\leq 2.84 \times 10^{-04}$                      | N/A                         | N/A                  |
| Benzene            | $\leq 1.71 \times 10^{-06}$ | 0.07        | $6.40 \times 10^{-04}$      | 1.21        | e              | $\leq 2.46 \times 10^{-05}$                      | $5.29 \times 10^{-04}$      | ↓ ≥95.34             |
| Benzo(a)pyrene     | $\leq 5.31 \times 10^{-09}$ | 0.04        | $1.29 \times 10^{-06}$      | 1.21        | e              | $\leq 1.46 \times 10^{-07}$                      | $1.07 \times 10^{-06}$      | ↓ ≥86.29             |
| Benzoic Acid       | $1.17 \times 10^{-01}$      | 0.16        | N/A                         | N/A         | N/A            | $7.48 \times 10^{-01}$                           | N/A                         | N/A                  |
| Benzyl Acetate     | $\leq 3.00 \times 10^{-05}$ | 0.07        | N/A                         | N/A         | N/A            | $\leq 4.33 \times 10^{-04}$                      | N/A                         | N/A                  |
| β-Nicotyrine       | $1.33 \times 10^{-05}$      | 0.16        | N/A                         | N/A         | N/A            | $8.49 \times 10^{-05}$                           | N/A                         | N/A                  |
| Cadmium            | $\leq 5.25 \times 10^{-09}$ | 0.07        | $\leq 3.50 \times 10^{-07}$ | 1.21        | e              | $\leq 7.59 \times 10^{-08}$                      | $\leq 2.89 \times 10^{-07}$ | NC                   |
| Carbon Monoxide    | $\leq 5.25 \times 10^{-03}$ | 0.04        | $5.94 \times 10^{-01}$      | 1.21        | e              | $\leq 1.44 \times 10^{-01}$                      | $4.91 \times 10^{-01}$      | ↓ ≥70.57             |
| Chromium           | NDFB                        | 0.07        | $\leq 5.50 \times 10^{-07}$ | 1.21        | e              | NDFB                                             | $\leq 4.55 \times 10^{-07}$ | NC                   |
| Copper             | $\leq 6.56 \times 10^{-08}$ | 0.07        | N/A                         | N/A         | N/A            | $\leq 9.48 \times 10^{-07}$                      | N/A                         | N/A                  |
| Cotinine           | $\leq 4.06 \times 10^{-06}$ | 0.07        | N/A                         | N/A         | N/A            | $\leq 5.87 \times 10^{-05}$                      | N/A                         | N/A                  |
| Crotonaldehyde     | $\leq 3.11 \times 10^{-06}$ | 0.07        | $3.24 \times 10^{-03}$      | 1.21        | e              | $\leq 4.50 \times 10^{-05}$                      | $2.68 \times 10^{-03}$      | ↓ ≥98.32             |
| Diacetyl           | $\leq 8.70 \times 10^{-07}$ | 0.07        | $6.50 \times 10^{-02}$      | 1.20        | d              | $\leq 1.26 \times 10^{-05}$                      | $5.42 \times 10^{-02}$      | ↓ ≥99.98             |
| Diethylene Glycol  | $\leq 1.20 \times 10^{-04}$ | 0.07        | N/A                         | N/A         | N/A            | $\leq 1.73 \times 10^{-03}$                      | N/A                         | N/A                  |
| Ethyl Acetate      | $\leq 1.30 \times 10^{-04}$ | 0.16        | N/A                         | N/A         | N/A            | $\leq 8.32 \times 10^{-04}$                      | N/A                         | N/A                  |
| Ethyl Acetoacetate | $\leq 2.40 \times 10^{-06}$ | 0.07        | N/A                         | N/A         | N/A            | $\leq 3.47 \times 10^{-05}$                      | N/A                         | N/A                  |
| Ethylene Glycol    | $\leq 1.09 \times 10^{-04}$ | 0.16        | N/A                         | N/A         | N/A            | $\leq 7.05 \times 10^{-04}$                      | N/A                         | N/A                  |
| Formaldehyde       | $7.56 \times 10^{-05}$      | 0.16        | $4.55 \times 10^{-03}$      | 1.21        | e              | $4.88 \times 10^{-04}$                           | $3.76 \times 10^{-03}$      | ↓ 87.03              |
| Furfural           | $\leq 4.20 \times 10^{-05}$ | 0.07        | N/A                         | N/A         | N/A            | $\leq 6.07 \times 10^{-04}$                      | N/A                         | N/A                  |
| Glycerol           | $1.99 \times 10^{+00}$      | 0.16        | $3.94 \times 10^{+00}$      | N/A         | N/A            | $1.29 \times 10^{+01}$                           | $3.26 \times 10^{+00}$      | 294.71               |

|                  |                         |      |                         |      |     |                         |                         |          |
|------------------|-------------------------|------|-------------------------|------|-----|-------------------------|-------------------------|----------|
| Glycidol         | NR                      | 0.07 | 1.10×10 <sup>-03</sup>  | 1.19 | h   | NR                      | 9.24×10 <sup>-04</sup>  | N/A      |
| Gold             | ≤6.33×10 <sup>-09</sup> | 0.04 | N/A                     | N/A  | N/A | ≤1.74×10 <sup>-07</sup> | N/A                     | N/A      |
| Isoamyl Acetate  | ≤4.80×10 <sup>-05</sup> | 0.07 | N/A                     | N/A  | N/A | ≤6.94×10 <sup>-04</sup> | N/A                     | N/A      |
| Isobutyl Acetate | ≤3.00×10 <sup>-05</sup> | 0.07 | N/A                     | N/A  | N/A | ≤4.33×10 <sup>-04</sup> | N/A                     | N/A      |
| Isobutyraldehyde | ≤3.58×10 <sup>-06</sup> | 0.07 | N/A                     | N/A  | N/A | ≤5.17×10 <sup>-05</sup> | N/A                     | N/A      |
| Isoprene         | ≤4.06×10 <sup>-06</sup> | 0.04 | 2.11×10 <sup>-03</sup>  | 1.21 | e   | ≤1.12×10 <sup>-04</sup> | 1.74×10 <sup>-03</sup>  | ↓ ≥93.59 |
| Lead             | ≤4.55×10 <sup>-08</sup> | 0.07 | ≤3.35×10 <sup>-06</sup> | 1.21 | e   | ≤6.57×10 <sup>-07</sup> | ≤2.77×10 <sup>-06</sup> | NC       |
| Menthol          | 2.90×10 <sup>-02</sup>  | 0.16 | 2.62×10 <sup>+00</sup>  | 1.21 | e   | 1.87×10 <sup>-01</sup>  | 2.17×10 <sup>+00</sup>  | ↓ 91.37  |
| Methyl Acetate   | ≤3.60×10 <sup>-05</sup> | 0.07 | N/A                     | N/A  | N/A | ≤5.20×10 <sup>-04</sup> | N/A                     | N/A      |
| Myosmine         | ≤1.93×10 <sup>-05</sup> | 0.04 | N/A                     | N/A  | N/A | ≤5.30×10 <sup>-04</sup> | N/A                     | N/A      |
| n-Butyraldehyde  | ≤1.76×10 <sup>-06</sup> | 0.07 | 2.67×10 <sup>-02</sup>  | 1.21 | e   | ≤2.54×10 <sup>-05</sup> | 2.21×10 <sup>-02</sup>  | ↓ ≥99.89 |
| Nickel           | ≤4.55×10 <sup>-07</sup> | 0.07 | ≤5.50×10 <sup>-07</sup> | 1.21 | e   | ≤6.57×10 <sup>-06</sup> | ≤4.55×10 <sup>-07</sup> | NC       |
| Nicotine         | 1.56×10 <sup>-01</sup>  | 0.16 | 1.21×10 <sup>+00</sup>  | 1.21 | e   | 1.00×10 <sup>+00</sup>  | 1.00×10 <sup>+00</sup>  | N/A      |
| Nicotine-N-Oxide | ≤8.72×10 <sup>-06</sup> | 0.07 | N/A                     | N/A  | N/A | ≤1.26×10 <sup>-04</sup> | N/A                     | N/A      |
| NNK              | ≤7.53×10 <sup>-09</sup> | 0.07 | 5.90×10 <sup>-06</sup>  | N/A  | N/A | ≤1.09×10 <sup>-07</sup> | 4.88×10 <sup>-06</sup>  | ↓ ≥97.77 |
| NNN              | ≤4.92×10 <sup>-09</sup> | 0.07 | 1.37×10 <sup>-05</sup>  | 1.21 | e   | ≤7.11×10 <sup>-08</sup> | 1.13×10 <sup>-05</sup>  | ↓ ≥99.37 |
| Nornicotine      | 1.99×10 <sup>-05</sup>  | 0.04 | N/A                     | N/A  | N/A | 5.48×10 <sup>-04</sup>  | N/A                     | N/A      |
| Propionic Acid   | ≤7.80×10 <sup>-05</sup> | 0.07 | N/A                     | N/A  | N/A | ≤1.13×10 <sup>-03</sup> | N/A                     | N/A      |
| Propylene Glycol | 7.83×10 <sup>-01</sup>  | 0.16 | 3.90×10 <sup>-01</sup>  | 1.20 | d   | 5.05×10 <sup>+00</sup>  | 3.25×10 <sup>-01</sup>  | 1454.99  |
| Propylene Oxide  | ≤1.56×10 <sup>-06</sup> | 0.07 | 1.49×10 <sup>-04</sup>  | 1.21 | e   | ≤2.26×10 <sup>-05</sup> | 1.23×10 <sup>-04</sup>  | ↓ ≥81.69 |
| Toluene          | ≤6.12×10 <sup>-06</sup> | 0.07 | 2.39×10 <sup>-03</sup>  | 1.21 | e   | ≤8.84×10 <sup>-05</sup> | 1.98×10 <sup>-03</sup>  | ↓ ≥95.53 |
| Water            | 3.84×10 <sup>-01</sup>  | 0.16 | 2.97×10 <sup>+01</sup>  | 1.21 | e   | 2.47×10 <sup>+00</sup>  | 2.45×10 <sup>+01</sup>  | ↓ 89.92  |

Average % Difference, Excluding Glycerol, PG and Water. a: Jaccard et al. 2019 b: Moldoveanu et al. 2017 c: Helen et al. 2018 d: Uchiyama et al. 2018 e: Schaller et al. 2016 f: Pappas et al. 2014 g: Roemer et al. 2012 h: IQOS PMTA, 2019.

**Table S13.** Comparison of HPHC and Chemical Intense Aerosol Levels in Menthol 13.0% and Smoke Levels 3R4F Reference Cigarette.

| HPHC Chemical      | JUUL Menthol 3.0% (mg/puff) |             | 3R4F (mg/cig)          |             |                | Chemical and HPHC Normalized by Nicotine (mg/mg) |                        | % Difference vs_3R4F |
|--------------------|-----------------------------|-------------|------------------------|-------------|----------------|--------------------------------------------------|------------------------|----------------------|
|                    | HPHC Chemical               | or Nicotine | HPHC Chemical          | or Nicotine | Source Journal | JUUL Virginia Tobacco 3.0%                       | 3R4F                   |                      |
| 1-Aminonaphthalene | ≤3.31×10 <sup>-10</sup>     | 0.03        | 2.91×10 <sup>-05</sup> | 1.99        | a              | ≤9.66×10 <sup>-09</sup>                          | 1.46×10 <sup>-05</sup> | ↓ ≥99.93             |
| 1-Butanol          | ≤3.00×10 <sup>-05</sup>     | 0.05        | N/A                    | N/A         | N/A            | ≤6.58×10 <sup>-04</sup>                          | N/A                    | N/A                  |
| 1,3-Butadiene      | ≤1.61×10 <sup>-05</sup>     | 0.03        | 1.00×10 <sup>-01</sup> | 1.99        | a              | ≤4.69×10 <sup>-04</sup>                          | 5.03×10 <sup>-02</sup> | ↓ ≥99.07             |
| 2-Aminonaphthalene | ≤3.37×10 <sup>-10</sup>     | 0.03        | 1.81×10 <sup>-05</sup> | 1.99        | a              | ≤9.84×10 <sup>-09</sup>                          | 9.10×10 <sup>-06</sup> | ↓ ≥99.89             |
| 4-Aminobiphenyl    | ≤1.66×10 <sup>-10</sup>     | 0.03        | 3.91×10 <sup>-06</sup> | 1.99        | a              | ≤4.85×10 <sup>-09</sup>                          | 1.96×10 <sup>-06</sup> | ↓ ≥99.75             |

|                    |                             |      |                             |      |     |                             |                             |          |
|--------------------|-----------------------------|------|-----------------------------|------|-----|-----------------------------|-----------------------------|----------|
| Acetaldehyde       | $3.56 \times 10^{-05}$      | 0.11 | $1.84 \times 10^{+00}$      | 1.99 | a   | $3.31 \times 10^{-04}$      | $9.24 \times 10^{-01}$      | ↓ 99.96  |
| Acetyl Propionyl   | $\leq 1.76 \times 10^{-06}$ | 0.05 | $9.19 \times 10^{-02}$      | 1.99 | b   | $\leq 3.85 \times 10^{-05}$ | $4.62 \times 10^{-02}$      | ↓ ≥99.92 |
| Acrolein           | $\leq 2.01 \times 10^{-05}$ | 0.09 | $1.80 \times 10^{-01}$      | 1.99 | a   | $\leq 2.14 \times 10^{-04}$ | $9.05 \times 10^{-02}$      | ↓ ≥99.76 |
| Acrylonitrile      | $\leq 3.20 \times 10^{-06}$ | 0.05 | $2.05 \times 10^{-02}$      | 1.99 | a   | $\leq 7.02 \times 10^{-05}$ | $1.03 \times 10^{-02}$      | ↓ ≥99.32 |
| Ammonia            | $\leq 6.64 \times 10^{-05}$ | 0.03 | $3.40 \times 10^{-02}$      | 1.99 | a   | $\leq 1.94 \times 10^{-03}$ | $1.71 \times 10^{-02}$      | ↓ ≥88.65 |
| Anabasine          | $\leq 3.64 \times 10^{-06}$ | 0.03 | N/A                         | N/A  | N/A | $\leq 1.06 \times 10^{-04}$ | N/A                         | N/A      |
| Anatabine          | $\leq 3.30 \times 10^{-06}$ | 0.03 | N/A                         | N/A  | N/A | $\leq 9.62 \times 10^{-05}$ | N/A                         | N/A      |
| Benzene            | $\leq 1.71 \times 10^{-06}$ | 0.05 | $8.88 \times 10^{-02}$      | 1.99 | a   | $\leq 3.74 \times 10^{-05}$ | $4.46 \times 10^{-02}$      | ↓ ≥99.92 |
| Benzo(a)pyrene     | $\leq 9.31 \times 10^{-10}$ | 0.03 | $1.51 \times 10^{-05}$      | 1.99 | a   | $\leq 2.72 \times 10^{-08}$ | $7.59 \times 10^{-06}$      | ↓ ≥99.64 |
| Benzoic Acid       | $8.57 \times 10^{-02}$      | 0.11 | N/A                         | N/A  | N/A | $7.97 \times 10^{-01}$      | N/A                         | N/A      |
| Benzyl Acetate     | $\leq 3.00 \times 10^{-05}$ | 0.05 | N/A                         | N/A  | N/A | $\leq 6.58 \times 10^{-04}$ | N/A                         | N/A      |
| β-Nicotyrine       | $\leq 8.25 \times 10^{-06}$ | 0.09 | N/A                         | N/A  | N/A | $\leq 8.79 \times 10^{-05}$ | N/A                         | N/A      |
| Cadmium            | $\leq 5.25 \times 10^{-09}$ | 0.05 | $9.32 \times 10^{-05}$      | 1.99 | a   | $\leq 1.15 \times 10^{-07}$ | $4.68 \times 10^{-05}$      | ↓ ≥99.75 |
| Carbon Monoxide    | NT                          | 0.03 | $3.05 \times 10^{+01}$      | 1.99 | a   | NT                          | $1.53 \times 10^{+01}$      | N/A      |
| Chromium           | NDFB                        | 0.05 | $\leq 1.19 \times 10^{-05}$ | 1.74 | c   | NDFB                        | $\leq 6.84 \times 10^{-06}$ | NC       |
| Copper             | $\leq 2.84 \times 10^{-07}$ | 0.09 | N/A                         | N/A  | N/A | $\leq 3.03 \times 10^{-06}$ | N/A                         | N/A      |
| Cotinine           | $\leq 4.06 \times 10^{-06}$ | 0.05 | N/A                         | N/A  | N/A | $\leq 8.92 \times 10^{-05}$ | N/A                         | N/A      |
| Crotonaldehyde     | $\leq 3.11 \times 10^{-06}$ | 0.05 | $5.95 \times 10^{-02}$      | 1.99 | a   | $\leq 6.83 \times 10^{-05}$ | $2.99 \times 10^{-02}$      | ↓ ≥99.77 |
| Diacetyl           | $\leq 8.70 \times 10^{-07}$ | 0.05 | $3.37 \times 10^{-01}$      | 1.99 | a   | $\leq 1.91 \times 10^{-05}$ | $1.69 \times 10^{-01}$      | ↓ ≥99.99 |
| Diethylene Glycol  | $\leq 1.20 \times 10^{-04}$ | 0.05 | N/A                         | N/A  | N/A | $\leq 2.63 \times 10^{-03}$ | N/A                         | N/A      |
| Ethyl Acetate      | $\leq 1.30 \times 10^{-04}$ | 0.05 | N/A                         | N/A  | N/A | $\leq 2.85 \times 10^{-03}$ | N/A                         | N/A      |
| Ethyl Acetoacetate | $\leq 2.40 \times 10^{-06}$ | 0.05 | N/A                         | N/A  | N/A | $\leq 5.27 \times 10^{-05}$ | N/A                         | N/A      |
| Ethylene Glycol    | $\leq 2.52 \times 10^{-05}$ | 0.05 | N/A                         | N/A  | N/A | $\leq 5.54 \times 10^{-04}$ | N/A                         | N/A      |
| Formaldehyde       | $4.47 \times 10^{-05}$      | 0.11 | $8.71 \times 10^{-02}$      | 1.99 | a   | $4.16 \times 10^{-04}$      | $4.38 \times 10^{-02}$      | ↓ 99.05  |
| Furfural           | $\leq 4.20 \times 10^{-05}$ | 0.05 | $2.59 \times 10^{-02}$      | 1.74 | c   | $\leq 9.22 \times 10^{-04}$ | $1.49 \times 10^{-02}$      | ↓ ≥93.81 |
| Glycerol           | $2.46 \times 10^{+00}$      | 0.11 | $2.70 \times 10^{+00}$      | 1.99 | a   | $2.29 \times 10^{+01}$      | $1.36 \times 10^{+00}$      | 1584.45  |
| Glycidol           | NR                          | 0.05 | $1.76 \times 10^{-03}$      | 1.99 | a   | NR                          | $8.84 \times 10^{-04}$      | N/A      |
| Gold               | NT                          | 0.03 | N/A                         | N/A  | N/A | NT                          | N/A                         | N/A      |
| Isoamyl Acetate    | $\leq 4.80 \times 10^{-05}$ | 0.05 | N/A                         | N/A  | N/A | $\leq 1.05 \times 10^{-03}$ | N/A                         | N/A      |
| Isobutyl Acetate   | $\leq 3.00 \times 10^{-05}$ | 0.05 | N/A                         | N/A  | N/A | $\leq 6.58 \times 10^{-04}$ | N/A                         | N/A      |
| Isobutyraldehyde   | $\leq 8.26 \times 10^{-07}$ | 0.05 | N/A                         | N/A  | N/A | $\leq 1.81 \times 10^{-05}$ | N/A                         | N/A      |
| Isoprene           | $\leq 1.61 \times 10^{-04}$ | 0.03 | $7.99 \times 10^{-01}$      | 1.99 | a   | $\leq 4.69 \times 10^{-03}$ | $4.02 \times 10^{-01}$      | ↓ ≥98.83 |
| Lead               | $\leq 4.55 \times 10^{-08}$ | 0.05 | $3.12 \times 10^{-05}$      | 1.74 | c   | $\leq 9.99 \times 10^{-07}$ | $1.79 \times 10^{-05}$      | ↓ ≥94.43 |
| Menthol            | $3.44 \times 10^{-02}$      | 0.11 | $\leq 1.00 \times 10^{-05}$ | 2.10 | d   | $3.20 \times 10^{-01}$      | $\leq 4.76 \times 10^{-06}$ | NC       |
| Methyl Acetate     | $\leq 3.60 \times 10^{-05}$ | 0.05 | N/A                         | N/A  | N/A | $\leq 7.90 \times 10^{-04}$ | N/A                         | N/A      |
| Myosmine           | $\leq 3.28 \times 10^{-06}$ | 0.03 | N/A                         | N/A  | N/A | $\leq 9.56 \times 10^{-05}$ | N/A                         | N/A      |
| n-Butyraldehyde    | $\leq 1.76 \times 10^{-06}$ | 0.05 | $9.30 \times 10^{-02}$      | 1.99 | a   | $\leq 3.85 \times 10^{-05}$ | $4.67 \times 10^{-02}$      | ↓ ≥99.92 |
| Nickel             | $\leq 4.55 \times 10^{-07}$ | 0.11 | $\leq 1.29 \times 10^{-05}$ | 1.74 | c   | $\leq 4.23 \times 10^{-06}$ | $\leq 7.41 \times 10^{-06}$ | NC       |
| Nicotine           | $1.07 \times 10^{-01}$      | 0.11 | $1.99 \times 10^{+00}$      | 1.99 | a   | $1.00 \times 10^{+00}$      | $1.00 \times 10^{+00}$      | N/A      |

|                  |                            |      |                       |      |     |                            |                       |                |
|------------------|----------------------------|------|-----------------------|------|-----|----------------------------|-----------------------|----------------|
| Nicotine-N-Oxide | $\leq 8.72 \times 10^{-6}$ | 0.05 | N/A                   | N/A  | N/A | $\leq 1.91 \times 10^{-4}$ | N/A                   | N/A            |
| NNK              | $\leq 7.53 \times 10^{-9}$ | 0.05 | $2.95 \times 10^{-4}$ | 1.99 | a   | $\leq 1.65 \times 10^{-7}$ | $1.48 \times 10^{-4}$ | ↓ $\geq 99.89$ |
| NNN              | $\leq 4.92 \times 10^{-9}$ | 0.05 | $3.37 \times 10^{-4}$ | 1.99 | a   | $\leq 1.08 \times 10^{-7}$ | $1.69 \times 10^{-4}$ | ↓ $\geq 99.94$ |
| Nornicotine      | $\leq 3.41 \times 10^{-6}$ | 0.03 | N/A                   | N/A  | N/A | $\leq 9.96 \times 10^{-5}$ | N/A                   | N/A            |
| Propionic Acid   | $\leq 1.80 \times 10^{-5}$ | 0.05 | N/A                   | N/A  | N/A | $\leq 3.95 \times 10^{-4}$ | N/A                   | N/A            |
| Propylene Glycol | $9.92 \times 10^{-1}$      | 0.11 | $2.37 \times 10^{-2}$ | 1.74 | c   | $9.23 \times 10^{+0}$      | $1.36 \times 10^{-2}$ | 67634.83       |
| Propylene Oxide  | $\leq 1.56 \times 10^{-6}$ | 0.05 | $1.00 \times 10^{+0}$ | 1.99 | a   | $\leq 3.43 \times 10^{-5}$ | $5.03 \times 10^{-1}$ | ↓ $\geq 99.99$ |
| Toluene          | $\leq 6.12 \times 10^{-6}$ | 0.05 | $1.53 \times 10^{-1}$ | 1.99 | a   | $\leq 1.34 \times 10^{-4}$ | $7.69 \times 10^{-2}$ | ↓ $\geq 99.83$ |
| Water            | $4.95 \times 10^{-1}$      | 0.11 | $1.58 \times 10^{+1}$ | 1.89 | e   | $4.61 \times 10^{+0}$      | $8.36 \times 10^{+0}$ | ↓ 44.87        |

Average % Difference, Excluding Glycerol, PG and Water. a: Jaccard et al. 2019 b: Moldoveanu et al. 2017 c: Helen et al. 2018 d: Uchiyama et al. 2018 e: Schaller et al. 2016 f: Pappas et al. 2014 g: Roemer et al. 2012 h: IQOS PMTA, 2019.

**Table S14.** Comparison of HPHC and Chemical Non-Intense Aerosol Levels in Menthol 3.0% and Smoke Levels in 3R4F Reference Cigarette.

| HPHC Chemical      | JUUL Menthol 3.0% (mg/puff) |             | 3R4F (mg/cig)              |             |                | Chemical and HPHC Normalized by Nicotine (mg/mg) |                            | % Difference vs_3R4F |
|--------------------|-----------------------------|-------------|----------------------------|-------------|----------------|--------------------------------------------------|----------------------------|----------------------|
|                    | HPHC Chemical               | or Nicotine | HPHC Chemical              | or Nicotine | Source Journal | JUUL Virginia Tobacco 3.0%                       | 3R4F                       |                      |
| 1-Aminonaphthalene | $\leq 3.31 \times 10^{-10}$ | 0.03        | $1.42 \times 10^{-5}$      | 0.70        | a              | $\leq 9.66 \times 10^{-9}$                       | $2.02 \times 10^{-5}$      | ↓ $\geq 99.95$       |
| 1-Butanol          | $\leq 3.00 \times 10^{-5}$  | 0.03        | N/A                        | N/A         | N/A            | $\leq 1.18 \times 10^{-3}$                       | N/A                        | N/A                  |
| 1,3-Butadiene      | $\leq 1.61 \times 10^{-5}$  | 0.03        | $3.79 \times 10^{-2}$      | 0.70        | a              | $\leq 4.69 \times 10^{-4}$                       | $5.40 \times 10^{-2}$      | ↓ $\geq 99.13$       |
| 2-Aminonaphthalene | $\leq 3.37 \times 10^{-10}$ | 0.03        | $8.77 \times 10^{-6}$      | 0.70        | a              | $\leq 9.84 \times 10^{-9}$                       | $1.25 \times 10^{-5}$      | ↓ $\geq 99.92$       |
| 4-Aminobiphenyl    | $\leq 1.66 \times 10^{-10}$ | 0.03        | $1.54 \times 10^{-6}$      | 0.70        | a              | $\leq 4.85 \times 10^{-9}$                       | $2.19 \times 10^{-6}$      | ↓ $\geq 99.78$       |
| Acetaldehyde       | $\leq 2.16 \times 10^{-5}$  | 0.03        | $5.97 \times 10^{-1}$      | 0.70        | a              | $\leq 8.45 \times 10^{-4}$                       | $8.50 \times 10^{-1}$      | ↓ $\geq 99.90$       |
| Acetyl Propionyl   | $\leq 1.76 \times 10^{-6}$  | 0.03        | $2.95 \times 10^{-2}$      | 0.70        | b              | $\leq 6.88 \times 10^{-5}$                       | $4.21 \times 10^{-2}$      | ↓ $\geq 99.84$       |
| Acrolein           | $\leq 2.01 \times 10^{-5}$  | 0.05        | $5.32 \times 10^{-2}$      | 0.70        | a              | $\leq 4.03 \times 10^{-4}$                       | $7.58 \times 10^{-2}$      | ↓ $\geq 99.47$       |
| Acrylonitrile      | $\leq 3.20 \times 10^{-6}$  | 0.03        | $5.23 \times 10^{-3}$      | 0.70        | a              | $\leq 1.25 \times 10^{-4}$                       | $7.45 \times 10^{-3}$      | ↓ $\geq 98.32$       |
| Ammonia            | $\leq 6.64 \times 10^{-5}$  | 0.03        | $9.64 \times 10^{-3}$      | 0.70        | a              | $\leq 1.94 \times 10^{-3}$                       | $1.37 \times 10^{-2}$      | ↓ $\geq 85.88$       |
| Anabasine          | $\leq 3.64 \times 10^{-6}$  | 0.03        | N/A                        | N/A         | N/A            | $\leq 1.06 \times 10^{-4}$                       | N/A                        | N/A                  |
| Anatabine          | $\leq 3.30 \times 10^{-6}$  | 0.03        | N/A                        | N/A         | N/A            | $\leq 9.62 \times 10^{-5}$                       | N/A                        | N/A                  |
| Benzene            | $\leq 1.71 \times 10^{-6}$  | 0.03        | $3.36 \times 10^{-2}$      | 0.70        | a              | $\leq 6.68 \times 10^{-5}$                       | $4.79 \times 10^{-2}$      | ↓ $\geq 99.86$       |
| Benzo(a)pyrene     | $\leq 9.31 \times 10^{-10}$ | 0.03        | $6.30 \times 10^{-6}$      | 0.70        | a              | $\leq 2.72 \times 10^{-8}$                       | $8.97 \times 10^{-6}$      | ↓ $\geq 99.70$       |
| Benzoic Acid       | $4.10 \times 10^{-2}$       | 0.05        | N/A                        | N/A         | N/A            | $8.24 \times 10^{-1}$                            | N/A                        | N/A                  |
| Benzyl Acetate     | $\leq 3.00 \times 10^{-5}$  | 0.03        | N/A                        | N/A         | N/A            | $\leq 1.18 \times 10^{-3}$                       | N/A                        | N/A                  |
| β-Nicotyrine       | $\leq 8.25 \times 10^{-6}$  | 0.05        | N/A                        | N/A         | N/A            | $\leq 1.66 \times 10^{-4}$                       | N/A                        | N/A                  |
| Cadmium            | $\leq 5.25 \times 10^{-9}$  | 0.03        | $2.45 \times 10^{-5}$      | 0.70        | a              | $\leq 2.06 \times 10^{-7}$                       | $3.49 \times 10^{-5}$      | ↓ $\geq 99.41$       |
| Carbon Monoxide    | NT                          | 0.03        | $1.00 \times 10^{+1}$      | 0.70        | a              | NT                                               | $1.42 \times 10^{+1}$      | N/A                  |
| Chromium           | NDFB                        | 0.03        | $\leq 8.80 \times 10^{-7}$ | 0.70        | f              | NDFB                                             | $\leq 1.25 \times 10^{-6}$ | NC                   |

|                    |                             |      |                             |      |     |                             |                             |                |
|--------------------|-----------------------------|------|-----------------------------|------|-----|-----------------------------|-----------------------------|----------------|
| Copper             | $\leq 6.56 \times 10^{-08}$ | 0.03 | N/A                         | N/A  | N/A | $\leq 2.57 \times 10^{-06}$ | N/A                         | N/A            |
| Cotinine           | $\leq 4.06 \times 10^{-06}$ | 0.05 | N/A                         | N/A  | N/A | $\leq 8.16 \times 10^{-05}$ | N/A                         | N/A            |
| Crotonaldehyde     | $\leq 3.11 \times 10^{-06}$ | 0.03 | $9.89 \times 10^{-03}$      | 0.70 | a   | $\leq 1.22 \times 10^{-04}$ | $1.41 \times 10^{-02}$      | ↓ $\geq 99.13$ |
| Diacetyl           | $\leq 8.70 \times 10^{-07}$ | 0.03 | $1.15 \times 10^{-01}$      | 0.70 | b   | $\leq 3.41 \times 10^{-05}$ | $1.64 \times 10^{-01}$      | ↓ $\geq 99.98$ |
| Diethylene Glycol  | $\leq 1.20 \times 10^{-04}$ | 0.03 | N/A                         | N/A  | N/A | $\leq 4.70 \times 10^{-03}$ | N/A                         | N/A            |
| Ethyl Acetate      | $\leq 1.30 \times 10^{-04}$ | 0.03 | N/A                         | N/A  | N/A | $\leq 5.09 \times 10^{-03}$ | N/A                         | N/A            |
| Ethyl Acetoacetate | $\leq 2.40 \times 10^{-06}$ | 0.03 | N/A                         | N/A  | N/A | $\leq 9.40 \times 10^{-05}$ | N/A                         | N/A            |
| Ethylene Glycol    | $\leq 1.09 \times 10^{-04}$ | 0.03 | N/A                         | N/A  | N/A | $\leq 4.28 \times 10^{-03}$ | N/A                         | N/A            |
| Formaldehyde       | $2.19 \times 10^{-05}$      | 0.05 | $2.47 \times 10^{-02}$      | 0.70 | a   | $4.35 \times 10^{-04}$      | $3.52 \times 10^{-02}$      | ↓ 98.76        |
| Furfural           | $\leq 4.20 \times 10^{-05}$ | 0.03 | $1.40 \times 10^{-02}$      | 0.76 | d   | $\leq 1.65 \times 10^{-03}$ | $1.84 \times 10^{-02}$      | ↓ $\geq 91.07$ |
| Glycerol           | $1.22 \times 10^{+00}$      | 0.05 | $2.70 \times 10^{+00}$      | 0.70 | a   | $2.45 \times 10^{+01}$      | $3.85 \times 10^{+00}$      | 536.05         |
| Glycidol           | NR                          | 0.03 | N/A                         | N/A  | N/A | NR                          | N/A                         | N/A            |
| Gold               | NT                          | 0.03 | N/A                         | N/A  | N/A | NT                          | N/A                         | N/A            |
| Isoamyl Acetate    | $\leq 4.80 \times 10^{-05}$ | 0.03 | N/A                         | N/A  | N/A | $\leq 1.88 \times 10^{-03}$ | N/A                         | N/A            |
| Isobutyl Acetate   | $\leq 3.00 \times 10^{-05}$ | 0.03 | N/A                         | N/A  | N/A | $\leq 1.18 \times 10^{-03}$ | N/A                         | N/A            |
| Isobutyraldehyde   | $\leq 8.26 \times 10^{-07}$ | 0.03 | N/A                         | N/A  | N/A | $\leq 3.24 \times 10^{-05}$ | N/A                         | N/A            |
| Isoprene           | $\leq 1.61 \times 10^{-04}$ | 0.03 | $2.88 \times 10^{-01}$      | 0.70 | a   | $\leq 4.69 \times 10^{-03}$ | $4.10 \times 10^{-01}$      | ↓ $\geq 98.86$ |
| Lead               | $\leq 4.55 \times 10^{-08}$ | 0.03 | $9.20 \times 10^{-06}$      | 0.70 | f   | $\leq 1.78 \times 10^{-06}$ | $1.31 \times 10^{-05}$      | ↓ $\geq 86.39$ |
| Menthol            | $1.79 \times 10^{-02}$      | 0.05 | $\leq 1.00 \times 10^{-05}$ | 0.76 | a   | $3.55 \times 10^{-01}$      | $\leq 1.32 \times 10^{-05}$ | NC             |
| Methyl Acetate     | $\leq 3.60 \times 10^{-05}$ | 0.03 | N/A                         | N/A  | N/A | $\leq 1.41 \times 10^{-03}$ | N/A                         | N/A            |
| Myosmine           | $\leq 3.28 \times 10^{-06}$ | 0.03 | N/A                         | N/A  | N/A | $\leq 9.56 \times 10^{-05}$ | N/A                         | N/A            |
| n-Butyraldehyde    | $\leq 1.76 \times 10^{-06}$ | 0.03 | $2.84 \times 10^{-02}$      | 0.70 | a   | $\leq 6.88 \times 10^{-05}$ | $4.05 \times 10^{-02}$      | ↓ $\geq 99.83$ |
| Nickel             | $\leq 1.05 \times 10^{-07}$ | 0.03 | $\leq 3.80 \times 10^{-07}$ | 0.70 | f   | $\leq 4.11 \times 10^{-06}$ | $\leq 5.41 \times 10^{-07}$ | NC             |
| Nicotine           | $5.04 \times 10^{-02}$      | 0.05 | $7.02 \times 10^{-01}$      | 0.70 | a   | $1.00 \times 10^{+00}$      | $1.00 \times 10^{+00}$      | N/A            |
| Nicotine-N-Oxide   | $\leq 8.72 \times 10^{-06}$ | 0.03 | N/A                         | N/A  | N/A | $\leq 3.42 \times 10^{-04}$ | N/A                         | N/A            |
| NNK                | $\leq 7.53 \times 10^{-09}$ | 0.03 | $1.13 \times 10^{-04}$      | 0.70 | a   | $\leq 2.95 \times 10^{-07}$ | $1.61 \times 10^{-04}$      | ↓ $\geq 99.82$ |
| NNN                | $\leq 4.92 \times 10^{-09}$ | 0.03 | $1.31 \times 10^{-04}$      | 0.70 | a   | $\leq 1.93 \times 10^{-07}$ | $1.87 \times 10^{-04}$      | ↓ $\geq 99.90$ |
| Normicotine        | $\leq 3.41 \times 10^{-06}$ | 0.03 | N/A                         | N/A  | N/A | $\leq 9.96 \times 10^{-05}$ | N/A                         | N/A            |
| Propionic Acid     | $\leq 7.80 \times 10^{-05}$ | 0.03 | N/A                         | N/A  | N/A | $\leq 3.06 \times 10^{-03}$ | N/A                         | N/A            |
| Propylene Glycol   | $4.55 \times 10^{-01}$      | 0.05 | $3.20 \times 10^{-03}$      | 0.76 | d   | $9.02 \times 10^{+00}$      | $4.21 \times 10^{-03}$      | 214132.49      |
| Propylene Oxide    | $\leq 1.56 \times 10^{-06}$ | 0.03 | $2.97 \times 10^{-01}$      | 0.70 | a   | $\leq 6.12 \times 10^{-05}$ | $4.23 \times 10^{-01}$      | ↓ $\geq 99.99$ |
| Toluene            | $\leq 6.12 \times 10^{-06}$ | 0.03 | $5.14 \times 10^{-02}$      | 0.70 | a   | $\leq 2.40 \times 10^{-04}$ | $7.32 \times 10^{-02}$      | ↓ $\geq 99.67$ |
| Water              | $2.51 \times 10^{-01}$      | 0.05 | $3.20 \times 10^{+00}$      | 0.76 | d   | $5.04 \times 10^{+00}$      | $4.21 \times 10^{+00}$      | 19.67          |

Average % Difference, Excluding Glycerol, PG and Water. a: Jaccard et al. 2019 b: Moldoveanu et al. 2017 c: Helen et al. 2018 d: Uchiyama et al. 2018 e: Schaller et al. 2016 f: Pappas et al. 2014 g: Roemer et al. 2012 h: IQOS PMTA, 2019.

**Table S15.** Comparison of HPHC and Chemical Intense Aerosol Levels in Menthol 3.0% and Aerosol Levels in IQOS Menthol.

| HPHC Chemical      | JUUL Menthol 3.0%<br>(mg/puff) |             | IQOS Menthol (mg/cig)       |             |                | Chemical and HPHC<br>Normalized by Nicotine<br>(mg/mg) |                             | % Difference<br>vs_3R4F |
|--------------------|--------------------------------|-------------|-----------------------------|-------------|----------------|--------------------------------------------------------|-----------------------------|-------------------------|
|                    | HPHC Chemical                  | or Nicotine | HPHC Chemical               | or Nicotine | Source Journal | JUUL Virginia Tobacco 3.0%                             | 3R4F                        |                         |
| 1-Aminonaphthalene | $\leq 3.31 \times 10^{-10}$    | 0.03        | $8.60 \times 10^{-08}$      | 1.21        | e              | $\leq 9.66 \times 10^{-09}$                            | $7.11 \times 10^{-08}$      | ↓ ≥86.41                |
| 1-Butanol          | $\leq 3.00 \times 10^{-05}$    | 0.05        | N/A                         | N/A         | N/A            | $\leq 6.58 \times 10^{-04}$                            | N/A                         | N/A                     |
| 1,3-Butadiene      | $\leq 1.61 \times 10^{-05}$    | 0.03        | $2.65 \times 10^{-04}$      | 1.21        | e              | $\leq 4.69 \times 10^{-04}$                            | $2.19 \times 10^{-04}$      | NC                      |
| 2-Aminonaphthalene | $\leq 3.37 \times 10^{-10}$    | 0.03        | $\leq 3.50 \times 10^{-08}$ | 1.21        | e              | $\leq 9.84 \times 10^{-09}$                            | $\leq 2.89 \times 10^{-08}$ | NC                      |
| 4-Aminobiphenyl    | $\leq 1.66 \times 10^{-10}$    | 0.03        | $\leq 5.10 \times 10^{-08}$ | 1.21        | e              | $\leq 4.85 \times 10^{-09}$                            | $\leq 4.21 \times 10^{-08}$ | NC                      |
| Acetaldehyde       | $3.56 \times 10^{-05}$         | 0.11        | $2.05 \times 10^{-01}$      | 1.21        | e              | $3.31 \times 10^{-04}$                                 | $1.69 \times 10^{-01}$      | ↓ 99.80                 |
| Acetyl Propionyl   | $\leq 1.76 \times 10^{-06}$    | 0.05        | N/A                         | N/A         | N/A            | $\leq 3.85 \times 10^{-05}$                            | N/A                         | N/A                     |
| Acrolein           | $\leq 2.01 \times 10^{-05}$    | 0.09        | $9.15 \times 10^{-03}$      | 1.21        | e              | $\leq 2.14 \times 10^{-04}$                            | $7.56 \times 10^{-03}$      | ↓ ≥97.17                |
| Acrylonitrile      | $\leq 3.20 \times 10^{-06}$    | 0.05        | $2.20 \times 10^{-04}$      | 1.21        | e              | $\leq 7.02 \times 10^{-05}$                            | $1.82 \times 10^{-04}$      | ↓ ≥61.36                |
| Ammonia            | $\leq 6.64 \times 10^{-05}$    | 0.03        | $1.38 \times 10^{-02}$      | 1.21        | e              | $\leq 1.94 \times 10^{-03}$                            | $1.14 \times 10^{-02}$      | ↓ ≥83.00                |
| Anabasine          | $\leq 3.64 \times 10^{-06}$    | 0.03        | N/A                         | N/A         | N/A            | $\leq 1.06 \times 10^{-04}$                            | N/A                         | N/A                     |
| Anatabine          | $\leq 3.30 \times 10^{-06}$    | 0.03        | N/A                         | N/A         | N/A            | $\leq 9.62 \times 10^{-05}$                            | N/A                         | N/A                     |
| Benzene            | $\leq 1.71 \times 10^{-06}$    | 0.05        | $6.40 \times 10^{-04}$      | 1.21        | e              | $\leq 3.74 \times 10^{-05}$                            | $5.29 \times 10^{-04}$      | ↓ ≥92.92                |
| Benzo(a)pyrene     | $\leq 9.31 \times 10^{-10}$    | 0.03        | $1.29 \times 10^{-06}$      | 1.21        | e              | $\leq 2.72 \times 10^{-08}$                            | $1.07 \times 10^{-06}$      | ↓ ≥97.45                |
| Benzoic Acid       | $8.57 \times 10^{-02}$         | 0.11        | N/A                         | N/A         | N/A            | $7.97 \times 10^{-01}$                                 | N/A                         | N/A                     |
| Benzyl Acetate     | $\leq 3.00 \times 10^{-05}$    | 0.05        | N/A                         | N/A         | N/A            | $\leq 6.58 \times 10^{-04}$                            | N/A                         | N/A                     |
| β-Nicotyrine       | $\leq 8.25 \times 10^{-06}$    | 0.09        | N/A                         | N/A         | N/A            | $\leq 8.79 \times 10^{-05}$                            | N/A                         | N/A                     |
| Cadmium            | $\leq 5.25 \times 10^{-09}$    | 0.05        | $\leq 3.50 \times 10^{-07}$ | 1.21        | e              | $\leq 1.15 \times 10^{-07}$                            | $\leq 2.89 \times 10^{-07}$ | NC                      |
| Carbon Monoxide    | NT                             | 0.03        | $5.94 \times 10^{-01}$      | 1.21        | e              | NT                                                     | $4.91 \times 10^{-01}$      | N/A                     |
| Chromium           | NDFB                           | 0.05        | $\leq 5.50 \times 10^{-07}$ | 1.21        | e              | NDFB                                                   | $\leq 4.55 \times 10^{-07}$ | NC                      |
| Copper             | $\leq 2.84 \times 10^{-07}$    | 0.09        | N/A                         | N/A         | N/A            | $\leq 3.03 \times 10^{-06}$                            | N/A                         | N/A                     |
| Cotinine           | $\leq 4.06 \times 10^{-06}$    | 0.05        | N/A                         | N/A         | N/A            | $\leq 8.92 \times 10^{-05}$                            | N/A                         | N/A                     |
| Crotonaldehyde     | $\leq 3.11 \times 10^{-06}$    | 0.05        | $3.24 \times 10^{-03}$      | 1.21        | e              | $\leq 6.83 \times 10^{-05}$                            | $2.68 \times 10^{-03}$      | ↓ ≥97.45                |
| Diacetyl           | $\leq 8.70 \times 10^{-07}$    | 0.05        | $6.50 \times 10^{-02}$      | 1.20        | d              | $\leq 1.91 \times 10^{-05}$                            | $5.42 \times 10^{-02}$      | ↓ ≥99.96                |
| Diethylene Glycol  | $\leq 1.20 \times 10^{-04}$    | 0.05        | N/A                         | N/A         | N/A            | $\leq 2.63 \times 10^{-03}$                            | N/A                         | N/A                     |
| Ethyl Acetate      | $\leq 1.30 \times 10^{-04}$    | 0.05        | N/A                         | N/A         | N/A            | $\leq 2.85 \times 10^{-03}$                            | N/A                         | N/A                     |
| Ethyl Acetoacetate | $\leq 2.40 \times 10^{-06}$    | 0.05        | N/A                         | N/A         | N/A            | $\leq 5.27 \times 10^{-05}$                            | N/A                         | N/A                     |
| Ethylene Glycol    | $\leq 2.52 \times 10^{-05}$    | 0.05        | N/A                         | N/A         | N/A            | $\leq 5.54 \times 10^{-04}$                            | N/A                         | N/A                     |
| Formaldehyde       | $4.47 \times 10^{-05}$         | 0.11        | $4.55 \times 10^{-03}$      | 1.21        | e              | $4.16 \times 10^{-04}$                                 | $3.76 \times 10^{-03}$      | ↓ 88.94                 |
| Furfural           | $\leq 4.20 \times 10^{-05}$    | 0.05        | N/A                         | N/A         | N/A            | $\leq 9.22 \times 10^{-04}$                            | N/A                         | N/A                     |
| Glycerol           | $2.46 \times 10^{+00}$         | 0.11        | $3.94 \times 10^{+00}$      | 1.21        | N/A            | $2.29 \times 10^{+01}$                                 | $3.26 \times 10^{+00}$      | 601.87                  |

|                  |                         |      |                         |      |     |                         |                         |          |
|------------------|-------------------------|------|-------------------------|------|-----|-------------------------|-------------------------|----------|
| Glycidol         | NR                      | 0.05 | 1.10×10 <sup>-03</sup>  | 1.19 | h   | NR                      | 9.24×10 <sup>-04</sup>  | N/A      |
| Gold             | NT                      | 0.03 | N/A                     | N/A  | N/A | NT                      | N/A                     | N/A      |
| Isoamyl Acetate  | ≤4.80×10 <sup>-05</sup> | 0.05 | N/A                     | N/A  | N/A | ≤1.05×10 <sup>-03</sup> | N/A                     | N/A      |
| Isobutyl Acetate | ≤3.00×10 <sup>-05</sup> | 0.05 | N/A                     | N/A  | N/A | ≤6.58×10 <sup>-04</sup> | N/A                     | N/A      |
| Isobutyraldehyde | ≤8.26×10 <sup>-07</sup> | 0.05 | N/A                     | N/A  | N/A | ≤1.81×10 <sup>-05</sup> | N/A                     | N/A      |
| Isoprene         | ≤1.61×10 <sup>-04</sup> | 0.03 | 2.11×10 <sup>-03</sup>  | 1.21 | e   | ≤4.69×10 <sup>-03</sup> | 1.74×10 <sup>-03</sup>  | NC       |
| Lead             | ≤4.55×10 <sup>-08</sup> | 0.05 | ≤3.35×10 <sup>-06</sup> | 1.21 | e   | ≤9.99×10 <sup>-07</sup> | ≤2.77×10 <sup>-06</sup> | NC       |
| Menthol          | 3.44×10 <sup>-02</sup>  | 0.11 | 2.62×10 <sup>+00</sup>  | 1.21 | e   | 3.20×10 <sup>-01</sup>  | 2.17×10 <sup>+00</sup>  | ↓ 85.22  |
| Methyl Acetate   | ≤3.60×10 <sup>-05</sup> | 0.05 | N/A                     | N/A  | N/A | ≤7.90×10 <sup>-04</sup> | N/A                     | N/A      |
| Myosmine         | ≤3.28×10 <sup>-06</sup> | 0.03 | N/A                     | N/A  | N/A | ≤9.56×10 <sup>-05</sup> | N/A                     | N/A      |
| n-Butyraldehyde  | ≤1.76×10 <sup>-06</sup> | 0.05 | 2.67×10 <sup>-02</sup>  | 1.21 | e   | ≤3.85×10 <sup>-05</sup> | 2.21×10 <sup>-02</sup>  | ↓ ≥99.83 |
| Nickel           | ≤4.55×10 <sup>-07</sup> | 0.11 | ≤5.50×10 <sup>-07</sup> | 1.21 | e   | ≤4.23×10 <sup>-06</sup> | ≤4.55×10 <sup>-07</sup> | NC       |
| Nicotine         | 1.07×10 <sup>-01</sup>  | 0.11 | 1.21×10 <sup>+00</sup>  | 1.21 | e   | 1.00×10 <sup>+00</sup>  | 1.00×10 <sup>+00</sup>  | N/A      |
| Nicotine-N-Oxide | ≤8.72×10 <sup>-06</sup> | 0.05 | N/A                     | N/A  | N/A | ≤1.91×10 <sup>-04</sup> | N/A                     | N/A      |
| NNK              | ≤7.53×10 <sup>-09</sup> | 0.05 | 5.90×10 <sup>-06</sup>  | 1.21 | N/A | ≤1.65×10 <sup>-07</sup> | 4.88×10 <sup>-06</sup>  | ↓ ≥96.61 |
| NNN              | ≤4.92×10 <sup>-09</sup> | 0.05 | 1.37×10 <sup>-05</sup>  | 1.21 | e   | ≤1.08×10 <sup>-07</sup> | 1.13×10 <sup>-05</sup>  | ↓ ≥99.05 |
| Nornicotine      | ≤3.41×10 <sup>-06</sup> | 0.03 | N/A                     | N/A  | N/A | ≤9.96×10 <sup>-05</sup> | N/A                     | N/A      |
| Propionic Acid   | ≤1.80×10 <sup>-05</sup> | 0.05 | N/A                     | N/A  | N/A | ≤3.95×10 <sup>-04</sup> | N/A                     | N/A      |
| Propylene Glycol | 9.92×10 <sup>-01</sup>  | 0.11 | 3.90×10 <sup>-01</sup>  | 1.20 | d   | 9.23×10 <sup>+00</sup>  | 3.25×10 <sup>-01</sup>  | 2738.75  |
| Propylene Oxide  | ≤1.56×10 <sup>-06</sup> | 0.05 | 1.49×10 <sup>-04</sup>  | 1.21 | e   | ≤3.43×10 <sup>-05</sup> | 1.23×10 <sup>-04</sup>  | ↓ ≥72.19 |
| Toluene          | ≤6.12×10 <sup>-06</sup> | 0.05 | 2.39×10 <sup>-03</sup>  | 1.21 | e   | ≤1.34×10 <sup>-04</sup> | 1.98×10 <sup>-03</sup>  | ↓ ≥93.20 |
| Water            | 4.95×10 <sup>-01</sup>  | 0.11 | 2.97×10 <sup>+01</sup>  | 1.21 | e   | 4.61×10 <sup>+00</sup>  | 2.45×10 <sup>+01</sup>  | ↓ 81.22  |

Average % Difference, Excluding Glycerol, PG and Water. a: Jaccard et al. 2019 b: Moldoveanu et al. 2017 c: Helen et al. 2018 d: Uchiyama et al. 2018 e: Schaller et al. 2016 f: Pappas et al. 2014 g: Roemer et al. 2012 h: IQOS PMTA, 2019.

**Table S16.** Comparison of HPHCs in VT3 aerosol vs. comparator products.

| Chemical and HPHC  | HPHC or Chemical Normalized by Nicotine (mg/mg) |                              |                        |                        |                        | % Difference |          |          |
|--------------------|-------------------------------------------------|------------------------------|------------------------|------------------------|------------------------|--------------|----------|----------|
|                    | VT3                                             |                              | 3R4F                   |                        | IQOS                   | vs 3R4F      |          | vs IQOS  |
|                    | NI                                              | Intense                      | NI                     | Intense                | Intense                | NI           | Intense  | Intense  |
| 1-Aminonaphthalene | ≤1.22×10 <sup>-08a</sup>                        | ≤1.22×10 <sup>-08a</sup>     | 2.02×10 <sup>-05</sup> | 1.46×10 <sup>-05</sup> | 5.83×10 <sup>-08</sup> | ↓ ≥99.94     | ↓ ≥99.92 | ↓ ≥79.16 |
| 1-Butanol          | ≤1.02×10 <sup>-03a</sup>                        | ≤5.68×10 <sup>-04a</sup>     | N/A                    | N/A                    | N/A                    | N/A          | N/A      | N/A      |
| 1,3-Butadiene      | ≤4.24×10 <sup>-05a</sup>                        | ≤4.23×10 <sup>-05a</sup>     | 5.40×10 <sup>-02</sup> | 5.03×10 <sup>-02</sup> | 2.23×10 <sup>-04</sup> | ↓ ≥99.92     | ↓ ≥99.92 | ↓ ≥80.99 |
| 2-Aminonaphthalene | ≤5.29×10 <sup>-09a</sup>                        | ≤5.29×10 <sup>-09a</sup>     | 1.25×10 <sup>-05</sup> | 9.10×10 <sup>-06</sup> | 3.48×10 <sup>-08</sup> | ↓ ≥99.96     | ↓ ≥99.94 | ↓ ≥84.82 |
| 4-Aminobiphenyl    | ≤2.13×10 <sup>-09a</sup>                        | ≤2.12×10 <sup>-09a</sup>     | 2.19×10 <sup>-06</sup> | 1.96×10 <sup>-06</sup> | 6.98×10 <sup>-09</sup> | ↓ ≥99.90     | ↓ ≥99.89 | ↓ ≥69.55 |
| Acetaldehyde       | <b>6.49×10<sup>-04</sup></b>                    | <b>4.13×10<sup>-04</sup></b> | 8.50×10 <sup>-01</sup> | 9.24×10 <sup>-01</sup> | 1.66×10 <sup>-01</sup> | ↓ 99.92      | ↓ 99.96  | ↓ 99.75  |
| Acetyl Propionyl   | ≤5.99×10 <sup>-05a</sup>                        | ≤3.33×10 <sup>-05a</sup>     | 4.21×10 <sup>-02</sup> | 4.62×10 <sup>-02</sup> | N/A                    | ↓ ≥99.86     | ↓ ≥99.93 | N/A      |
| Acrolein           | ≤3.55×10 <sup>-04a,b</sup>                      | ≤1.91×10 <sup>-04a,b</sup>   | 7.58×10 <sup>-02</sup> | 9.05×10 <sup>-02</sup> | 8.56×10 <sup>-03</sup> | ↓ ≥99.53     | ↓ ≥99.79 | ↓ ≥97.77 |

|                    |                                          |                                          |                             |                             |                             |                         |                         |                         |
|--------------------|------------------------------------------|------------------------------------------|-----------------------------|-----------------------------|-----------------------------|-------------------------|-------------------------|-------------------------|
| Acrylonitrile      | $\leq 1.09 \times 10^{-04a}$             | $\leq 6.06 \times 10^{-05a}$             | $7.45 \times 10^{-03}$      | $1.03 \times 10^{-02}$      | $1.95 \times 10^{-04}$      | $\downarrow \geq 98.53$ | $\downarrow \geq 99.41$ | $\downarrow \geq 68.99$ |
| Ammonia            | $\leq 5.92 \times 10^{-04a}$             | $\leq 5.92 \times 10^{-04a}$             | $1.37 \times 10^{-02}$      | $1.71 \times 10^{-02}$      | $1.08 \times 10^{-02}$      | $\downarrow \geq 95.69$ | $\downarrow \geq 96.53$ | $\downarrow \geq 94.50$ |
| Anabasine          | $\leq 4.27 \times 10^{-05a}$             | $\leq 4.27 \times 10^{-05a}$             | N/A                         | N/A                         | N/A                         | N/A                     | N/A                     | N/A                     |
| Anatabine          | $\leq 3.53 \times 10^{-05a}$             | $\leq 3.53 \times 10^{-05a}$             | N/A                         | N/A                         | N/A                         | N/A                     | N/A                     | N/A                     |
| Benzene            | $\leq 5.82 \times 10^{-05a}$             | $\leq 3.23 \times 10^{-05a}$             | $4.79 \times 10^{-02}$      | $4.46 \times 10^{-02}$      | $4.92 \times 10^{-04}$      | $\downarrow \geq 99.88$ | $\downarrow \geq 99.93$ | $\downarrow \geq 93.43$ |
| Benzo(a)pyrene     | $\leq 7.89 \times 10^{-08a}$             | $\leq 7.89 \times 10^{-08a}$             | $8.97 \times 10^{-06}$      | $7.59 \times 10^{-06}$      | $5.71 \times 10^{-07}$      | $\downarrow \geq 99.12$ | $\downarrow \geq 98.96$ | $\downarrow \geq 86.17$ |
| Benzoic Acid       | <b><math>8.46 \times 10^{-01}</math></b> | <b><math>7.97 \times 10^{-01}</math></b> | N/A                         | N/A                         | N/A                         | N/A                     | N/A                     | N/A                     |
| Benzyl Acetate     | $\leq 1.02 \times 10^{-03a}$             | $\leq 5.68 \times 10^{-04a}$             | N/A                         | N/A                         | N/A                         | N/A                     | N/A                     | N/A                     |
| β-Nicotyrine       | $\leq 1.46 \times 10^{-04a,b}$           | $\leq 7.82 \times 10^{-05a,b}$           | N/A                         | N/A                         | N/A                         | N/A                     | N/A                     | N/A                     |
| Cadmium            | $\leq 1.79 \times 10^{-07a}$             | $\leq 9.94 \times 10^{-08a}$             | $3.49 \times 10^{-05}$      | $4.68 \times 10^{-05}$      | $\leq 2.65 \times 10^{-07}$ | $\downarrow \geq 99.49$ | $\downarrow \geq 99.79$ | NC                      |
| Carbon Monoxide    | $\leq 7.80 \times 10^{-02a}$             | $\leq 7.80 \times 10^{-02a}$             | $1.42 \times 10^{+01}$      | $1.53 \times 10^{+01}$      | $4.02 \times 10^{-01}$      | $\downarrow \geq 99.45$ | $\downarrow \geq 99.49$ | $\downarrow \geq 80.62$ |
| Chromium           | NDFB                                     | NDFB                                     | $\leq 1.25 \times 10^{-06}$ | $\leq 6.84 \times 10^{-06}$ | $\leq 4.17 \times 10^{-07}$ | NC                      | NC                      | NC                      |
| Copper             | $\leq 9.70 \times 10^{-06a,b}$           | $\leq 5.39 \times 10^{-06a,b}$           | N/A                         | N/A                         | N/A                         | N/A                     | N/A                     | N/A                     |
| Cotinine           | $\leq 1.39 \times 10^{-04b}$             | $\leq 1.78 \times 10^{-05a}$             | N/A                         | N/A                         | N/A                         | N/A                     | N/A                     | N/A                     |
| Crotonaldehyde     | $\leq 1.06 \times 10^{-04a}$             | $\leq 5.90 \times 10^{-05a}$             | $1.41 \times 10^{-02}$      | $2.99 \times 10^{-02}$      | $3.14 \times 10^{-03}$      | $\downarrow \geq 99.25$ | $\downarrow \geq 99.80$ | $\downarrow \geq 98.12$ |
| Diacetyl           | $\leq 2.97 \times 10^{-05a}$             | $\leq 1.65 \times 10^{-05a}$             | $1.64 \times 10^{-01}$      | $1.69 \times 10^{-01}$      | $3.58 \times 10^{-02}$      | $\downarrow \geq 99.98$ | $\downarrow \geq 99.99$ | $\downarrow \geq 99.95$ |
| Diethylene Glycol  | $\leq 4.09 \times 10^{-03a}$             | $\leq 2.27 \times 10^{-03a}$             | N/A                         | N/A                         | N/A                         | N/A                     | N/A                     | N/A                     |
| Ethyl Acetate      | $\leq 4.43 \times 10^{-03a,b}$           | $\leq 1.23 \times 10^{-03a,b}$           | N/A                         | N/A                         | N/A                         | N/A                     | N/A                     | N/A                     |
| Ethyl Acetoacetate | $\leq 8.19 \times 10^{-05a}$             | $\leq 4.54 \times 10^{-05a}$             | N/A                         | N/A                         | N/A                         | N/A                     | N/A                     | N/A                     |
| Ethylene Glycol    | $\leq 3.73 \times 10^{-03b}$             | $\leq 2.07 \times 10^{-03b}$             | N/A                         | N/A                         | N/A                         | N/A                     | N/A                     | N/A                     |
| Formaldehyde       | <b><math>1.35 \times 10^{-03}</math></b> | <b><math>8.27 \times 10^{-04}</math></b> | $3.52 \times 10^{-02}$      | $4.38 \times 10^{-02}$      | $4.19 \times 10^{-03}$      | $\downarrow \geq 96.16$ | $\downarrow \geq 98.11$ | $\downarrow \geq 80.27$ |
| Furfural           | $\leq 1.43 \times 10^{-03a}$             | $\leq 7.95 \times 10^{-04a}$             | $1.84 \times 10^{-02}$      | $1.49 \times 10^{-02}$      | $2.41 \times 10^{-02}$      | $\downarrow \geq 92.22$ | $\downarrow \geq 94.66$ | $\downarrow \geq 96.70$ |
| Glycerol           | <b><math>2.31 \times 10^{+01}</math></b> | <b><math>2.27 \times 10^{+01}</math></b> | $3.85 \times 10^{+00}$      | $1.36 \times 10^{+00}$      | $3.51 \times 10^{+00}$      | $4.99 \times 10^{+02}$  | $1.57 \times 10^{+03}$  | $5.47 \times 10^{+02}$  |
| Glycidol           | NR                                       | NR                                       | N/A                         | $8.84 \times 10^{-04}$      | $4.43 \times 10^{-03}$      | NC                      | NC                      | NC                      |
| Gold               | $\leq 9.41 \times 10^{-08a}$             | $\leq 9.40 \times 10^{-08a}$             | N/A                         | N/A                         | N/A                         | N/A                     | N/A                     | N/A                     |
| Isoamyl Acetate    | $\leq 1.64 \times 10^{-03a}$             | $\leq 9.09 \times 10^{-04a}$             | N/A                         | N/A                         | N/A                         | N/A                     | N/A                     | N/A                     |
| Isobutyl Acetate   | $\leq 1.02 \times 10^{-03a}$             | $\leq 5.68 \times 10^{-04a}$             | N/A                         | N/A                         | N/A                         | N/A                     | N/A                     | N/A                     |
| Isobutyraldehyde   | $\leq 2.82 \times 10^{-05a}$             | $\leq 1.57 \times 10^{-05a}$             | N/A                         | N/A                         | N/A                         | N/A                     | N/A                     | N/A                     |
| Isoprene           | $\leq 6.03 \times 10^{-05a}$             | $\leq 6.03 \times 10^{-05a}$             | $4.10 \times 10^{-01}$      | $4.02 \times 10^{-01}$      | $1.78 \times 10^{-03}$      | $\downarrow \geq 99.99$ | $\downarrow \geq 99.98$ | $\downarrow \geq 96.61$ |
| Lead               | $\leq 1.55 \times 10^{-06b}$             | NDFB                                     | $1.31 \times 10^{-05}$      | $1.79 \times 10^{-05}$      | $1.73 \times 10^{-06}$      | $\downarrow \geq 88.16$ | NC                      | NC                      |
| Menthol            | $\leq 4.17 \times 10^{-03a}$             | $\leq 2.31 \times 10^{-03a}$             | $\leq 1.32 \times 10^{-05}$ | $\leq 4.76 \times 10^{-06}$ | $3.42 \times 10^{-04}$      | NC                      | NC                      | NC                      |
| Methyl Acetate     | $\leq 1.23 \times 10^{-03a}$             | $\leq 6.82 \times 10^{-04a}$             | N/A                         | N/A                         | N/A                         | N/A                     | N/A                     | N/A                     |
| Myosmine           | $\leq 2.86 \times 10^{-04a}$             | $\leq 2.86 \times 10^{-04a}$             | N/A                         | N/A                         | N/A                         | N/A                     | N/A                     | N/A                     |
| n-Butyraldehyde    | $\leq 5.99 \times 10^{-05a}$             | $\leq 3.33 \times 10^{-05a}$             | $4.05 \times 10^{-02}$      | $4.67 \times 10^{-02}$      | $1.98 \times 10^{-02}$      | $\downarrow \geq 99.85$ | $\downarrow \geq 99.93$ | $\downarrow \geq 99.83$ |
| Nickel             | $\leq 8.03 \times 10^{-06b}$             | $\leq 8.62 \times 10^{-06b}$             | $\leq 5.41 \times 10^{-07}$ | $\leq 7.41 \times 10^{-06}$ | $\leq 4.17 \times 10^{-07}$ | NC                      | NC                      | NC                      |
| Nicotine           | <b><math>1.00 \times 10^{+00}</math></b> | <b><math>1.00 \times 10^{+00}</math></b> | $1.00 \times 10^{+00}$      | $1.00 \times 10^{+00}$      | $1.00 \times 10^{+00}$      | N/A                     | N/A                     | N/A                     |
| Nicotine-N-Oxide   | $\leq 2.97 \times 10^{-04a}$             | $\leq 1.65 \times 10^{-04a}$             | N/A                         | N/A                         | N/A                         | N/A                     | N/A                     | N/A                     |

|                    |                                           |                                           |                        |                        |                        |                           |                           |                           |
|--------------------|-------------------------------------------|-------------------------------------------|------------------------|------------------------|------------------------|---------------------------|---------------------------|---------------------------|
| NNK                | $\leq 2.57 \times 10^{-07a}$              | $\leq 1.43 \times 10^{-07a}$              | $1.61 \times 10^{-04}$ | $1.48 \times 10^{-04}$ | $5.08 \times 10^{-06}$ | $\downarrow \geq 99.84$   | $\downarrow \geq 99.90$   | $\downarrow \geq 97.19$   |
| NNN                | $\leq 1.68 \times 10^{-07a}$              | $\leq 9.32 \times 10^{-08a}$              | $1.87 \times 10^{-04}$ | $1.69 \times 10^{-04}$ | $1.30 \times 10^{-05}$ | $\downarrow \geq 99.91$   | $\downarrow \geq 99.94$   | $\downarrow \geq 99.28$   |
| <i>Nornicotine</i> | <b><math>2.47 \times 10^{-04d}</math></b> | <b><math>2.47 \times 10^{-04d}</math></b> | N/A                    | N/A                    | N/A                    | N/A                       | N/A                       | N/A                       |
| Propionic Acid     | $\leq 2.66 \times 10^{-03b}$              | $\leq 1.79 \times 10^{-03a,b}$            | N/A                    | N/A                    | N/A                    | N/A                       | N/A                       | N/A                       |
| Propylene Glycol   | <b><math>8.85 \times 10^{+00}</math></b>  | <b><math>8.71 \times 10^{+00}</math></b>  | $4.21 \times 10^{-03}$ | $1.36 \times 10^{-02}$ | $1.36 \times 10^{-01}$ | $2.10 \times 10^{+05}$    | $6.39 \times 10^{+04}$    | $6.32 \times 10^{+03}$    |
| Propylene Oxide    | $\leq 5.32 \times 10^{-05a}$              | $\leq 2.96 \times 10^{-05a}$              | $4.23 \times 10^{-01}$ | $5.03 \times 10^{-01}$ | $1.12 \times 10^{-04}$ | $\downarrow \geq 99.99$   | $\downarrow \geq 99.99$   | $\downarrow \geq 73.64$   |
| Toluene            | $\leq 2.09 \times 10^{-04a}$              | $\leq 1.16 \times 10^{-04a}$              | $7.32 \times 10^{-02}$ | $7.69 \times 10^{-02}$ | $1.96 \times 10^{-03}$ | $\downarrow \geq 99.72$   | $\downarrow \geq 99.85$   | $\downarrow \geq 94.10$   |
| Water              | <b><math>5.13 \times 10^{+00}</math></b>  | <b><math>4.33 \times 10^{+00}</math></b>  | $4.21 \times 10^{+00}$ | $8.36 \times 10^{+00}$ | $2.77 \times 10^{+01}$ | <b>21.78</b>              | $\downarrow$ <b>48.20</b> | $\downarrow$ <b>84.34</b> |
|                    |                                           |                                           |                        |                        |                        | Average <sup>c</sup>      | Average <sup>c</sup>      | Average <sup>c</sup>      |
|                    |                                           |                                           |                        |                        |                        | $\downarrow$ <b>98.59</b> | $\downarrow$ 99.37        | $\downarrow$ 89.12        |

BLOD = Below limit of quantitation; BLOQ=Below limit of quantitation; NDFB=Not different from background,  $\downarrow$ = less than, Bolded reductions were based on quantifiable values. Analytes in italics were tested under a single modified puffing regimen: 70mL puff, 3 second duration, 30 second interval<sup>a</sup> analyte was BLOD for all three 50 puff blocks <sup>b</sup> analyte was BLOQ for all three 50 puff blocks <sup>a,b</sup> analyte was either BLOD or BLOQ for all three 50 puff blocks <sup>c</sup> excluding PG,VG and water.

Table S17. Comparison of HPHCs in Me3 aerosol vs. comparator products.

| Chemical and<br>HPHC    | HPHC or Chemical Normalized by Nicotine (mg/mg) |                                          |                             |                             |                             | % Difference            |                         |                         |
|-------------------------|-------------------------------------------------|------------------------------------------|-----------------------------|-----------------------------|-----------------------------|-------------------------|-------------------------|-------------------------|
|                         | VT3                                             |                                          | 3R4F                        |                             | IQOS                        | vs IQOS                 |                         |                         |
|                         | NI                                              | Intense                                  | NI                          | Intense                     | Intense                     | NI                      | Intense                 | Intense                 |
| 1-                      |                                                 |                                          |                             |                             |                             |                         |                         |                         |
| <i>Aminonaphthalene</i> | $\leq 9.66 \times 10^{-09a}$                    | $\leq 9.66 \times 10^{-09a}$             | $2.02 \times 10^{-05}$      | $1.46 \times 10^{-05}$      | $7.11 \times 10^{-08}$      | $\downarrow \geq 99.95$ | $\downarrow \geq 99.93$ | $\downarrow \geq 86.41$ |
| 1-Butanol               | $\leq 1.18 \times 10^{-03}$                     | $\leq 6.58 \times 10^{-04}$              | N/A                         | N/A                         | N/A                         | N/A                     | N/A                     | N/A                     |
| 1,3-Butadiene           | $\leq 4.69 \times 10^{-04a}$                    | $\leq 4.69 \times 10^{-04a}$             | $5.40 \times 10^{-02}$      | $5.03 \times 10^{-02}$      | $2.19 \times 10^{-04}$      | $\downarrow \geq 99.13$ | $\downarrow \geq 99.07$ | NC                      |
| 2-                      |                                                 |                                          |                             |                             |                             |                         |                         |                         |
| <i>Aminonaphthalene</i> | $\leq 9.84 \times 10^{-09a}$                    | $\leq 9.84 \times 10^{-09a}$             | $1.25 \times 10^{-05}$      | $9.10 \times 10^{-06}$      | $\leq 2.89 \times 10^{-08}$ | $\downarrow \geq 99.92$ | $\downarrow \geq 99.89$ | NC                      |
| 4-                      |                                                 |                                          |                             |                             |                             |                         |                         |                         |
| <i>Aminobiphenyl</i>    | $\leq 4.85 \times 10^{-09a}$                    | $\leq 4.85 \times 10^{-09a}$             | $2.19 \times 10^{-06}$      | $1.96 \times 10^{-06}$      | $\leq 4.21 \times 10^{-08}$ | $\downarrow \geq 99.78$ | $\downarrow \geq 99.75$ | NC                      |
| Acetaldehyde            | $\leq 8.45 \times 10^{-04b}$                    | <b><math>3.31 \times 10^{-04}</math></b> | $8.50 \times 10^{-01}$      | $9.24 \times 10^{-01}$      | $1.69 \times 10^{-01}$      | $\downarrow \geq 99.90$ | $\downarrow$ 99.96      | $\downarrow$ 99.80      |
| Acetyl Propionyl        | $\leq 6.88 \times 10^{-05a}$                    | $\leq 3.85 \times 10^{-05a}$             | $4.21 \times 10^{-02}$      | $4.62 \times 10^{-02}$      | N/A                         | $\downarrow \geq 99.84$ | $\downarrow \geq 99.92$ | N/A                     |
| Acrolein                | $\leq 4.03 \times 10^{-04a,b}$                  | $\leq 2.14 \times 10^{-04a,b}$           | $7.58 \times 10^{-02}$      | $9.05 \times 10^{-02}$      | $7.56 \times 10^{-03}$      | $\downarrow \geq 99.47$ | $\downarrow \geq 99.76$ | $\downarrow \geq 97.17$ |
| Acrylonitrile           | $\leq 1.25 \times 10^{-04a}$                    | $\leq 7.02 \times 10^{-05a}$             | $7.45 \times 10^{-03}$      | $1.03 \times 10^{-02}$      | $1.82 \times 10^{-04}$      | $\downarrow \geq 98.32$ | $\downarrow \geq 99.32$ | $\downarrow \geq 61.36$ |
| Ammonia                 | $\leq 1.94 \times 10^{-03a}$                    | $\leq 1.94 \times 10^{-03a}$             | $1.37 \times 10^{-02}$      | $1.71 \times 10^{-02}$      | $1.14 \times 10^{-02}$      | $\downarrow \geq 85.88$ | $\downarrow \geq 88.65$ | $\downarrow \geq 83.00$ |
| Anabasine               | $\leq 1.06 \times 10^{-04d}$                    | $\leq 1.06 \times 10^{-04d}$             | N/A                         | N/A                         | N/A                         | N/A                     | N/A                     | N/A                     |
| Anatabine               | $\leq 9.62 \times 10^{-05d}$                    | $\leq 9.62 \times 10^{-05d}$             | N/A                         | N/A                         | N/A                         | N/A                     | N/A                     | N/A                     |
| Benzene                 | $\leq 6.68 \times 10^{-05a}$                    | $\leq 3.74 \times 10^{-05a}$             | $4.79 \times 10^{-02}$      | $4.46 \times 10^{-02}$      | $5.29 \times 10^{-04}$      | $\downarrow \geq 99.86$ | $\downarrow \geq 99.92$ | $\downarrow \geq 92.92$ |
| Benzo(a)pyrene          | $\leq 2.72 \times 10^{-08d}$                    | $\leq 2.72 \times 10^{-08d}$             | $8.97 \times 10^{-06}$      | $7.59 \times 10^{-06}$      | $1.07 \times 10^{-06}$      | $\downarrow \geq 99.70$ | $\downarrow \geq 99.64$ | $\downarrow \geq 97.45$ |
| Benzoic Acid            | <b><math>8.24 \times 10^{-01}</math></b>        | <b><math>7.97 \times 10^{-01}</math></b> | N/A                         | N/A                         | N/A                         | N/A                     | N/A                     | N/A                     |
| Benzyl Acetate          | $\leq 1.18 \times 10^{-03a}$                    | $\leq 6.58 \times 10^{-04a}$             | N/A                         | N/A                         | N/A                         | N/A                     | N/A                     | N/A                     |
| $\beta$ -Nicotyrine     | $\leq 1.66 \times 10^{-04a,b}$                  | $\leq 8.79 \times 10^{-05a,b}$           | N/A                         | N/A                         | N/A                         | N/A                     | N/A                     | N/A                     |
| Cadmium                 | $\leq 2.06 \times 10^{-07a}$                    | $\leq 1.15 \times 10^{-07a}$             | $3.49 \times 10^{-05}$      | $4.68 \times 10^{-05}$      | $\leq 2.89 \times 10^{-07}$ | $\downarrow \geq 99.41$ | $\downarrow \geq 99.75$ | NC                      |
| Carbon Monoxide         | NT                                              | NT                                       | $1.42 \times 10^{+01}$      | $1.53 \times 10^{+01}$      | $4.91 \times 10^{+01}$      | N/A                     | N/A                     | N/A                     |
| Chromium                | NDFB                                            | NDFB                                     | $\leq 1.25 \times 10^{-06}$ | $\leq 6.84 \times 10^{-06}$ | $\leq 4.55 \times 10^{-07}$ | NC                      | NC                      | NC                      |

|                    |                                          |                                          |                            |                            |                            |                                      |                                      |                                      |
|--------------------|------------------------------------------|------------------------------------------|----------------------------|----------------------------|----------------------------|--------------------------------------|--------------------------------------|--------------------------------------|
| Copper             | $\leq 2.57 \times 10^{-6a}$              | $\leq 3.03 \times 10^{-6a,b}$            | N/A                        | N/A                        | N/A                        | N/A                                  | N/A                                  | N/A                                  |
| Cotinine           | $\leq 8.16 \times 10^{-5a,b}$            | $\leq 8.92 \times 10^{-5b}$              | N/A                        | N/A                        | N/A                        | N/A                                  | N/A                                  | N/A                                  |
| Crotonaldehyde     | $\leq 1.22 \times 10^{-4a}$              | $\leq 6.83 \times 10^{-5a}$              | $1.41 \times 10^{-2}$      | $2.99 \times 10^{-2}$      | $2.68 \times 10^{-3}$      | $\downarrow \geq 99.13$              | $\downarrow \geq 99.77$              | $\downarrow \geq 97.45$              |
| Diacetyl           | $\leq 3.41 \times 10^{-5a}$              | $\leq 1.91 \times 10^{-5a}$              | $1.64 \times 10^{-1}$      | $1.69 \times 10^{-1}$      | $5.42 \times 10^{-2}$      | $\downarrow \geq 99.98$              | $\downarrow \geq 99.99$              | $\downarrow \geq 99.96$              |
| Diethylene Glycol  | $\leq 4.70 \times 10^{-3a}$              | $\leq 2.63 \times 10^{-3a}$              | N/A                        | N/A                        | N/A                        | N/A                                  | N/A                                  | N/A                                  |
| Ethyl Acetate      | $\leq 5.09 \times 10^{-3b}$              | $\leq 2.85 \times 10^{-3a,b}$            | N/A                        | N/A                        | N/A                        | N/A                                  | N/A                                  | N/A                                  |
| Ethyl Acetoacetate | $\leq 9.40 \times 10^{-5a}$              | $\leq 5.27 \times 10^{-5a}$              | N/A                        | N/A                        | N/A                        | N/A                                  | N/A                                  | N/A                                  |
| Ethylene Glycol    | $\leq 4.28 \times 10^{-3b}$              | $\leq 5.54 \times 10^{-4b}$              | N/A                        | N/A                        | N/A                        | N/A                                  | N/A                                  | N/A                                  |
| Formaldehyde       | <b><math>4.35 \times 10^{-4}</math></b>  | <b><math>4.16 \times 10^{-4}</math></b>  | $3.52 \times 10^{-2}$      | $4.38 \times 10^{-2}$      | $3.76 \times 10^{-3}$      | $\downarrow$ <b>98.76</b>            | $\downarrow$ <b>99.05</b>            | $\downarrow$ <b>88.94</b>            |
| Furfural           | $\leq 1.65 \times 10^{-3a}$              | $\leq 9.22 \times 10^{-4a}$              | $1.84 \times 10^{-2}$      | $1.49 \times 10^{-2}$      | N/A                        | $\downarrow \geq 91.07$              | $\downarrow \geq 93.81$              | N/A                                  |
| Glycerol           | <b><math>2.45 \times 10^{+01}</math></b> | <b><math>2.29 \times 10^{+01}</math></b> | $3.85 \times 10^{+00}$     | $1.36 \times 10^{+00}$     | $3.26 \times 10^{+00}$     | $5.36 \times 10^{+02}$               | $1.58 \times 10^{+03}$               | $6.01 \times 10^{+02}$               |
| Glycidol           | NR                                       | NR                                       | N/A                        | $8.84 \times 10^{-4}$      | $9.24 \times 10^{-4}$      | NC                                   | NC                                   | NC                                   |
| Gold               | NT                                       | NT                                       | N/A                        | N/A                        | N/A                        | N/A                                  | N/A                                  | N/A                                  |
| Isoamyl Acetate    | $\leq 1.88 \times 10^{-3a}$              | $\leq 1.05 \times 10^{-3a}$              | N/A                        | N/A                        | N/A                        | N/A                                  | N/A                                  | N/A                                  |
| Isobutyl Acetate   | $\leq 1.18 \times 10^{-3a}$              | $\leq 6.58 \times 10^{-4a}$              | N/A                        | N/A                        | N/A                        | N/A                                  | N/A                                  | N/A                                  |
| Isobutyraldehyde   | $\leq 3.24 \times 10^{-5a}$              | $\leq 1.81 \times 10^{-5a}$              | N/A                        | N/A                        | N/A                        | N/A                                  | N/A                                  | N/A                                  |
| <i>Isoprene</i>    | $\leq 4.69 \times 10^{-3a}$              | $\leq 4.69 \times 10^{-3a}$              | $4.10 \times 10^{-1}$      | $4.02 \times 10^{-1}$      | $1.74 \times 10^{-3}$      | $\downarrow \geq 98.86$              | $\downarrow \geq 98.83$              | NC                                   |
| Lead               | $\leq 1.78 \times 10^{-6b}$              | $\leq 9.99 \times 10^{-7a,b}$            | $1.31 \times 10^{-5}$      | $1.79 \times 10^{-5}$      | $\leq 2.77 \times 10^{-6}$ | $\downarrow \geq 86.39$              | $\downarrow \geq 94.43$              | NC                                   |
| Menthol            | $3.55 \times 10^{-1}$                    | $3.20 \times 10^{-1}$                    | $\leq 1.32 \times 10^{-5}$ | $\leq 4.76 \times 10^{-6}$ | $2.17 \times 10^{+00}$     | NC                                   | NC                                   | $\downarrow$ 85.22                   |
| Methyl Acetate     | $\leq 1.41 \times 10^{-3a}$              | $\leq 7.90 \times 10^{-4a}$              | N/A                        | N/A                        | N/A                        | N/A                                  | N/A                                  | N/A                                  |
| <i>Myosmine</i>    | $\leq 9.56 \times 10^{-5a}$              | $\leq 9.56 \times 10^{-5a}$              | N/A                        | N/A                        | N/A                        | N/A                                  | N/A                                  | N/A                                  |
| n-Butyraldehyde    | $\leq 6.88 \times 10^{-5a}$              | $\leq 3.85 \times 10^{-5a}$              | $4.05 \times 10^{-2}$      | $4.67 \times 10^{-2}$      | $2.21 \times 10^{-2}$      | $\downarrow \geq 99.83$              | $\downarrow \geq 99.92$              | $\downarrow \geq 99.83$              |
| Nickel             | $\leq 4.11 \times 10^{-6a}$              | $\leq 4.23 \times 10^{-6a,b}$            | $\leq 5.41 \times 10^{-7}$ | $\leq 7.41 \times 10^{-6}$ | $\leq 4.55 \times 10^{-7}$ | NC                                   | NC                                   | NC                                   |
| Nicotine           | <b><math>1.00 \times 10^{+00}</math></b> | <b><math>1.00 \times 10^{+00}</math></b> | $1.00 \times 10^{+00}$     | $1.00 \times 10^{+00}$     | $1.00 \times 10^{+00}$     | N/A                                  | N/A                                  | N/A                                  |
| Nicotine-N-Oxide   | $\leq 3.42 \times 10^{-4a}$              | $\leq 1.91 \times 10^{-4a}$              | N/A                        | N/A                        | N/A                        | N/A                                  | N/A                                  | N/A                                  |
| NNK                | $\leq 2.95 \times 10^{-7a}$              | $\leq 1.65 \times 10^{-7a}$              | $1.61 \times 10^{-4}$      | $1.48 \times 10^{-4}$      | $4.88 \times 10^{-6}$      | $\downarrow \geq 99.82$              | $\downarrow \geq 99.89$              | $\downarrow \geq 96.61$              |
| NNN                | $\leq 1.93 \times 10^{-7a}$              | $\leq 1.08 \times 10^{-7a}$              | $1.87 \times 10^{-4}$      | $1.69 \times 10^{-4}$      | $1.13 \times 10^{-5}$      | $\downarrow \geq 99.90$              | $\downarrow \geq 99.94$              | $\downarrow \geq 99.05$              |
| <i>Nornicotine</i> | $\leq 9.96 \times 10^{-5a}$              | $\leq 9.96 \times 10^{-5a}$              | N/A                        | N/A                        | N/A                        | N/A                                  | N/A                                  | N/A                                  |
| Propionic Acid     | $\leq 3.06 \times 10^{-3b}$              | $\leq 3.95 \times 10^{-4a}$              | N/A                        | N/A                        | N/A                        | N/A                                  | N/A                                  | N/A                                  |
| Propylene Glycol   | <b><math>9.02 \times 10^{+00}</math></b> | <b><math>9.23 \times 10^{+00}</math></b> | $4.21 \times 10^{-3}$      | $1.36 \times 10^{-2}$      | $3.25 \times 10^{-1}$      | $2.14 \times 10^{+05}$               | $6.76 \times 10^{+04}$               | $2.73 \times 10^{+03}$               |
| Propylene Oxide    | $\leq 6.12 \times 10^{-5a}$              | $\leq 3.43 \times 10^{-5a}$              | $4.23 \times 10^{-1}$      | $5.03 \times 10^{-1}$      | $1.23 \times 10^{-4}$      | $\downarrow \geq 99.99$              | $\downarrow \geq 99.99$              | $\downarrow \geq 72.19$              |
| Toluene            | $\leq 2.40 \times 10^{-4a}$              | $\leq 1.34 \times 10^{-4a}$              | $7.32 \times 10^{-2}$      | $7.69 \times 10^{-2}$      | $1.98 \times 10^{-3}$      | $\downarrow \geq 99.67$              | $\downarrow \geq 99.83$              | $\downarrow \geq 93.20$              |
| Water              | <b><math>5.04 \times 10^{+00}</math></b> | <b><math>4.61 \times 10^{+00}</math></b> | $4.21 \times 10^{+00}$     | $8.36 \times 10^{+00}$     | $2.45 \times 10^{+01}$     | <b>19.67</b>                         | <b>-44.87</b>                        | <b>-81.22</b>                        |
|                    |                                          |                                          |                            |                            |                            | <b>Average<sup>c</sup></b>           | <b>Average<sup>c</sup></b>           | <b>Average<sup>c</sup></b>           |
|                    |                                          |                                          |                            |                            |                            | <b><math>\downarrow</math> 98.02</b> | <b><math>\downarrow</math> 98.74</b> | <b><math>\downarrow</math> 90.66</b> |

BLOD=Below limit of quantitation; BLOQ=Below limit of quantitation; NDFB=Not different from background,  $\downarrow$ = less than, Bolded reductions were based on quantifiable values. Analytes in italics were tested under a single modified puffing

---

regimen: 70mL puff, 3 second duration, 30 second interval <sup>a</sup> analyte was BLOD for all three 50 puff blocks <sup>b</sup> analyte was BLOQ for all three 50 puff blocks <sup>a,b</sup> analyte was either BLOD or BLOQ for all three 50 puff blocks <sup>c</sup> excluding PG, VG and water.
